# Supplementary material for: Fusing 10-vertex closo-carborane anions with N-heterocyclic carbenes
Source: Royal Society of Chemistry journal article supplement (doi:10.1039/d2cc02596e), 2022-01-01
Supplement: d2cc02596e1.pdf [file d2cc02596e1.pdf]

## Supplementary Information

### Fusing 10-vertex *closo*-Carborane Anions with N-Heterocyclic Carbenes

Varun Tej, Sarah E. McArthur\*, Isaac Banda, Aaron Gregory, Scott G. McArthur, Steven P. Fisher, Vincent Lavallo\*

Correspondence to: vincent.lavallo@ucr.edu

†Department of Chemistry, University of California Riverside. Riverside, CA 92521 (USA).  
vincent.lavallo@ucr.edu

#### Table of Contents

|                                                                     |     |
|---------------------------------------------------------------------|-----|
| Compound 7 Synthesis and Spectroscopic Data.....                    | 3   |
| Compound 8 Synthesis and Spectroscopic Data.....                    | 7   |
| Compound 9 Synthesis and Spectroscopic Data.....                    | 9   |
| Compound 10[Li <sup>+</sup> ] Synthesis and Spectroscopic Data..... | 12  |
| Compound 10[K <sup>+</sup> ] Synthesis and Spectroscopic Data.....  | 15  |
| Compound 12 Synthesis and Spectroscopic Data.....                   | 16  |
| X-Ray Structure Data for Compound 10[K <sup>+</sup> ] .....         | 18  |
| X-Ray Structure Data for Compound 12 .....                          | 66  |
| References.....                                                     | 117 |

#### General Considerations

Unless otherwise stated, all manipulations were carried out using standard Schlenk or glovebox techniques (O<sub>2</sub>, H<sub>2</sub>O < 1ppm) under a dinitrogen or argon atmosphere. Solvents were dried on sodium-potassium alloy or potassium benzophenone ketyl, and distilled under argon before use. 6-C<sub>3</sub>H<sub>7</sub>N-6-CB<sub>9</sub>H<sub>11</sub> was prepared according to literature methods.<sup>1</sup> Reagents were purchased from commercial vendors and used without further purification. NMR spectra were recorded on Bruker Avance 300 MHz, Bruker Avance Neo 400 MHz, Bruker Avance 600 MHz, Bruker Avance III 700 MHz, Varian Inova 300 MHz, or Varian Inova 400 MHz spectrometers.

NMR chemical shifts are reported in parts per million (ppm).  $^1\text{H}$  NMR and  $^{13}\text{C}$  NMR chemical shifts were referenced to residual solvent.  $^{11}\text{B}$  NMR chemical shifts were externally referenced to  $\text{BF}_3\cdot\text{OEt}_2$ . High-resolution mass spectrometry (HRMS) was recorded on Agilent Technologies 6210 (time of flight LC/MS) using ESI technique. Complete crystallographic data for compounds **10**[ $\text{K}^+$ ], and **12** are available free of charge from the Cambridge Crystallographic Data Center under the reference numbers 1848686 and 1848697 respectively. The crystallographic data of these structures can be accessed via the ccdc website: <http://www.ccdc.cam.ac.uk/Community/Requestastructure/Pages/DataRequest.aspx>.

### **Synthesis of 10-vertex Carborane Amine**

The first step of this project is to synthesize the 10-vertex amine. After surveying the literature we found a few synthetic approaches to make this compound. However after attempting these methods we found they had synthetic drawbacks, that we shall describe here. Ultimately this led us to develop a novel synthetic method. The first method attempted was the synthesis from Kennedy and coworkers<sup>2</sup> of the carboxylic acid derivative of the *closo*-2- $\text{CB}_9\text{H}_{10}^-$  anion to be used as a precursor for the 10-vertex amine. The first step of the synthesis is a Brellocks reaction,<sup>3</sup> replacing a boron vertex with a carbon atom bearing the functional group. This leads to a functionalized open cage *arachno*-carborane cluster. *Although not noted in the Kennedy paper, it should be noted that this arachno structure may spontaneously combust when exposed to air, and the reaction should be performed and the product stored under an inert atmosphere.* After obtaining the carboxylic acid functionalized 10-vertex carborane, the acid chloride was formed and reacted with  $\text{NaN}_3$ , undergoing a Curtius rearrangement.<sup>4</sup> The crude reaction should form a mixture of isocyanate and amine functionalized 10-vertex carborane, that fully converts to amine upon hydrolysis. The conversion of the isocyanate to the amine often resulted in a mixture of unidentified products, and after crystallization the yield was usually low. Kennedy and coworkers also published a synthesis of the 10-vertex carboranyl amine cluster that begins with a reaction of decaborane and sodium cyanide, resulting in a mixture of 7- $\text{NH}_3$ -7- $\text{CB}_{10}\text{H}_{12}$  and 6- $\text{NH}_3$ -6- $\text{CB}_9\text{H}_{11}$ .<sup>5</sup> The separation of these two products is achieved with the addition of acetone to the crude reaction mixture, precipitating the zwitterionic iminium, 6- $\text{C}_3\text{H}_7\text{N}$ -6- $\text{CB}_9\text{H}_{11}$ .<sup>1</sup> After isolating this compound, it was treated with  $\text{NaBH}_4$  and borane trimethylamine, which results in a mixture of

both the 12 and 10-vertex *closo*-carboranyl amine clusters. They then claimed these two clusters could be separated through crystallization.<sup>6</sup>

We sought an alternative, more direct route to the 10-vertex carboranyl amine without having to separate the product from a mixture. After isolating 6-C<sub>3</sub>H<sub>6</sub>N-6-CB<sub>9</sub>H<sub>11</sub>,<sup>1</sup> treatment with KOH and I<sub>2</sub> results in the 2-isomer of the 10-vertex *closo*-carboranyl amine (2-NH<sub>2</sub>-2-CB<sub>9</sub>H<sub>9</sub>), which readily isomerizes to the desired 1-isomer of the amine, 1-NH<sub>2</sub>-1-CB<sub>9</sub>H<sub>9</sub> upon reflux or spontaneously during crystallization.

### Synthesis of 10-vertex Carborane Amine 7

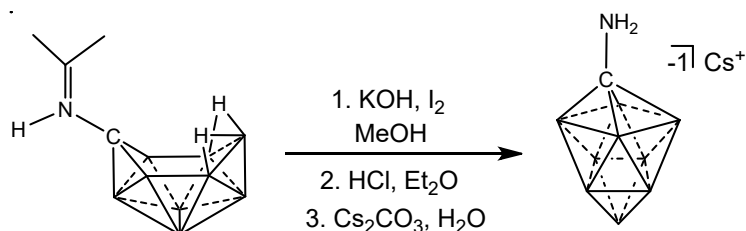

In a 500 mL round bottom, 2.00 grams of the zwitterion 6-C<sub>3</sub>H<sub>7</sub>N-6-CB<sub>9</sub>H<sub>11</sub> (11.3 mmol) was added to 260 mL of a 1.5 M solution of KOH in MeOH in an ice bath. To the stirring solution, 4.5 grams (17.7 mmol) of I<sub>2</sub> was added and allowed to stir for 1 hour. The MeOH was removed via reduced pressure and the resulting solid was resuspended in 100 mL of H<sub>2</sub>O, and the excess base was quenched by slowly acidifying with 27 mL of concentrated HCl (checked by litmus). The aqueous solution is then extracted with diethyl ether (3 x 20mL) and the organics were pumped down on a rotary evaporator, resulting in a light brown oil. After adding 10 mL of H<sub>2</sub>O and 3.68 grams of Cs<sub>2</sub>CO<sub>3</sub> (11.3 mmol) to this oil, the solution was allowed to cool down. The desired product **7** then crystallized out of the aqueous solution as off white crystals in about 60% yield. (1.81 g, 6.77 mmol). <sup>1</sup>H NMR (400 MHz, acetonitrile-d<sub>3</sub>, 25 °C): 3.21 (s, 2H, N-H), 5.5-0.0 (bm, 9H, B-H); <sup>1</sup>H (<sup>11</sup>B-dec) NMR (300 MHz, acetonitrile-d<sub>3</sub>, 25 °C): 3.20 (s, 2H, N-H), 1.50 (s, 5H, B-H), 0.47 (s, 4H, B-H); <sup>11</sup>B (<sup>1</sup>H-dec) NMR (96 MHz, acetonitrile-d<sub>3</sub>, 25 °C): δ = 19.8, -16.6, -25.9; <sup>11</sup>B NMR (96 MHz, acetonitrile-d<sub>63</sub>, 25 °C): δ = 19.2, -17.2, -26.5; <sup>13</sup>C-(<sup>1</sup>H-dec) NMR (124 MHz, acetonitrile-d<sub>6</sub>, 25°C): δ = 85.1 ppm.

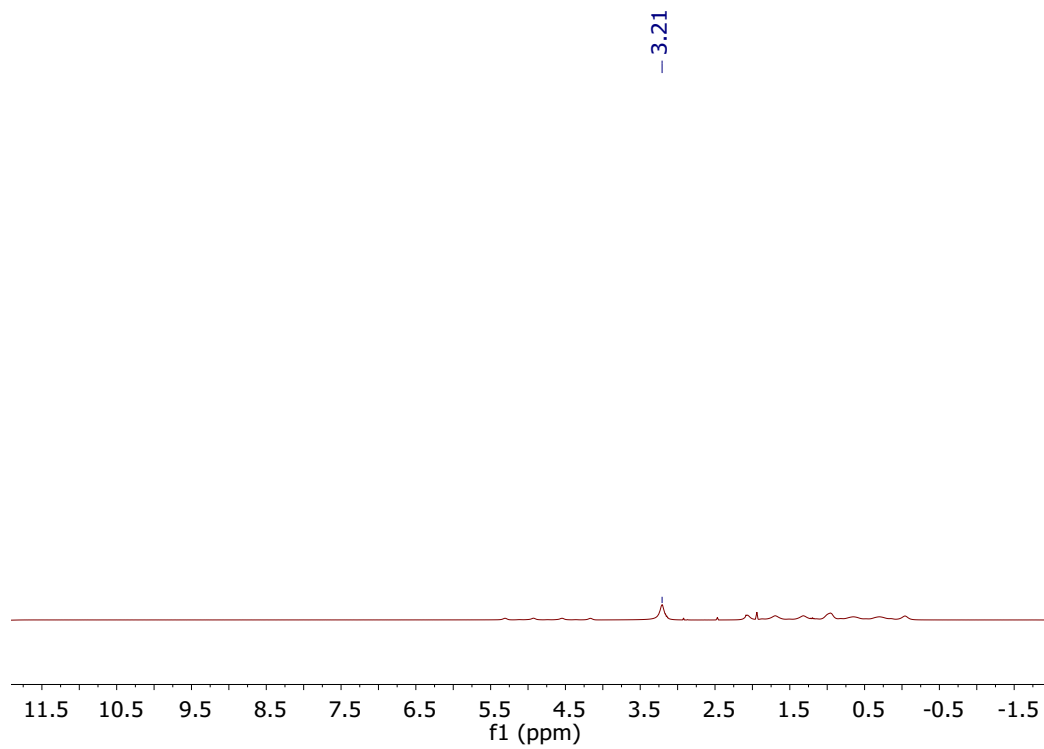

Fig. S6.  $^1\text{H}$ -NMR of  $7[\text{Cs}^+]$  in acetonitrile.

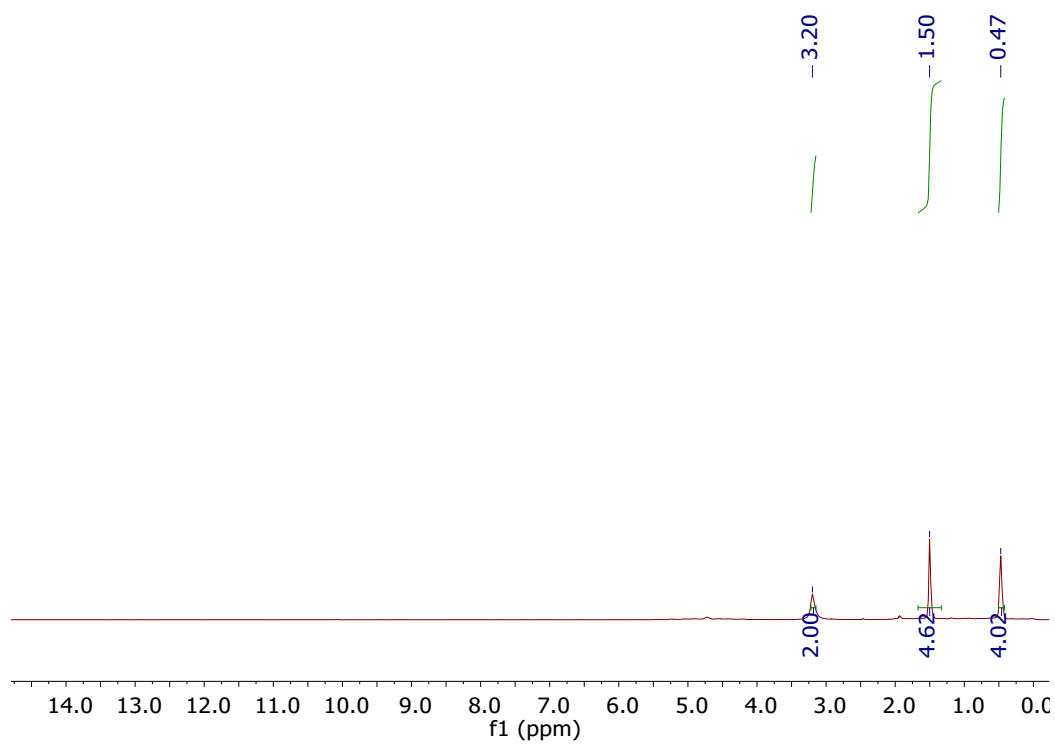

Fig. S7.  $^1\text{H}$ -( $^{11}\text{B}$ -dec) NMR of  $7[\text{Cs}^+]$  in acetonitrile.

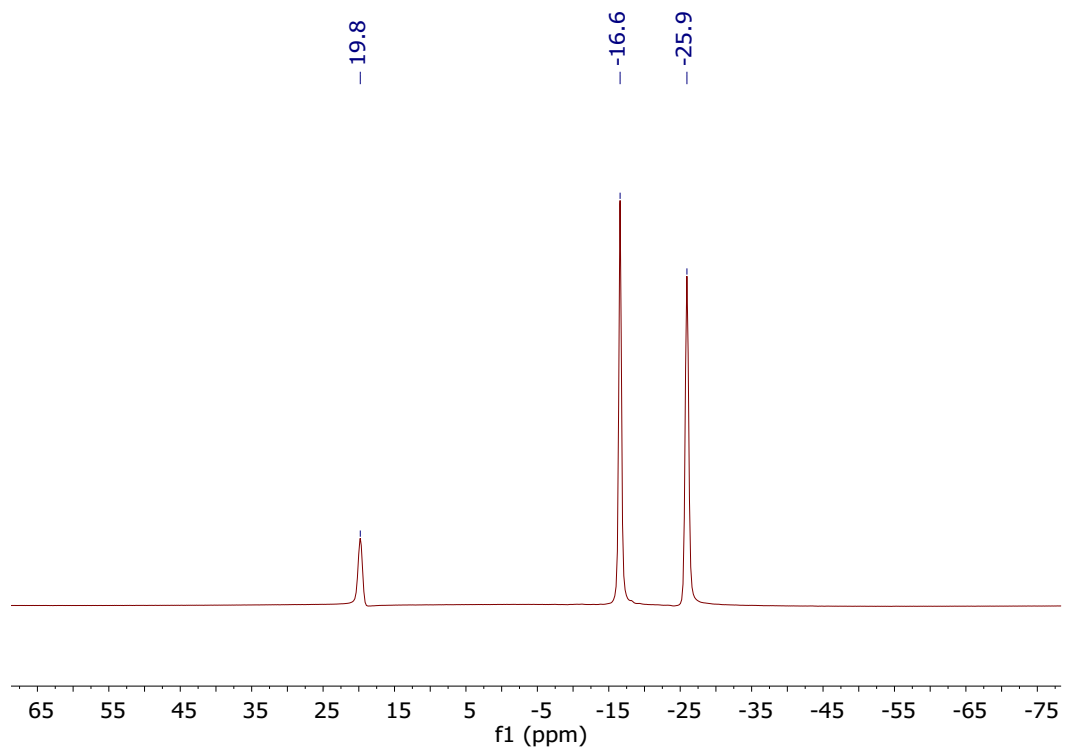

Fig. S8.  $^{11}\text{B}$ -( $^1\text{H}$ -dec) NMR of  $7[\text{Cs}^+]$  in acetonitrile.

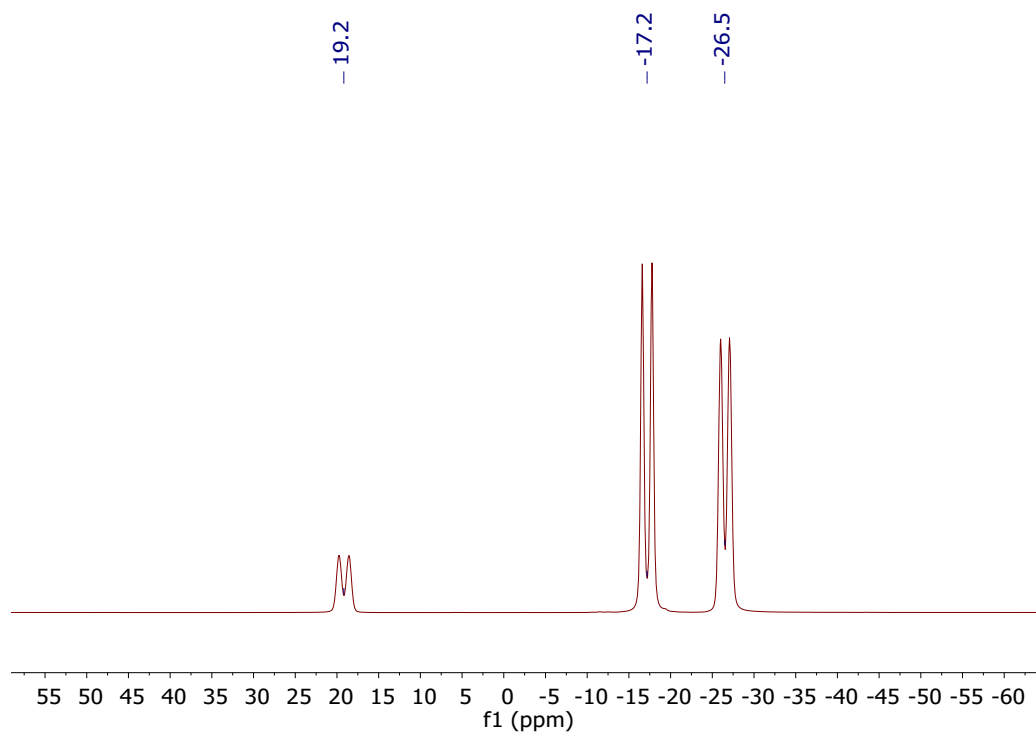

Fig. S9.  $^{11}\text{B}$ -NMR of  $7[\text{Cs}^+]$  in acetonitrile.

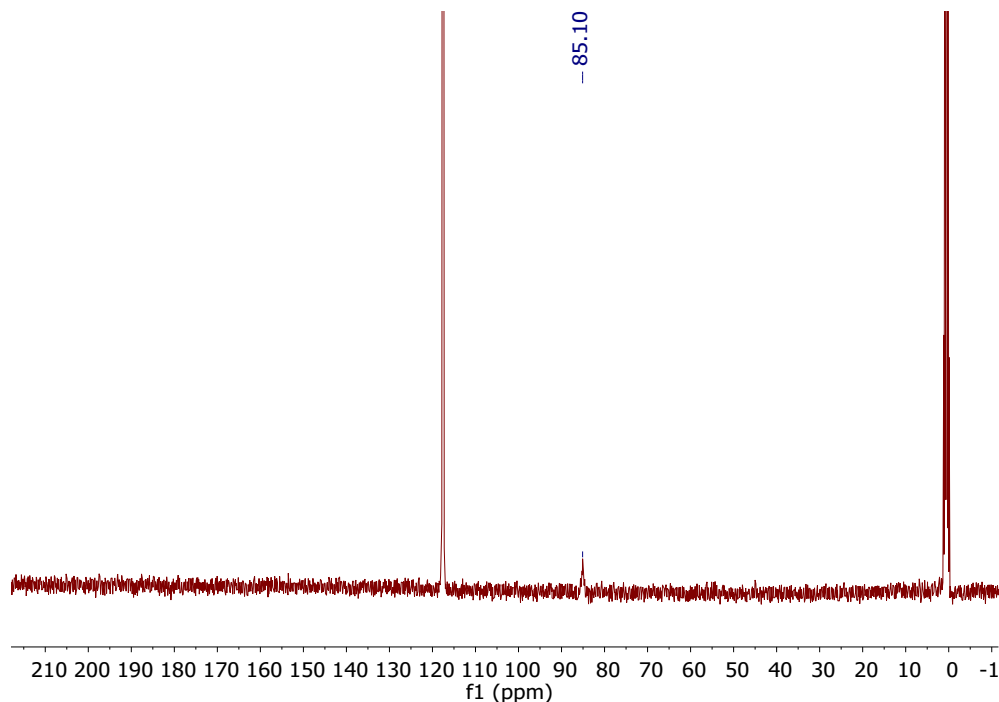

Fig. S10.  $^{13}\text{C}$  NMR of  $7[\text{Cs}^+]$  in acetonitrile.

### Synthesis of 10-Vertex Dianionic Carboranyl Diimine 8

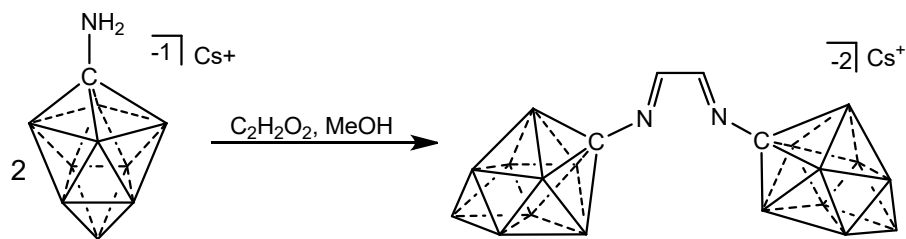

Glyoxal ( $\text{O}_2\text{C}_2\text{H}_2$ ) aqueous solution (40 % w/w, 325 mg, 2.2 mmol) was added to a solution of  $\text{CsNH}_2\text{CB}_9\text{H}_9$  (1.20 g, 4.4 mmol) dissolved in methanol (15 mL) and the reaction mixture stirred for 24 hours. Volatiles were removed under vacuum to afford the crude diimine as a light brown powder. The resulting yield of the  $\text{Cs}^+$  diimine salt **8** was 98% (1.22 g, 2.2 mmol)  $^1\text{H}$  NMR (400 MHz, acetonitrile- $\text{d}_3$ , 25 °C):  $\delta$  = 8.94 (s, 2H), 2.70-0.0 (bm, 18H, B-H);  $^{13}\text{C}$ -( $^1\text{H}$ -dec) NMR (125 MHz, acetonitrile- $\text{d}_3$ , 25 °C):  $\delta$  = 165.2;  $^{11}\text{B}$ -( $^1\text{H}$ -dec) NMR (96 MHz, acetonitrile- $\text{d}_3$ , 25 °C):  $\delta$  = 26.2, -17.4, -25.2 ppm.

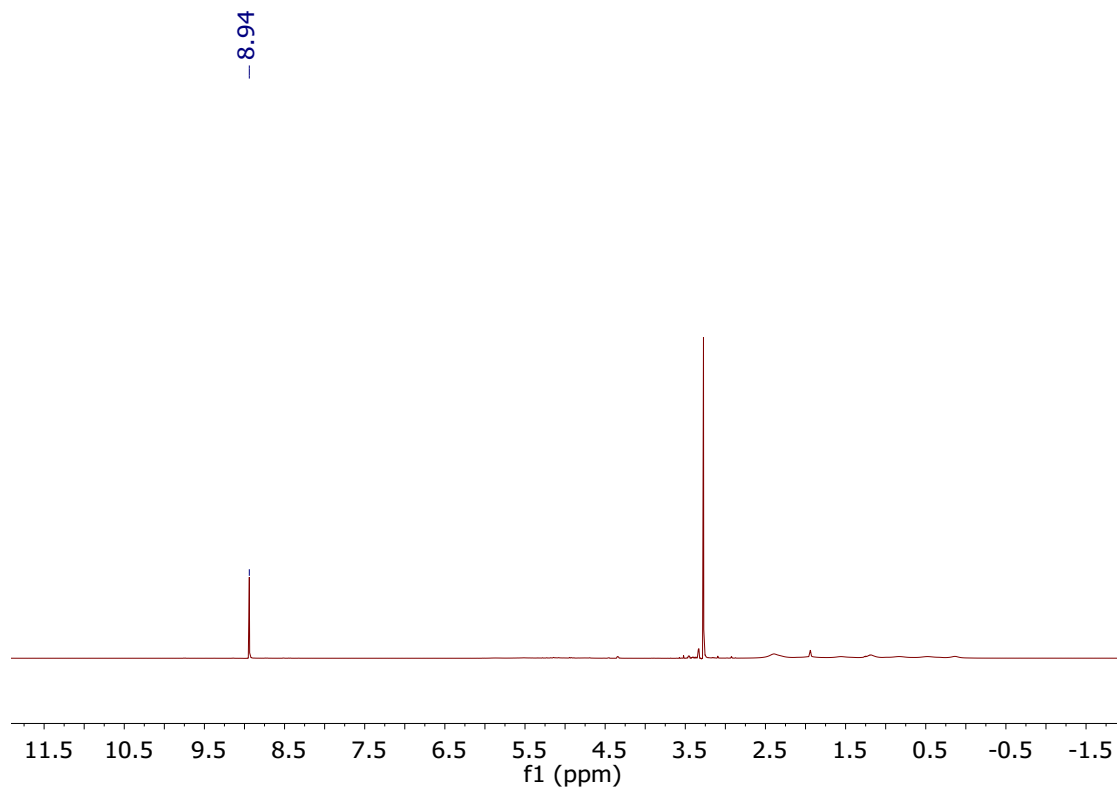

Fig. S11. <sup>1</sup>H-NMR of **8** in acetonitrile-d<sub>3</sub>. The peak at 3.27 ppm due to presence of MeOH.

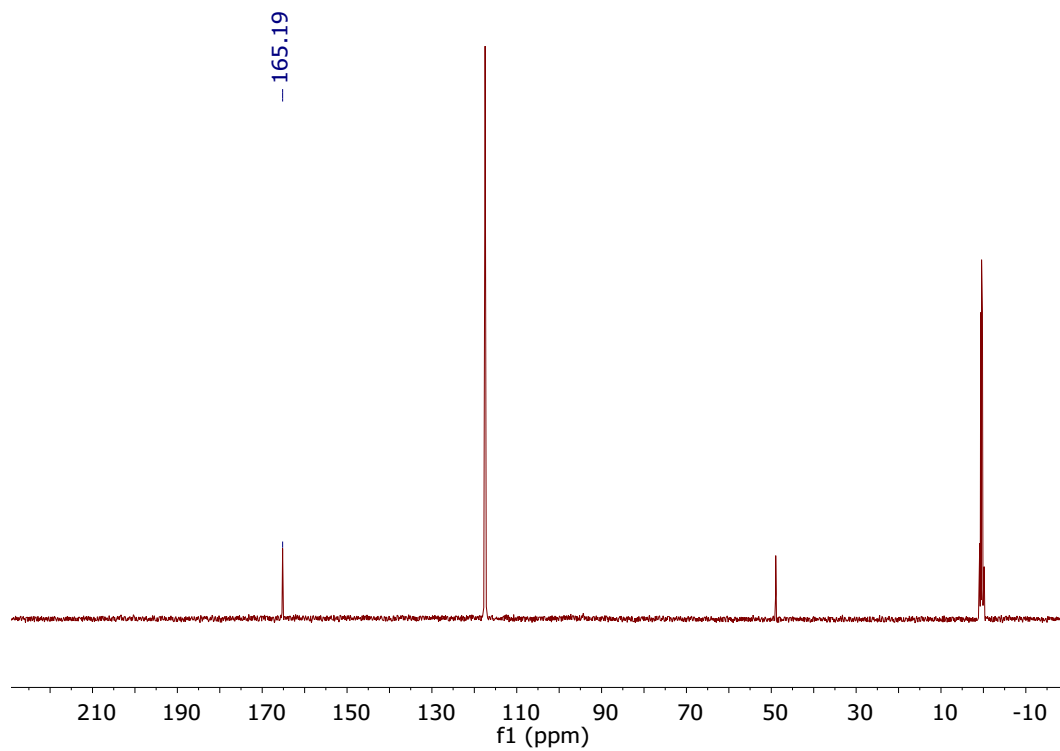

Fig. S12. <sup>13</sup>C-NMR of **8** in acetonitrile-d<sub>3</sub>. The peak at 48.9 ppm due to presence of MeOH.

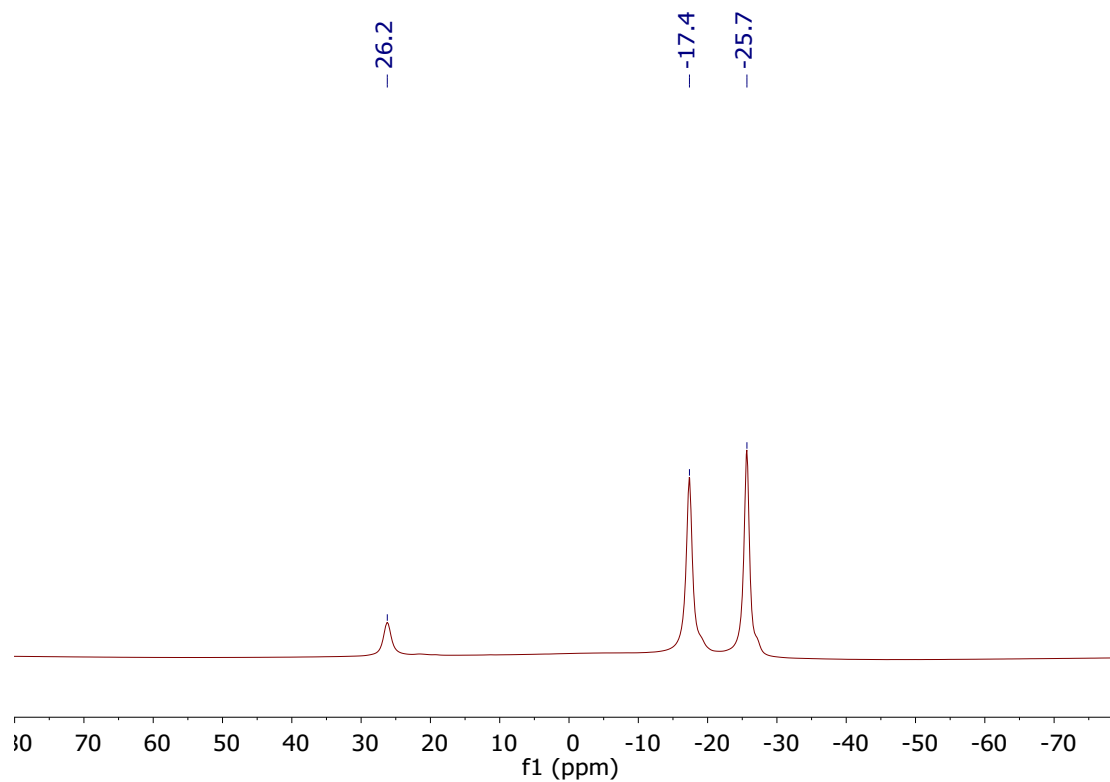

Fig. S13.  $^{11}\text{B}$ -NMR of **8** in acetonitrile- $\text{d}_3$ .



## Synthesis of 10-Vertex Imidazolium Salt **9**

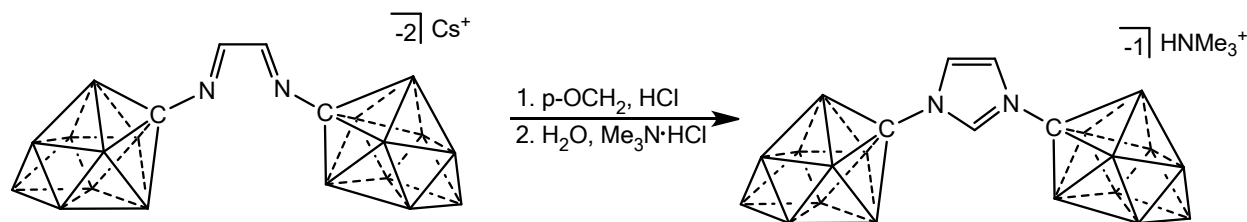

Without further purification, the crude diimine (1.22 g, 2.2 mmol) was dissolved in a solution of ethyl acetate (10 mL). A second solution of 2M HCl/diethyl ether (4 mL) was added to paraformaldehyde (79 mg, 2.6 mmol) and stirred for 30 minutes. The mixture of paraformaldehyde and HCl/diethyl ether was then added to the ethyl acetate solution dropwise, and stirred for three hours. Subsequent removal of all volatiles under high vacuum afforded **9** as a crude mixture. Impurities were removed by washing the product with boiling water, followed by cation exchange to the corresponding  $\text{HNMe}_3^+$  salt through the addition of 1.3 equivalents of trimethylammonium hydrochloride in  $\text{H}_2\text{O}$ . The resulting yield of the  $\text{HNMe}_3^+$  imidazolium salt **9** was 76% (473 mg, 1.70 mmol)  $^1\text{H}$  NMR (300 MHz, acetone- $\text{d}_6$ , 25 °C):  $\delta = 10.26$  (t,  $^4J(\text{H},\text{H}) = 1.72$  Hz, 1H), 8.45 (d,  $^4J(\text{H},\text{H}) = 1.72$  Hz, 2H), 3.25-0.0 (bm, 18H, B-H);  $^{13}\text{C}$ -( $^1\text{H}$ -dec) NMR (125 MHz, acetone- $\text{d}_6$ , 25 °C):  $\delta = 139.27, 125.94, 73.71$ ;  $^{11}\text{B}$ -( $^1\text{H}$ -dec) NMR (96 MHz, acetone- $\text{d}_6$ , 25 °C):  $\delta = 31.0, -15.4, -25.2$  ppm. HRMS (negative mode ESI/APCI)  $[\text{M}]^-$   $m/z$  calc'd for  $\text{N}_2\text{C}_5\text{B}_{18}\text{H}_{21}^- = 304.3498$ ; Found = 304.3491.

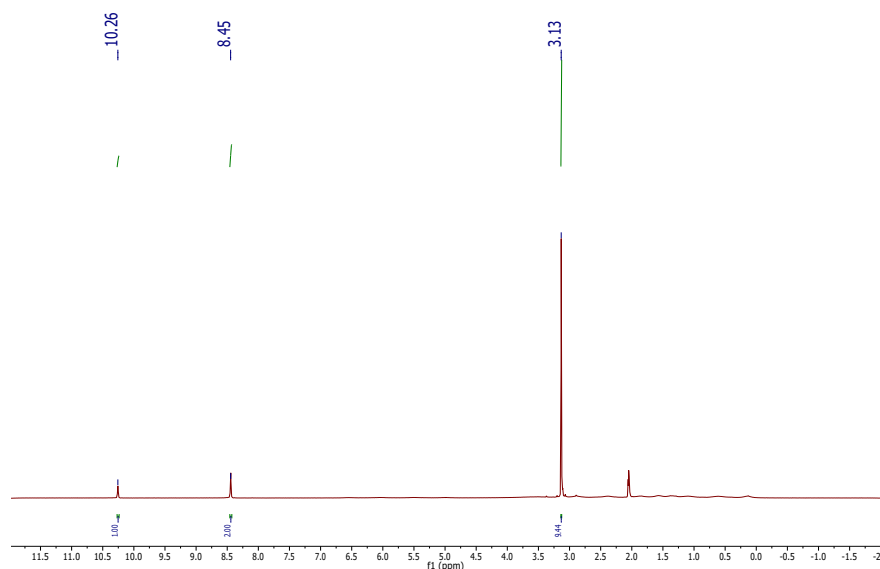

Fig. S14.  $^1\text{H}$ -NMR of **9** in acetone- $\text{d}_6$ . The peak at 3.13 ppm is due to  $\text{Me}_3\text{NH}^+$  counterion.

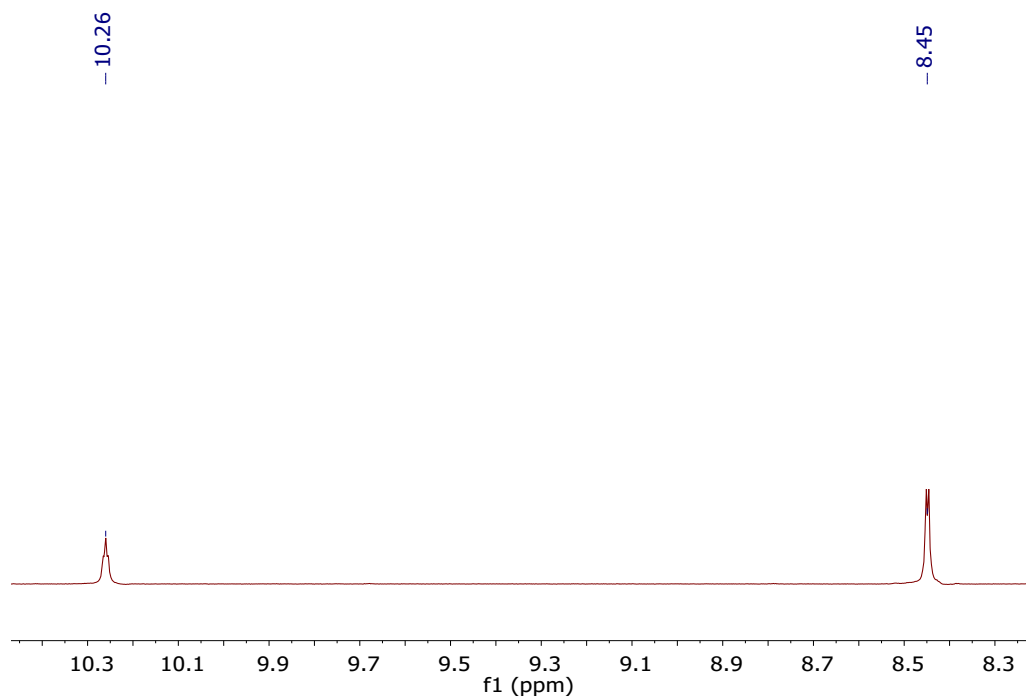

Fig. S15. An expanded view of the aromatic region of the  $^1\text{H-NMR}$  of **9** in acetone- $\text{d}_6$ , showing the small  $^4J(\text{H,H})$  coupling through the imidazolium ring.

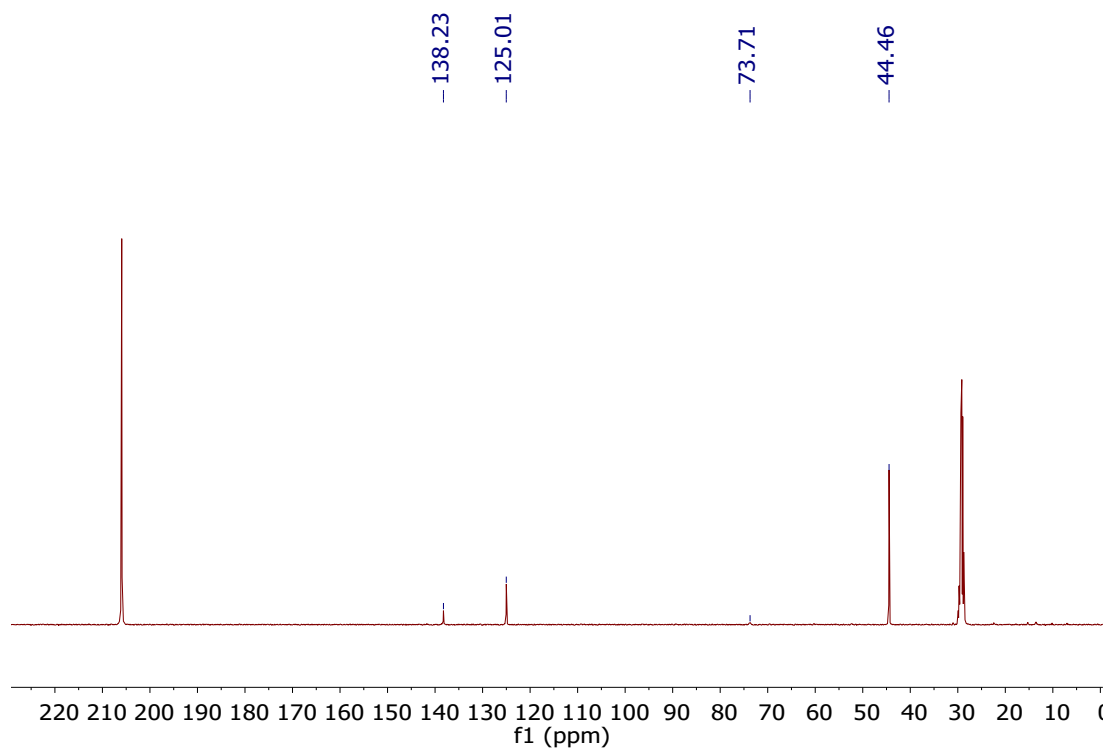

Fig. S16.  $^{13}\text{C-}(^1\text{H-dec})$  NMR of **9** in acetone- $\text{d}_6$ . The peak at 44.46 ppm is due to  $\text{Me}_3\text{NH}^+$  counter cation.

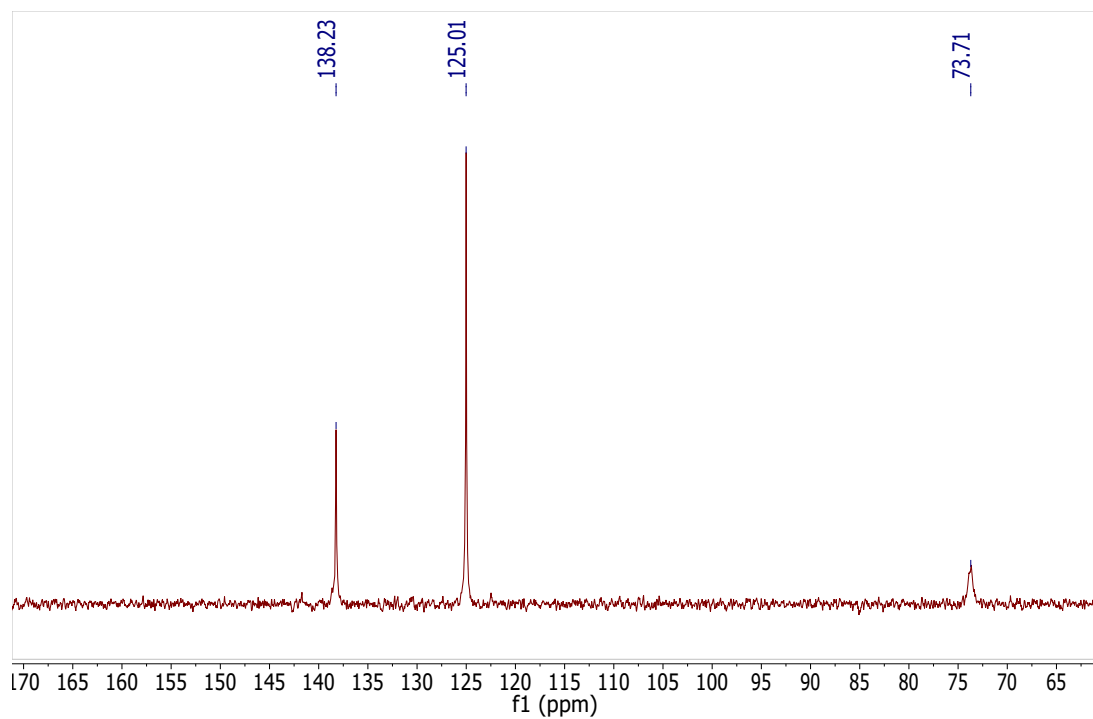

Fig. S17. An expanded view of the  $^{13}\text{C}$ -( $^1\text{H}$ -dec) NMR of **9** in acetone- $\text{d}_6$  showing the resonance of the carborane carbon at 73.71, as well as the carbon resonances of the imidazolium ring.

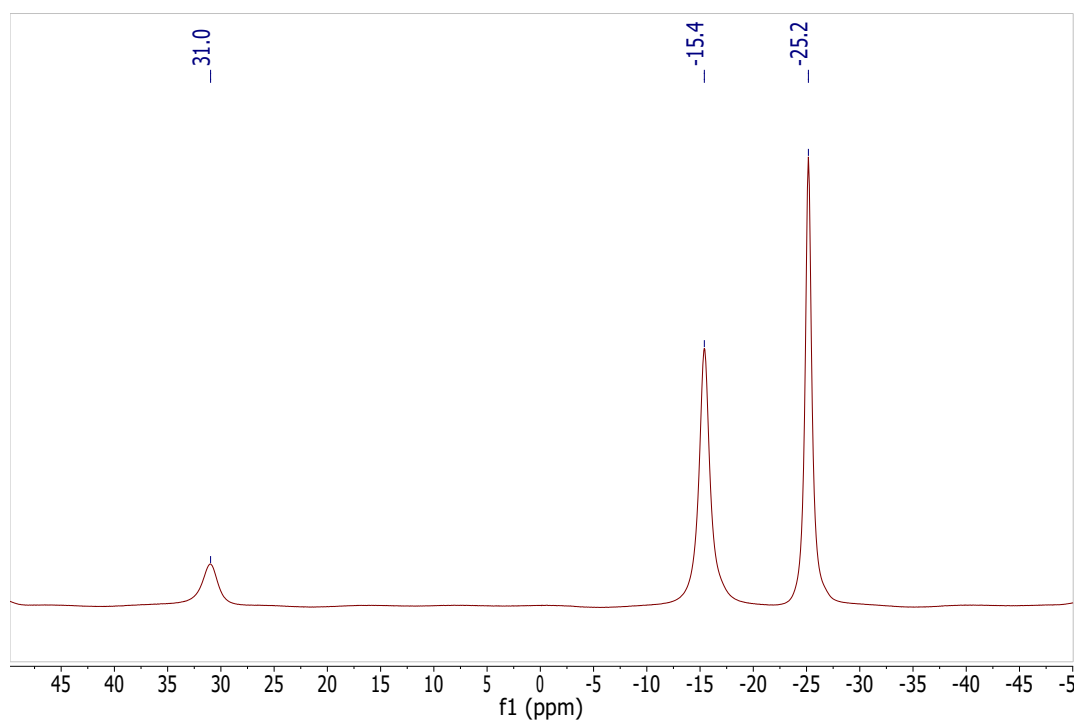

Fig. S18.  $^{11}\text{B}$ -( $^1\text{H}$ -dec) NMR of **9** in acetone- $\text{d}_6$ .

### Synthesis of Normal Li<sup>+</sup> NHC **10**[Li<sup>+</sup>]

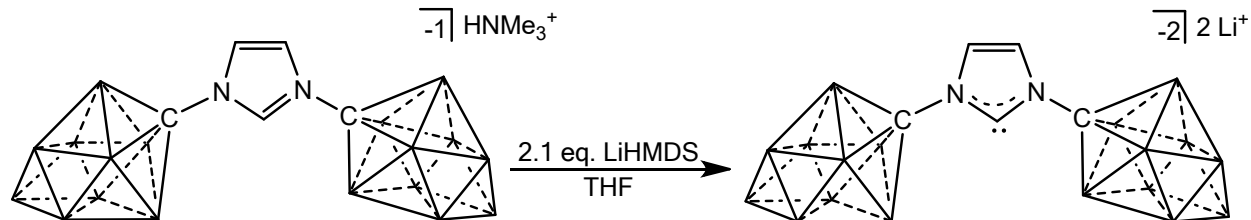

A vial equipped with a stir bar was loaded with 310 mg (0.82 mmol) of **9**[HNMe<sub>3</sub><sup>+</sup>] and 5 mL of tetrahydrofuran. In a second vial, 2.1 equivalents (10 mg, 1.72 mmol) of LiHMDS was added and dissolved in tetrahydrofuran (5 mL). The two tetrahydrofuran solutions were combined, the vial capped, and the mixture stirred for 1 hour. The tetrahydrofuran solution was added dropwise to a stirring vial of diethyl ether (20 mL), precipitating a light brown powder. The precipitate was left stirring in diethyl ether for 30 minutes. The solvent was decanted off the precipitate, and the remaining volatiles were removed under vacuum, affording the product **10**[Li<sup>+</sup>] in 92% yield (454 mg, 0.75 mmol) (Note: Li<sup>+</sup> counteranions contain 4 coordinated tetrahydrofuran molecules). <sup>1</sup>H NMR (400 MHz, tetrahydrofuran-d<sub>8</sub>, 25 °C): δ = 7.75 (s, 2H), 0.01-2.75 (bm, 18H, B-H); <sup>13</sup>C-(<sup>1</sup>H-dec) NMR (125 MHz, tetrahydrofuran-d<sub>8</sub>, 25 °C): δ = 197.72, 121.58, 79.34; <sup>11</sup>B-(<sup>1</sup>H-dec) NMR (96 MHz, tetrahydrofuran-d<sub>8</sub>, 25 °C): δ = 31.4, -21.8, -22.2 ppm.

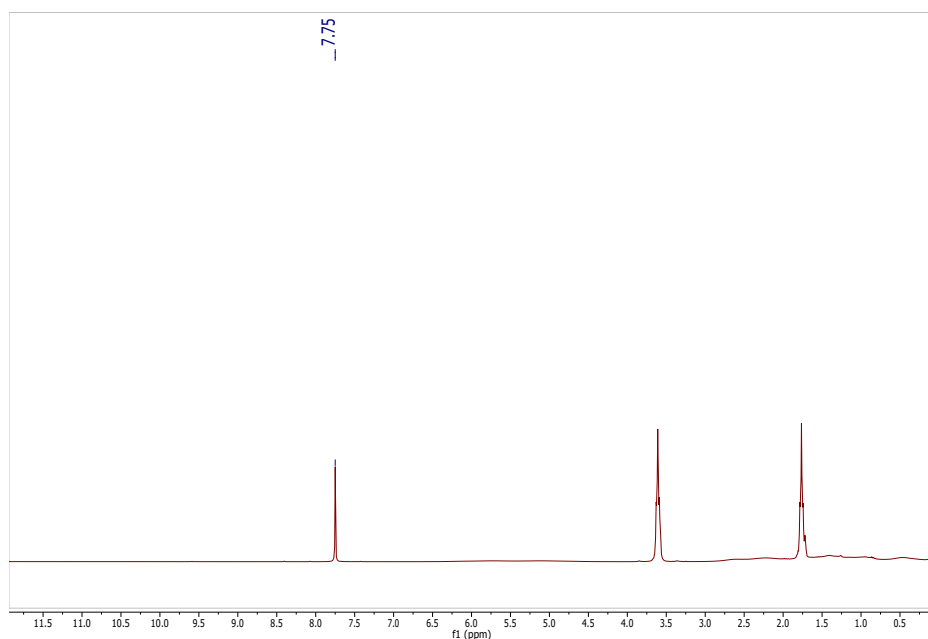

Fig. S19. <sup>1</sup>H-NMR of **10**[Li<sup>+</sup>] in tetrahydrofuran -d<sub>8</sub>.

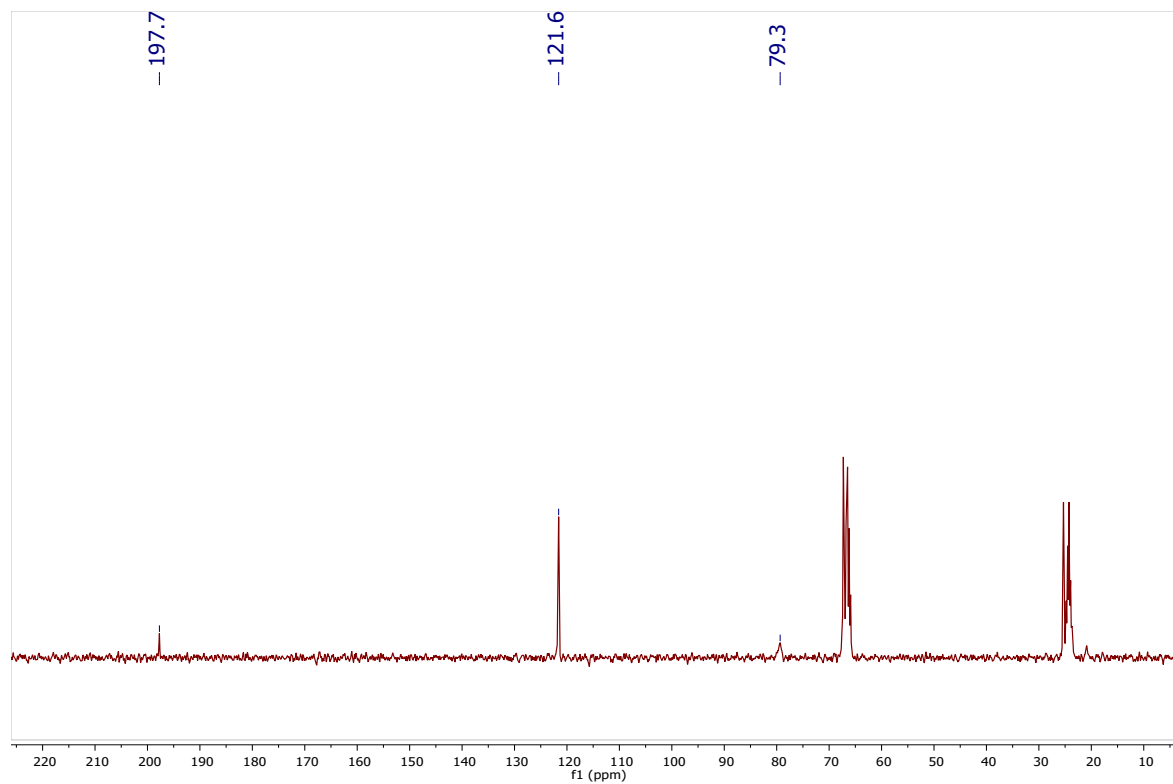

Fig. S20.  $^{13}\text{C}$ -( $^1\text{H}$ -dec) NMR of  $10[\text{Li}^+]$  in tetrahydrofuran - $\text{d}_8$ .

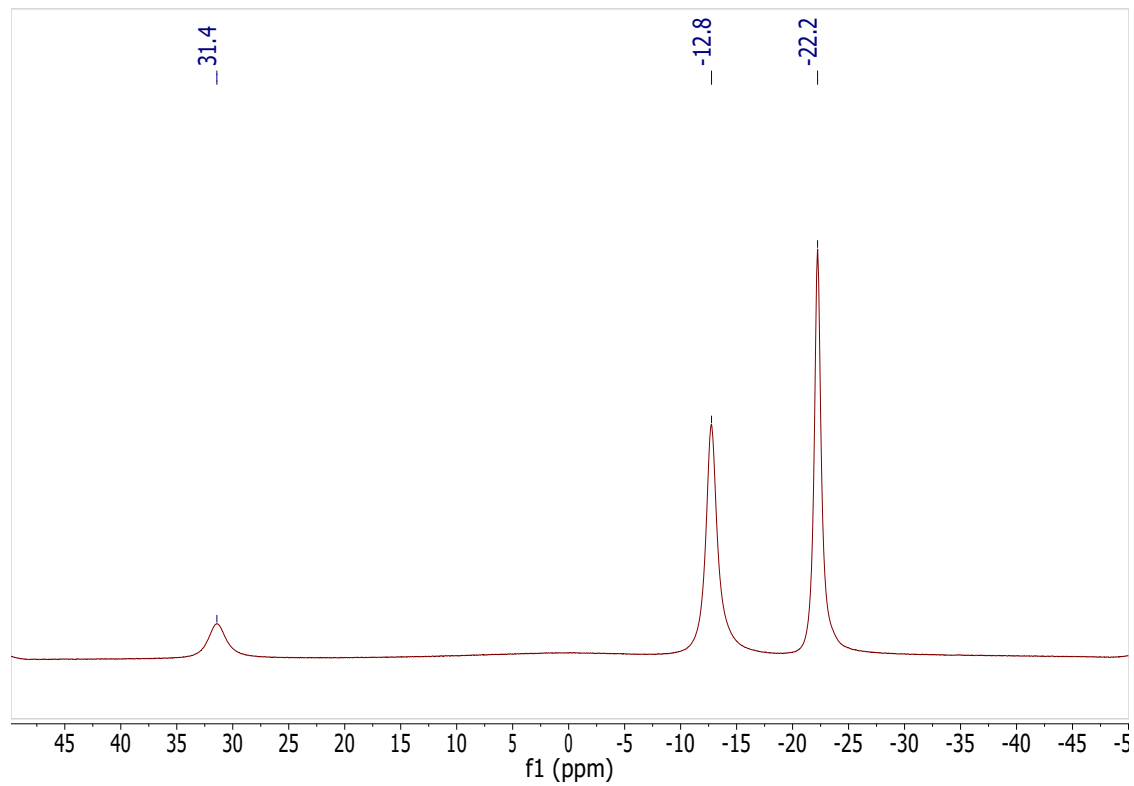

Fig. S21.  $^{11}\text{B}$ -( $^1\text{H}$ -dec) NMR of  $10[\text{Li}^+]$  in tetrahydrofuran - $\text{d}_8$ .

### Synthesis of Normal $K^+$ NHC $10[K^+]$

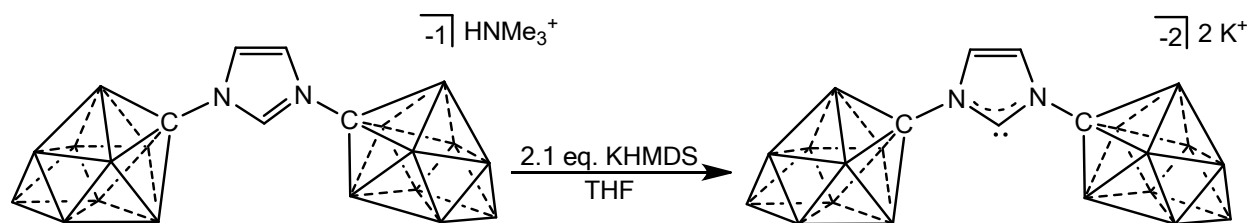

A vial equipped with a stir bar was loaded with 260 mg (0.69 mmol) of **9** $[HNMe_3^+]$  dissolved in tetrahydrofuran (5 mL). In a second vial, 2.1 equivalents (279 mg, 1.4 mmol) of KHMDS was dissolved in tetrahydrofuran (5 mL) and added to the first vial containing **9**. The vial was capped and the mixture stirred for 1 hour. The tetrahydrofuran reaction solution was added dropwise to a stirring vial of diethyl ether, precipitating a brown powder. The precipitate was left stirring in diethyl ether for 30 minutes. The solvent was decanted from the precipitate, and the remaining volatiles were removed under vacuum, affording the product **10** $[K^+]$  in 89% yield (459 mg, 0.61 mmol). (Note:  $K^+$  counteranions contain 3 coordinated THF molecules). Crystals suitable for a single crystal X-ray diffraction study were grown at  $-30\text{ }^\circ\text{C}$  by layering a tetrahydrofuran solution of **10** $[K^+]$  with diethyl ether.  $^1\text{H}$  NMR (500 MHz, tetrahydrofuran  $-d_8$ ,  $25\text{ }^\circ\text{C}$ ):  $\delta = 7.72$  (s, 2H), 2.50-0.0 (bm, 22H, B-H);  $^{11}\text{B}$ -( $^1\text{H}$ -dec) NMR (96 MHz, tetrahydrofuran  $-d_8$ ,  $25\text{ }^\circ\text{C}$ ):  $\delta = 30.5$ , -12.7, -22.1 ppm.

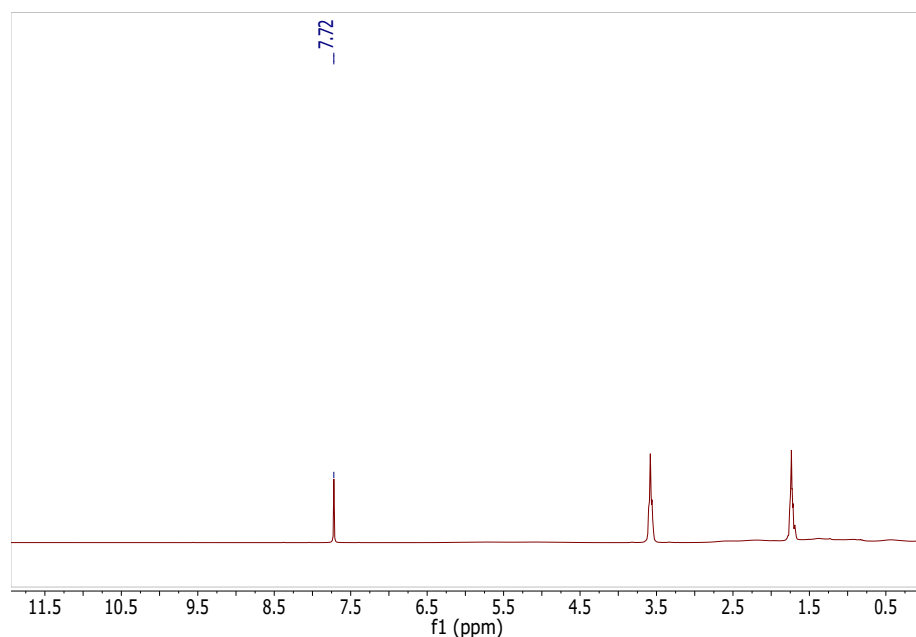

Fig. S22.  $^1\text{H}$ -NMR of **10** $[K^+]$  in tetrahydrofuran  $-d_8$

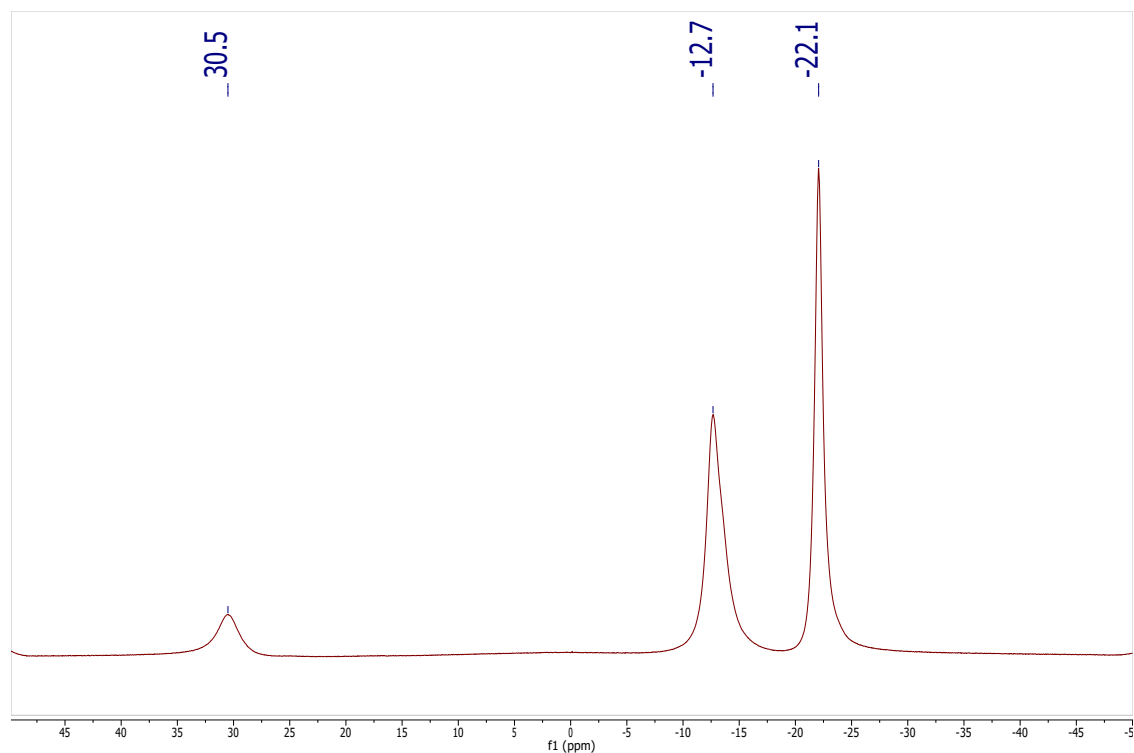

Fig. S23.  $^{11}\text{B}$ -( $^1\text{H}$ -dec) NMR of  $\mathbf{10}[\text{K}^+]$  in tetrahydrofuran- $\text{d}_8$

### Synthesis of Paranormal $\text{Li}^+$ NHC $\mathbf{12}$

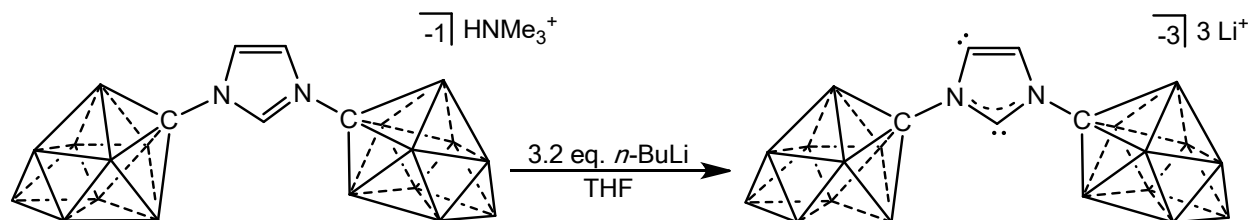

A vial equipped with a stir bar was loaded with 190 mg (0.50 mmol) of  $\mathbf{9}[\text{HNMe}_3^+]$ . In a second vial, 3.2 equivalents (102 mg, 0.15 mL, 1.6 mmol) of neat *n*-butyllithium was dissolved in diethyl ether (7 mL) and added to the vial containing  $\mathbf{9}$ . The vial was capped and the mixture stirred. Upon initial addition of the  $\text{Et}_2\text{O}$  mixture to  $\mathbf{9}$ , an oil formed. After vigorous stirring for 3 hours, the oil developed into a white precipitate. The solvent was decanted from the precipitate, and the remaining volatiles were removed under vacuum, affording the product  $\mathbf{12}$  in 97% yield (370 mg, 0.49 mmol) (Note:  $\text{Li}^+$  counteranions contain 10 coordinated THF molecules).  $^1\text{H}$  NMR (700 MHz, tetrahydrofuran- $\text{d}_8$ , 25  $^\circ\text{C}$ ):  $\delta$  = 7.00 (s, 2H), 0.01-2.65 (bm, 18H, B-H);  $^{13}\text{C}$ -( $^1\text{H}$ -dec) NMR (125 MHz, tetrahydrofuran- $\text{d}_8$ , 25  $^\circ\text{C}$ ):  $\delta$  = 197.6, 169.3, 128.8, 90.0, 83.3;  $^{11}\text{B}$ -( $^1\text{H}$ -dec) NMR (96 MHz, tetrahydrofuran- $\text{d}_8$ , 25  $^\circ\text{C}$ ):  $\delta$  = 31.4, -21.8, -22.2 ppm.

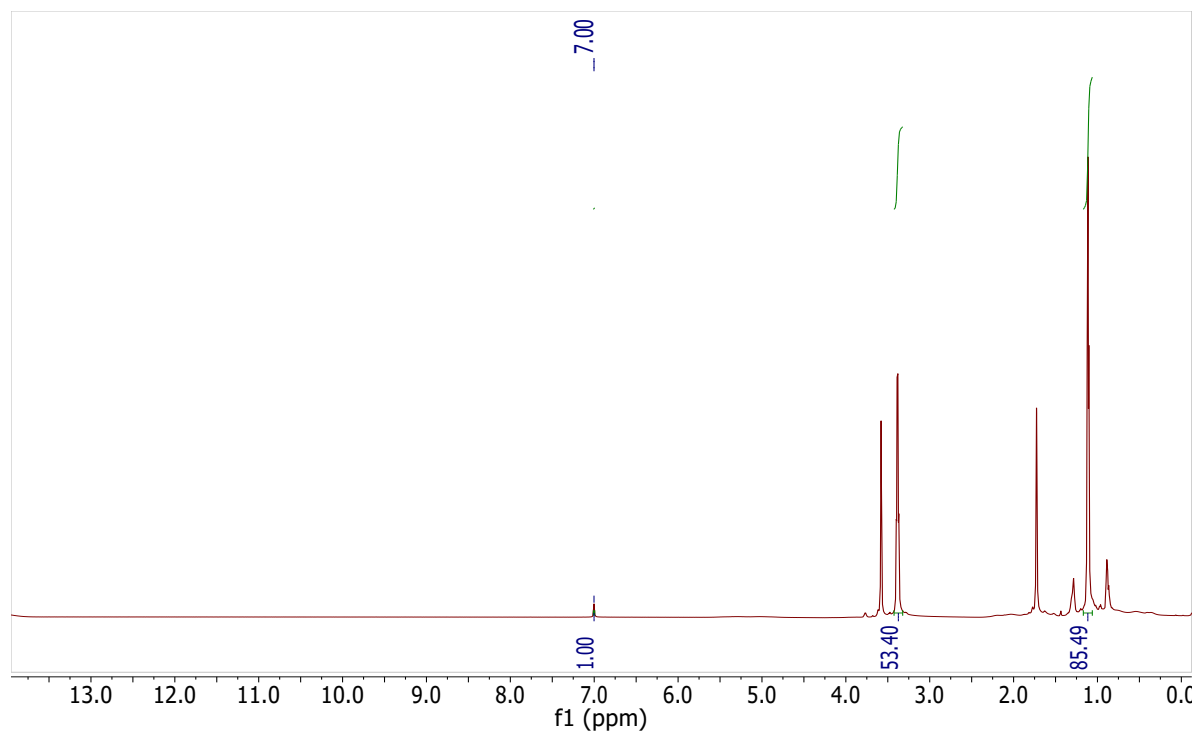

Fig. S24.  $^1\text{H}$ -NMR of **12** in tetrahydrofuran- $d_8$ . Note the presence of diethyl ether at 3.38 and 1.12 ppm, and H-grease at 0.91 and 1.29 ppm.

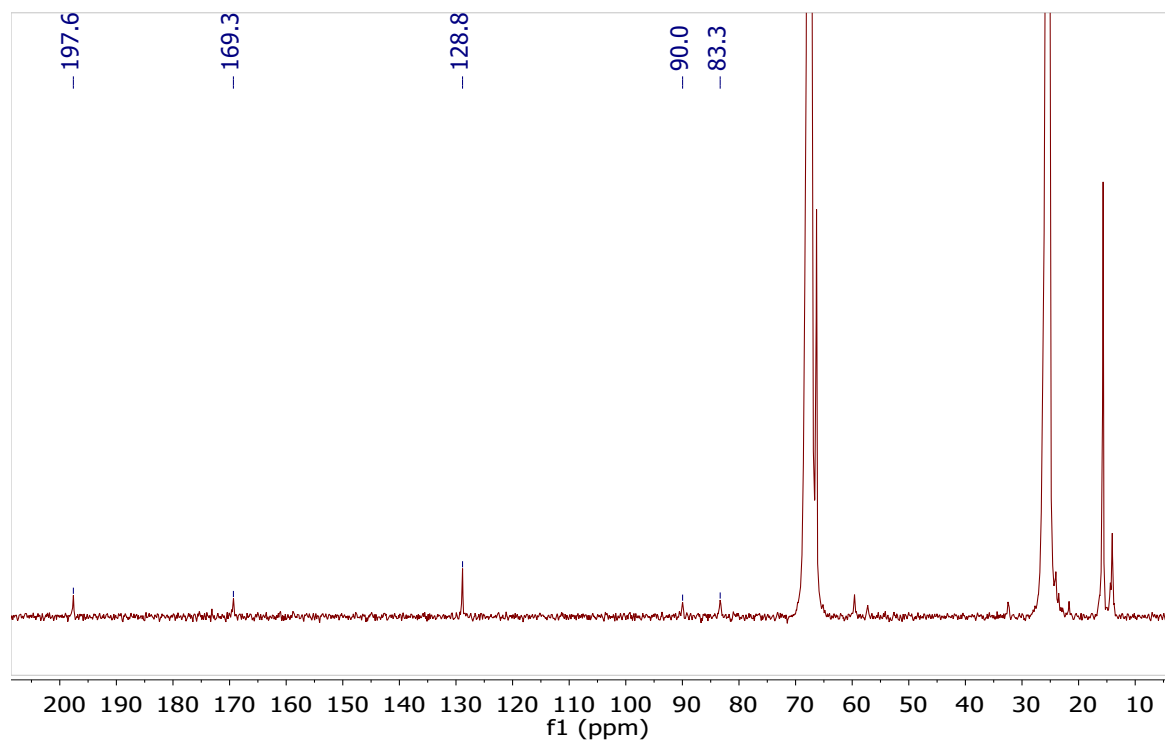

Fig. S25.  $^{13}\text{C}$ -( $^1\text{H}$ -dec) NMR of **12** in tetrahydrofuran- $d_8$ . Coordinated diethyl ether is seen at 15.7 and 66.3 ppm. Trace n-butyllithium is seen at 14.0, 21.7, and 32.5 ppm.



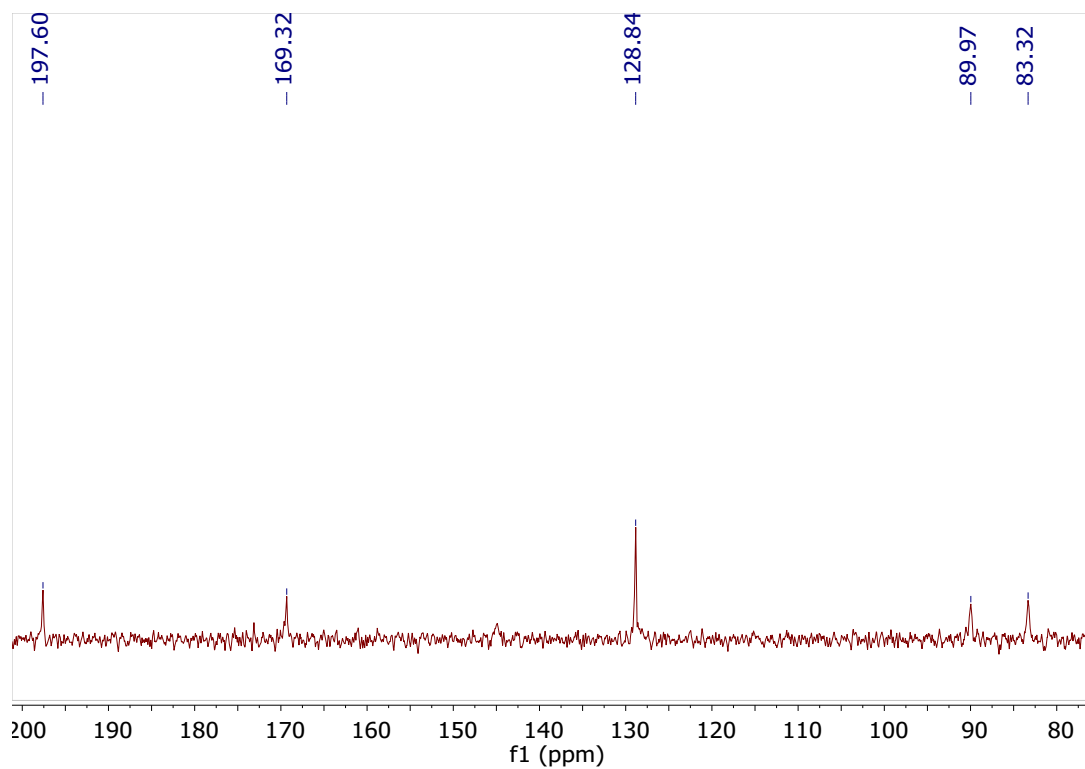

Fig. S26. An expanded view of the <sup>13</sup>C-(<sup>1</sup>H-dec) NMR spectrum of **12** in tetrahydrofuran-d<sub>8</sub>.

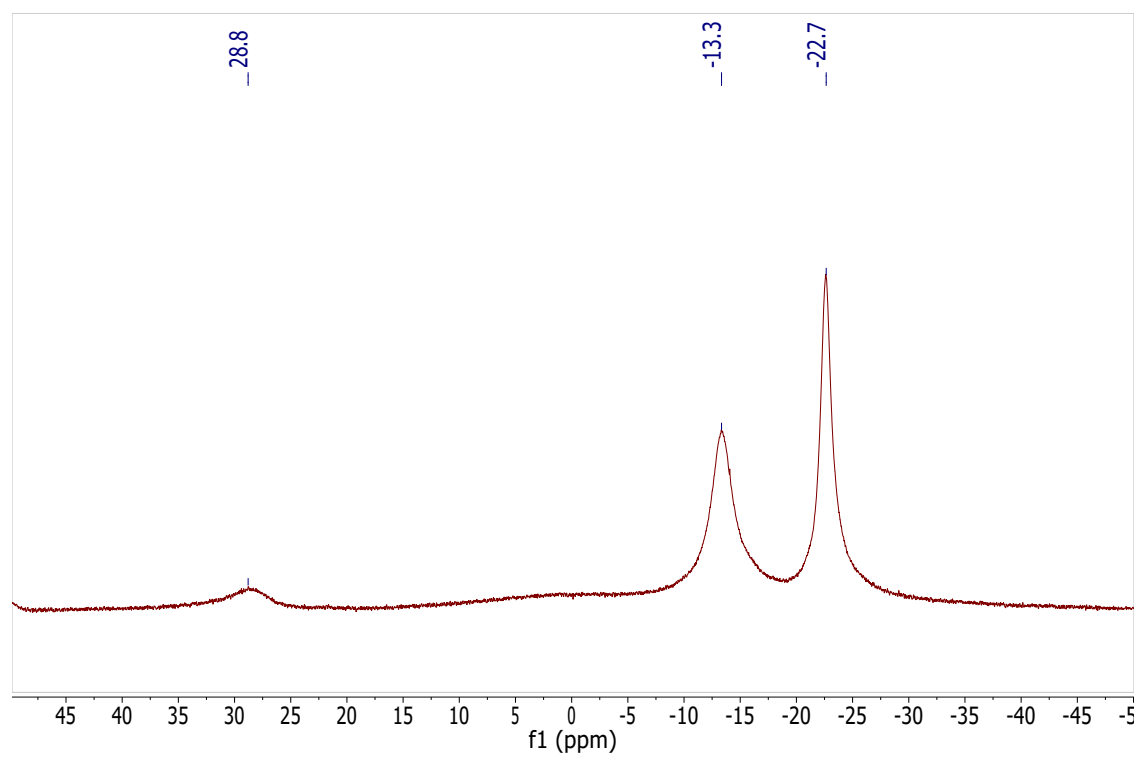

Fig. S27.  $^{11}\text{B}$ -( $^1\text{H}$ -dec) NMR of **12** in tetrahydrofuran- $\text{d}_8$ .

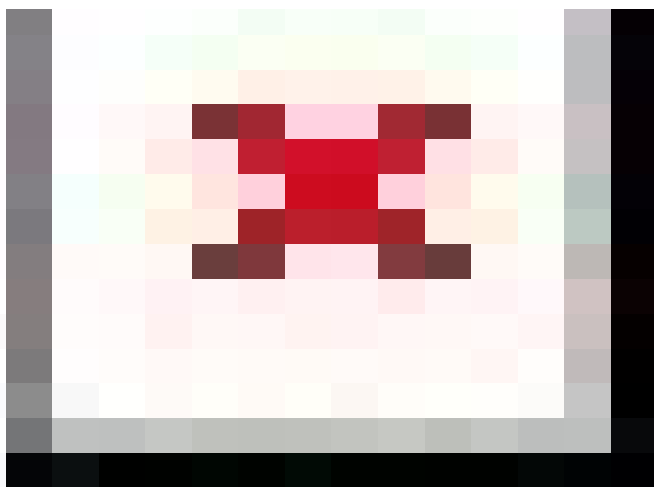

Fig. S28. Solid-state structure of the 10-Vertex NHC dianion **10**[ $\text{K}^+$ ]. Boron = brown, carbon= gray, nitrogen= blue, potassium= purple. For clarity, tetrahydrofuran molecules coordinated to the potassium atoms are omitted. One potassium cation is bound to the deprotonated position of the N-heterocyclic carbene, while the other potassium cation is coordinated to the carborane cluster. The line drawn between the potassium cation and the cluster does not represent a sigma bond. The potassium atom bound to the NHC has three THF molecules coordinated to it, while the potassium coordinated to the carborane cluster is also coordinating to the cluster of another NHC molecule, and possesses two THF molecules.

### X-Ray Structure Determination for **10**[ $\text{K}^+$ ]

A colorless prism fragment (0.589 x 0.559 x 0.478 mm<sup>3</sup>) was used for the single crystal x-ray diffraction study of  $[\text{C}_5\text{H}_{20}\text{B}_{18}\text{N}_2\text{K}_2] \cdot [\text{C}_4\text{H}_8\text{O}]_7$  (sample vL157SL\_70A\_0m). The crystal was coated with paratone oil and mounted on to a cryo-loop glass fiber. X-ray intensity data were collected at 200(2) K on a Bruker APEX2 platform-CCD x-ray diffractometer system (fine focus Mo-radiation,  $\lambda = 0.71073 \text{ \AA}$ , 50KV/30mA power). The CCD detector was placed at a distance of 7.0900 cm from the crystal.

A total of 6600 frames were collected for a sphere of reflections (with scan width of  $0.3^\circ$  in  $\omega$ , starting  $\omega/2\theta$  angles at  $-24^\circ/-24^\circ$  with  $\phi$  angles of  $0^\circ, 90^\circ, 120^\circ, 225^\circ$ , and starting  $\omega/2\theta$  angles at  $-29^\circ/-29^\circ$  with  $\phi$  angles of  $0^\circ, 30^\circ, 60^\circ, 90^\circ, 180^\circ, 240^\circ, 270^\circ$  for every 600 frames, 60 sec/frame exposure time). The frames were integrated using the Bruker SAINT software package and using a narrow-frame integration algorithm. Based on an orthorhombic crystal system, the integrated frames yielded a total of 129683 reflections at a maximum  $2\theta$  angle of  $52.044^\circ$  ( $0.81 \text{ \AA}$  resolution), of which 10591 were independent reflections ( $R_{\text{int}} = 0.0275$ ,  $R_{\text{sig}} = 0.0132$ , redundancy = 12.2,

completeness = 99.9%) and 9804 (92.6%) reflections were greater than  $2\sigma(I)$ . The unit cell parameters were,  $\mathbf{a} = 60.9506(58) \text{ \AA}$ ,  $\mathbf{b} = 17.6644(17) \text{ \AA}$ ,  $\mathbf{c} = 9.8809(10) \text{ \AA}$ ,  $\alpha = \beta = \gamma = 90^\circ$ ,  $V = 10638.3(18) \text{ \AA}^3$ ,  $Z = 8$ , calculated density  $D_c = 1.106 \text{ g/cm}^3$ . Absorption corrections were applied (absorption coefficient  $\mu = 0.219 \text{ mm}^{-1}$ ; max/min transmission = 0.903/0.882) to the raw intensity data using the SADABS program.

The Bruker SHELXTL software package was used for phase determination and structure refinement. The distribution of intensities ( $E^2-1 = 0.721$ ) and systematic absent reflections indicated three possible space groups,  $Cmc2(1)$ ,  $Cmcm$ , and  $Ama2$ . The space group  $Ama2$  (#40) was later determined to be correct. Direct methods of phase determination followed by two Fourier cycles of refinement led to an electron density map from which most of the non-hydrogen atoms were identified in the asymmetric unit of the unit cell. With subsequent isotropic refinement, all of the non-hydrogen atoms were identified. There was one polymeric structure of  $C_5H_{20}B_{18}N_2K_3$  and seven  $C_4H_8O$  solvent molecules present in the asymmetric unit of the unit cell. Five of the seven THF molecules were modeled with disorder (disordered site occupancy ratios were 75%/25%, 70%/30%, 58%/42%, 53%/47% and 50%/50%). The K2 atom and three disordered-THF molecules were located at the mirror plane perpendicular to the a-axis. The K3 atom and two disordered-THF molecule were located at the 2-fold rotation axis parallel to the c-axis. The polymeric chain is propagated along the a-axis. The level B-alerts are probably due to the poor crystal quality and the five highly disordered THF molecules where rigid model restraints were used. The crystal cracks at 100K due to low temperature phase transition and data was collected at 200K.

Atomic coordinates, isotropic and anisotropic displacement parameters of all the non-hydrogen atoms were refined by means of a full matrix least-squares procedure on  $F^2$ . The H-atoms were included in the refinement in calculated positions riding on the atoms to which they were attached. The absolute structure Flack's parameter  $x = 0.038(5)$ . The refinement converged at  $R1 = 0.0590$ ,  $wR2 = 0.1698$ , with intensity,  $I > 2\sigma(I)$ . The largest peak/hole in the final difference map was  $0.589/-0.311 \text{ e/\AA}^3$ .

**Table S1.** Crystal data and structure refinement for  $Ama2$ .

|                      |                               |                       |
|----------------------|-------------------------------|-----------------------|
| Identification code  | vL157SL_70A_0m                |                       |
| Empirical formula    | C33 H76 B18 K2 N2 O7          |                       |
| Formula weight       | 885.73                        |                       |
| Temperature          | 200(2) K                      |                       |
| Wavelength           | 0.71073 \AA                   |                       |
| Crystal system       | Orthorhombic                  |                       |
| Space group          | A m a 2                       |                       |
| Unit cell dimensions | $a = 60.951(6) \text{ \AA}$   | $\alpha = 90^\circ$ . |
|                      | $b = 17.6644(17) \text{ \AA}$ | $\beta = 90^\circ$ .  |
|                      | $c = 9.8809(10) \text{ \AA}$  | $\gamma = 90^\circ$ . |

|                                   |                                             |
|-----------------------------------|---------------------------------------------|
| Volume                            | 10638.3(18) Å <sup>3</sup>                  |
| Z                                 | 8                                           |
| Density (calculated)              | 1.106 Mg/m <sup>3</sup>                     |
| Absorption coefficient            | 0.219 mm <sup>-1</sup>                      |
| F(000)                            | 3776                                        |
| Crystal size                      | 0.589 x 0.559 x 0.478 mm <sup>3</sup>       |
| Theta range for data collection   | 2.005 to 26.022°.                           |
| Index ranges                      | -75<=h<=75, -21<=k<=21, -12<=l<=12          |
| Reflections collected             | 129683                                      |
| Independent reflections           | 10591 [R(int) = 0.0275]                     |
| Completeness to theta = 25.242°   | 99.9 %                                      |
| Absorption correction             | Semi-empirical from equivalents             |
| Refinement method                 | Full-matrix least-squares on F <sup>2</sup> |
| Data / restraints / parameters    | 10591 / 971 / 775                           |
| Goodness-of-fit on F <sup>2</sup> | 1.100                                       |
| Final R indices [I>2sigma(I)]     | R1 = 0.0590, wR2 = 0.1698                   |
| R indices (all data)              | R1 = 0.0630, wR2 = 0.1747                   |
| Absolute structure parameter      | 0.038(5)                                    |
| Extinction coefficient            | n/a                                         |
| Largest diff. peak and hole       | 0.589 and -0.311 e.Å <sup>-3</sup>          |

**Table S2.** Atomic coordinates ( $\times 10^4$ ) and equivalent isotropic displacement parameters ( $\text{\AA}^2 \times 10^3$ )

for Ama2.  $U(\text{eq})$  is defined as one third of the trace of the orthogonalized  $U_{ij}$  tensor.

|        | x       | y        | z        | $U(\text{eq})$ |
|--------|---------|----------|----------|----------------|
| K(1)   | 1187(1) | 501(1)   | 5984(1)  | 67(1)          |
| N(1)   | 1426(1) | -812(2)  | 2980(3)  | 53(1)          |
| C(2)   | 1249(1) | -447(2)  | 3509(4)  | 53(1)          |
| N(3)   | 1116(1) | -385(2)  | 2405(3)  | 52(1)          |
| C(4)   | 1206(1) | -683(3)  | 1240(5)  | 66(1)          |
| C(5)   | 1405(1) | -954(3)  | 1611(5)  | 66(1)          |
| C(1A)  | 1619(1) | -1004(2) | 3732(4)  | 52(1)          |
| B(2A)  | 1852(1) | -578(2)  | 3623(5)  | 56(1)          |
| B(3A)  | 1805(1) | -1594(3) | 3320(6)  | 64(1)          |
| B(4A)  | 1640(1) | -1660(3) | 4874(6)  | 67(1)          |
| B(5A)  | 1684(1) | -656(3)  | 5176(6)  | 61(1)          |
| B(6A)  | 1981(1) | -602(2)  | 5255(6)  | 62(1)          |
| B(7A)  | 2068(1) | -1255(3) | 3924(6)  | 64(1)          |
| B(8A)  | 1918(1) | -2022(3) | 4813(7)  | 72(1)          |
| B(9A)  | 1832(1) | -1352(3) | 6153(6)  | 72(1)          |
| B(10A) | 2096(1) | -1452(3) | 5597(7)  | 71(1)          |
| C(1B)  | 903(1)  | -54(2)   | 2444(4)  | 49(1)          |
| B(2B)  | 833(1)  | 729(2)   | 3160(5)  | 60(1)          |
| B(3B)  | 719(1)  | -211(2)  | 3567(4)  | 54(1)          |
| B(4B)  | 688(1)  | -411(2)  | 1745(4)  | 50(1)          |
| B(5B)  | 804(1)  | 528(3)   | 1344(5)  | 62(1)          |
| B(6B)  | 615(1)  | 1155(3)  | 2201(6)  | 68(1)          |
| B(7B)  | 555(1)  | 627(3)   | 3769(5)  | 62(1)          |
| B(8B)  | 451(1)  | -164(3)  | 2760(4)  | 55(1)          |
| B(9B)  | 516(1)  | 355(3)   | 1195(5)  | 58(1)          |
| B(10B) | 371(1)  | 743(3)   | 2511(5)  | 62(1)          |
| O(1T)  | 1034(1) | -608(2)  | 7685(5)  | 94(1)          |
| C(1T)  | 804(1)  | -727(4)  | 7741(6)  | 97(2)          |
| C(2T)  | 764(1)  | -1537(4) | 7605(14) | 151(4)         |
| C(3T)  | 979(1)  | -1896(4) | 7613(17) | 172(5)         |

|        |         |           |           |        |
|--------|---------|-----------|-----------|--------|
| C(4T)  | 1137(1) | -1307(4)  | 7375(10)  | 112(2) |
| O(2T)  | 935(1)  | 1598(3)   | 7080(6)   | 116(2) |
| C(5T)  | 724(1)  | 1622(5)   | 7667(10)  | 122(2) |
| C(6T)  | 714(1)  | 2319(4)   | 8490(8)   | 109(2) |
| C(7T)  | 933(2)  | 2630(4)   | 8422(13)  | 144(4) |
| C(8T)  | 1020(2) | 2303(5)   | 7165(14)  | 177(5) |
| O(3T)  | 1495(1) | 956(6)    | 7851(8)   | 88(2)  |
| C(9T)  | 1725(1) | 1068(6)   | 7724(9)   | 90(3)  |
| C(10T) | 1831(2) | 606(12)   | 8789(17)  | 152(5) |
| C(11T) | 1662(3) | 526(14)   | 9875(14)  | 152(5) |
| C(12T) | 1447(2) | 806(15)   | 9240(15)  | 149(6) |
| O(3U)  | 1475(3) | 545(11)   | 8106(15)  | 122(5) |
| C(9U)  | 1668(3) | 160(11)   | 8590(20)  | 134(6) |
| C(10U) | 1765(2) | 658(10)   | 9670(20)  | 122(6) |
| C(11U) | 1559(3) | 1040(8)   | 10239(11) | 101(4) |
| C(12U) | 1417(3) | 1149(11)  | 8996(16)  | 111(6) |
| O(4T)  | 1420(1) | 1555(4)   | 4596(9)   | 107(3) |
| C(13T) | 1535(2) | 2219(7)   | 5087(13)  | 140(4) |
| C(14T) | 1761(2) | 2173(9)   | 4463(12)  | 146(5) |
| C(15T) | 1725(2) | 1722(6)   | 3184(12)  | 126(3) |
| C(16T) | 1496(2) | 1441(6)   | 3253(10)  | 126(3) |
| O(4U)  | 1471(3) | 1578(13)  | 5240(20)  | 115(7) |
| C(13U) | 1703(3) | 1588(13)  | 5360(20)  | 113(7) |
| C(14U) | 1782(4) | 1837(19)  | 3940(30)  | 124(9) |
| C(15U) | 1603(5) | 2433(18)  | 3630(30)  | 154(9) |
| C(16U) | 1399(3) | 1970(20)  | 4060(30)  | 130(9) |
| K(2)   | 2500    | -305(1)   | 5428(2)   | 76(1)  |
| O(5T)  | 75(2)   | -1423(4)  | -120(30)  | 112(6) |
| C(17T) | 251(2)  | -1958(9)  | 80(40)    | 146(8) |
| C(18T) | 145(3)  | -2711(7)  | 390(20)   | 125(6) |
| C(19T) | -95(3)  | -2608(10) | 80(30)    | 132(6) |
| C(20T) | -106(3) | -1863(9)  | -670(30)  | 126(7) |
| O(5U)  | 73(2)   | -1487(5)  | 260(30)   | 111(5) |
| C(17U) | 241(2)  | -1892(8)  | 520(20)   | 114(5) |
| C(18U) | 218(3)  | -2630(10) | -260(30)  | 162(8) |
| C(19U) | -19(3)  | -2667(7)  | -640(30)  | 127(6) |

|        |         |           |           |         |
|--------|---------|-----------|-----------|---------|
| C(20U) | -116(2) | -1918(9)  | -240(30)  | 122(7)  |
| O(6T)  | 26(3)   | 165(11)   | -2044(7)  | 118(6)  |
| C(21T) | 232(2)  | -127(13)  | -2533(14) | 134(4)  |
| C(22T) | 184(2)  | -545(10)  | -3820(13) | 122(5)  |
| C(23T) | -18(4)  | -130(20)  | -4350(11) | 133(9)  |
| C(24T) | -136(2) | 127(14)   | -3081(14) | 134(4)  |
| K(3)   | 0       | 0         | 679(1)    | 63(1)   |
| O(7T)  | 2500    | 459(6)    | 3035(11)  | 94(3)   |
| C(25T) | 2310(1) | 838(6)    | 2568(16)  | 106(4)  |
| C(26T) | 2379(1) | 1644(5)   | 2270(20)  | 125(5)  |
| O(7U)  | 2500    | 712(14)   | 3400(20)  | 94(3)   |
| C(25U) | 2311(1) | 1107(17)  | 2890(20)  | 124(9)  |
| C(26U) | 2377(1) | 1370(20)  | 1490(20)  | 120(8)  |
| O(8T)  | 2500    | 1178(7)   | 6100(20)  | 125(6)  |
| C(29T) | 2310(1) | 1314(17)  | 6930(20)  | 184(9)  |
| C(30T) | 2379(1) | 1864(14)  | 8000(20)  | 193(11) |
| O(8U)  | 2500    | 1073(9)   | 6590(40)  | 144(8)  |
| C(29U) | 2311(1) | 1566(10)  | 6670(30)  | 169(9)  |
| C(30U) | 2378(1) | 2191(15)  | 7610(40)  | 205(12) |
| O(9T)  | 2529(4) | -473(7)   | 8199(11)  | 153(6)  |
| C(33T) | 2319(4) | -515(14)  | 8880(30)  | 166(8)  |
| C(34T) | 2329(4) | -1272(14) | 9610(20)  | 210(11) |
| C(35T) | 2568(4) | -1291(16) | 10070(20) | 220(11) |
| C(36T) | 2690(4) | -838(17)  | 9040(30)  | 179(8)  |

---

**Table S3.** Bond lengths [ $\text{\AA}$ ] and angles [ $^\circ$ ] for Ama2.

|             |           |               |          |
|-------------|-----------|---------------|----------|
| K(1)-O(4U)  | 2.673(11) | B(5A)-B(6A)   | 1.810(6) |
| K(1)-O(2T)  | 2.700(4)  | B(5A)-H(5A)   | 1.1200   |
| K(1)-O(4T)  | 2.713(6)  | B(6A)-B(10A)  | 1.692(6) |
| K(1)-O(3U)  | 2.733(12) | B(6A)-B(7A)   | 1.828(7) |
| K(1)-O(1T)  | 2.745(4)  | B(6A)-B(9A)   | 1.835(7) |
| K(1)-O(3T)  | 2.749(7)  | B(6A)-H(6A)   | 1.1200   |
| K(1)-C(2)   | 2.987(4)  | B(7A)-B(10A)  | 1.699(8) |
| N(1)-C(2)   | 1.363(5)  | B(7A)-B(8A)   | 1.854(7) |
| N(1)-C(5)   | 1.382(6)  | B(7A)-H(7A)   | 1.1200   |
| N(1)-C(1A)  | 1.432(5)  | B(8A)-B(10A)  | 1.672(7) |
| C(2)-N(3)   | 1.363(5)  | B(8A)-B(9A)   | 1.851(9) |
| N(3)-C(4)   | 1.381(6)  | B(8A)-H(8A)   | 1.1200   |
| N(3)-C(1B)  | 1.425(5)  | B(9A)-B(10A)  | 1.709(7) |
| C(4)-C(5)   | 1.351(6)  | B(9A)-H(9A)   | 1.1200   |
| C(4)-H(4)   | 0.9500    | B(10A)-H(10A) | 1.1200   |
| C(5)-H(5)   | 0.9500    | C(1B)-B(3B)   | 1.602(6) |
| C(1A)-B(3A) | 1.596(5)  | C(1B)-B(4B)   | 1.608(5) |
| C(1A)-B(5A) | 1.603(6)  | C(1B)-B(2B)   | 1.610(5) |
| C(1A)-B(2A) | 1.611(5)  | C(1B)-B(5B)   | 1.612(6) |
| C(1A)-B(4A) | 1.622(6)  | B(2B)-B(6B)   | 1.799(6) |
| B(2A)-B(6A) | 1.794(7)  | B(2B)-B(7B)   | 1.808(7) |
| B(2A)-B(7A) | 1.800(6)  | B(2B)-B(5B)   | 1.839(7) |
| B(2A)-B(3A) | 1.842(6)  | B(2B)-B(3B)   | 1.846(6) |
| B(2A)-B(5A) | 1.848(7)  | B(2B)-H(2B)   | 1.1200   |
| B(2A)-H(2A) | 1.1200    | B(3B)-B(7B)   | 1.795(6) |
| B(3A)-B(8A) | 1.793(8)  | B(3B)-B(8B)   | 1.819(6) |
| B(3A)-B(7A) | 1.808(7)  | B(3B)-B(4B)   | 1.844(6) |
| B(3A)-B(4A) | 1.841(8)  | B(3B)-H(3B)   | 1.1200   |
| B(3A)-H(3A) | 1.1200    | B(4B)-B(9B)   | 1.795(6) |
| B(4A)-B(9A) | 1.807(7)  | B(4B)-B(8B)   | 1.813(6) |
| B(4A)-B(8A) | 1.813(7)  | B(4B)-B(5B)   | 1.845(6) |
| B(4A)-B(5A) | 1.819(7)  | B(4B)-H(4B)   | 1.1200   |
| B(4A)-H(4A) | 1.1200    | B(5B)-B(9B)   | 1.787(6) |
| B(5A)-B(9A) | 1.805(7)  | B(5B)-B(6B)   | 1.809(7) |



|               |           |               |           |
|---------------|-----------|---------------|-----------|
| B(5B)-H(5B)   | 1.1200    | C(7T)-H(7C)   | 0.9900    |
| B(6B)-B(10B)  | 1.686(7)  | C(7T)-H(7D)   | 0.9900    |
| B(6B)-B(9B)   | 1.829(7)  | C(8T)-H(8C)   | 0.9900    |
| B(6B)-B(7B)   | 1.844(8)  | C(8T)-H(8D)   | 0.9900    |
| B(6B)-H(6B)   | 1.1200    | O(3T)-C(9T)   | 1.422(9)  |
| B(7B)-B(10B)  | 1.690(6)  | O(3T)-C(12T)  | 1.427(11) |
| B(7B)-B(8B)   | 1.832(6)  | C(9T)-C(10T)  | 1.481(11) |
| B(7B)-H(7B)   | 1.1200    | C(9T)-H(9C)   | 0.9900    |
| B(8B)-B(10B)  | 1.692(7)  | C(9T)-H(9D)   | 0.9900    |
| B(8B)-B(9B)   | 1.841(7)  | C(10T)-C(11T) | 1.496(12) |
| B(8B)-H(8B)   | 1.1200    | C(10T)-H(10C) | 0.9900    |
| B(9B)-B(10B)  | 1.717(6)  | C(10T)-H(10D) | 0.9900    |
| B(9B)-H(9B)   | 1.1200    | C(11T)-C(12T) | 1.533(12) |
| B(10B)-H(10B) | 1.1200    | C(11T)-H(11A) | 0.9900    |
| O(1T)-C(1T)   | 1.417(7)  | C(11T)-H(11B) | 0.9900    |
| O(1T)-C(4T)   | 1.421(7)  | C(12T)-H(12A) | 0.9900    |
| C(1T)-C(2T)   | 1.457(8)  | C(12T)-H(12B) | 0.9900    |
| C(1T)-H(1A)   | 0.9900    | O(3U)-C(12U)  | 1.428(12) |
| C(1T)-H(1B)   | 0.9900    | O(3U)-C(9U)   | 1.438(12) |
| C(2T)-C(3T)   | 1.457(9)  | C(9U)-C(10U)  | 1.510(12) |
| C(2T)-H(2C)   | 0.9900    | C(9U)-H(9E)   | 0.9900    |
| C(2T)-H(2D)   | 0.9900    | C(9U)-H(9F)   | 0.9900    |
| C(3T)-C(4T)   | 1.440(8)  | C(10U)-C(11U) | 1.527(12) |
| C(3T)-H(3C)   | 0.9900    | C(10U)-H(10E) | 0.9900    |
| C(3T)-H(3D)   | 0.9900    | C(10U)-H(10F) | 0.9900    |
| C(4T)-H(4C)   | 0.9900    | C(11U)-C(12U) | 1.517(12) |
| C(4T)-H(4D)   | 0.9900    | C(11U)-H(11C) | 0.9900    |
| O(2T)-C(8T)   | 1.351(11) | C(11U)-H(11D) | 0.9900    |
| O(2T)-C(5T)   | 1.415(9)  | C(12U)-H(12C) | 0.9900    |
| C(5T)-C(6T)   | 1.476(10) | C(12U)-H(12D) | 0.9900    |
| C(5T)-H(5C)   | 0.9900    | O(4T)-C(16T)  | 1.419(10) |
| C(5T)-H(5D)   | 0.9900    | O(4T)-C(13T)  | 1.448(9)  |
| C(6T)-C(7T)   | 1.447(11) | C(13T)-C(14T) | 1.511(11) |
| C(6T)-H(6C)   | 0.9900    | C(13T)-H(13A) | 0.9900    |
| C(6T)-H(6D)   | 0.9900    | C(13T)-H(13B) | 0.9900    |
| C(7T)-C(8T)   | 1.467(15) | C(14T)-C(15T) | 1.510(11) |

|               |           |               |           |
|---------------|-----------|---------------|-----------|
| C(14T)-H(14A) | 0.9900    | C(18T)-H(18A) | 0.9900    |
| C(14T)-H(14B) | 0.9900    | C(18T)-H(18B) | 0.9900    |
| C(15T)-C(16T) | 1.483(10) | C(19T)-C(20T) | 1.515(13) |
| C(15T)-H(15A) | 0.9900    | C(19T)-H(19A) | 0.9900    |
| C(15T)-H(15B) | 0.9900    | C(19T)-H(19B) | 0.9900    |
| C(16T)-H(16A) | 0.9900    | C(20T)-H(20A) | 0.9900    |
| C(16T)-H(16B) | 0.9900    | C(20T)-H(20B) | 0.9900    |
| O(4U)-C(13U)  | 1.419(12) | O(5U)-C(17U)  | 1.278(16) |
| O(4U)-C(16U)  | 1.428(13) | O(5U)-C(20U)  | 1.463(16) |
| C(13U)-C(14U) | 1.545(13) | O(5U)-K(3)    | 2.696(7)  |
| C(13U)-H(13C) | 0.9900    | C(17U)-C(18U) | 1.522(12) |
| C(13U)-H(13D) | 0.9900    | C(17U)-H(17C) | 0.9900    |
| C(14U)-C(15U) | 1.548(14) | C(17U)-H(17D) | 0.9900    |
| C(14U)-H(14C) | 0.9900    | C(18U)-C(19U) | 1.497(11) |
| C(14U)-H(14D) | 0.9900    | C(18U)-H(18C) | 0.9900    |
| C(15U)-C(16U) | 1.549(14) | C(18U)-H(18D) | 0.9900    |
| C(15U)-H(15C) | 0.9900    | C(19U)-C(20U) | 1.504(12) |
| C(15U)-H(15D) | 0.9900    | C(19U)-H(19C) | 0.9900    |
| C(16U)-H(16C) | 0.9900    | C(19U)-H(19D) | 0.9900    |
| C(16U)-H(16D) | 0.9900    | C(20U)-H(20C) | 0.9900    |
| K(2)-O(8U)    | 2.690(10) | C(20U)-H(20D) | 0.9900    |
| K(2)-O(7U)    | 2.692(11) | O(6T)-C(24T)  | 1.423(11) |
| K(2)-O(8T)    | 2.704(10) | O(6T)-C(21T)  | 1.441(12) |
| K(2)-O(7T)    | 2.722(8)  | O(6T)-K(3)    | 2.711(8)  |
| K(2)-O(9T)    | 2.760(12) | C(21T)-C(22T) | 1.500(12) |
| K(2)-B(10A)#1 | 3.192(5)  | C(21T)-H(21A) | 0.9900    |
| K(2)-B(6A)#1  | 3.212(4)  | C(21T)-H(21B) | 0.9900    |
| K(2)-C(29T)#1 | 3.43(2)   | C(22T)-C(23T) | 1.526(13) |
| K(2)-B(7A)#1  | 3.460(5)  | C(22T)-H(22A) | 0.9900    |
| O(5T)-C(17T)  | 1.443(13) | C(22T)-H(22B) | 0.9900    |
| O(5T)-C(20T)  | 1.456(13) | C(23T)-C(24T) | 1.512(12) |
| O(5T)-K(3)    | 2.672(9)  | C(23T)-H(23A) | 0.9900    |
| C(17T)-C(18T) | 1.510(12) | C(23T)-H(23B) | 0.9900    |
| C(17T)-H(17A) | 0.9900    | C(24T)-H(24A) | 0.9900    |
| C(17T)-H(17B) | 0.9900    | C(24T)-H(24B) | 0.9900    |
| C(18T)-C(19T) | 1.499(12) | K(3)-O(5T)#2  | 2.672(9)  |

|                 |           |                  |            |
|-----------------|-----------|------------------|------------|
| K(3)-O(5U)#2    | 2.696(7)  | O(9T)-C(36T)     | 1.439(12)  |
| K(3)-B(10B)#2   | 3.178(5)  | O(9T)-C(33T)     | 1.445(12)  |
| K(3)-B(9B)#2    | 3.247(4)  | C(33T)-C(34T)    | 1.520(13)  |
| K(3)-B(8B)#2    | 3.443(4)  | C(33T)-H(33A)    | 0.9900     |
| O(7T)-C(25T)#1  | 1.416(7)  | C(33T)-H(33B)    | 0.9900     |
| O(7T)-C(25T)    | 1.416(7)  | C(34T)-C(35T)    | 1.527(13)  |
| C(25T)-C(26T)   | 1.514(8)  | C(34T)-H(34A)    | 0.9900     |
| C(25T)-H(25A)   | 0.9900    | C(34T)-H(34B)    | 0.9900     |
| C(25T)-H(25B)   | 0.9900    | C(35T)-C(36T)    | 1.499(12)  |
| C(26T)-C(26T)#1 | 1.478(11) | C(35T)-H(35A)    | 0.9900     |
| C(26T)-H(26A)   | 0.9900    | C(35T)-H(35B)    | 0.9900     |
| C(26T)-H(26B)   | 0.9900    | C(36T)-H(36A)    | 0.9900     |
| O(7U)-C(25U)#1  | 1.440(9)  | C(36T)-H(36B)    | 0.9900     |
| O(7U)-C(25U)    | 1.440(9)  |                  |            |
| C(25U)-C(26U)   | 1.517(9)  | O(4U)-K(1)-O(2T) | 88.1(6)    |
| C(25U)-H(25C)   | 0.9900    | O(2T)-K(1)-O(4T) | 90.47(19)  |
| C(25U)-H(25D)   | 0.9900    | O(4U)-K(1)-O(3U) | 77.0(7)    |
| C(26U)-C(26U)#1 | 1.498(13) | O(2T)-K(1)-O(3U) | 92.1(3)    |
| C(26U)-H(26C)   | 0.9900    | O(4U)-K(1)-O(1T) | 153.6(5)   |
| C(26U)-H(26D)   | 0.9900    | O(2T)-K(1)-O(1T) | 94.12(14)  |
| O(8T)-C(29T)#1  | 1.441(9)  | O(4T)-K(1)-O(1T) | 167.8(2)   |
| O(8T)-C(29T)    | 1.441(9)  | O(3U)-K(1)-O(1T) | 76.6(5)    |
| C(29T)-C(30T)   | 1.497(9)  | O(2T)-K(1)-O(3T) | 84.8(2)    |
| C(29T)-H(29A)   | 0.9900    | O(4T)-K(1)-O(3T) | 77.4(3)    |
| C(29T)-H(29B)   | 0.9900    | O(1T)-K(1)-O(3T) | 91.7(2)    |
| C(30T)-C(30T)#1 | 1.476(12) | O(4U)-K(1)-C(2)  | 95.4(6)    |
| C(30T)-H(30A)   | 0.9900    | O(2T)-K(1)-C(2)  | 143.29(15) |
| C(30T)-H(30B)   | 0.9900    | O(4T)-K(1)-C(2)  | 84.60(17)  |
| O(8U)-C(29U)#1  | 1.446(9)  | O(3U)-K(1)-C(2)  | 124.3(3)   |
| O(8U)-C(29U)    | 1.446(9)  | O(1T)-K(1)-C(2)  | 98.27(12)  |
| C(29U)-C(30U)   | 1.504(9)  | O(3T)-K(1)-C(2)  | 128.9(2)   |
| C(29U)-H(29C)   | 0.9900    | C(2)-N(1)-C(5)   | 112.8(3)   |
| C(29U)-H(29D)   | 0.9900    | C(2)-N(1)-C(1A)  | 124.4(3)   |
| C(30U)-C(30U)#1 | 1.487(13) | C(5)-N(1)-C(1A)  | 122.8(3)   |
| C(30U)-H(30C)   | 0.9900    | N(1)-C(2)-N(3)   | 101.7(3)   |
| C(30U)-H(30D)   | 0.9900    | N(1)-C(2)-K(1)   | 132.7(2)   |

|                   |          |                   |          |
|-------------------|----------|-------------------|----------|
| N(3)-C(2)-K(1)    | 122.4(2) | C(1A)-B(3A)-B(7A) | 109.2(3) |
| C(2)-N(3)-C(4)    | 113.5(3) | B(8A)-B(3A)-B(7A) | 62.0(3)  |
| C(2)-N(3)-C(1B)   | 123.6(3) | C(1A)-B(3A)-B(4A) | 55.7(3)  |
| C(4)-N(3)-C(1B)   | 122.9(3) | B(8A)-B(3A)-B(4A) | 59.8(3)  |
| C(5)-C(4)-N(3)    | 105.5(4) | B(7A)-B(3A)-B(4A) | 103.3(4) |
| C(5)-C(4)-H(4)    | 127.2    | C(1A)-B(3A)-B(2A) | 55.3(2)  |
| N(3)-C(4)-H(4)    | 127.2    | B(8A)-B(3A)-B(2A) | 102.6(3) |
| C(4)-C(5)-N(1)    | 106.6(4) | B(7A)-B(3A)-B(2A) | 59.1(2)  |
| C(4)-C(5)-H(5)    | 126.7    | B(4A)-B(3A)-B(2A) | 90.6(3)  |
| N(1)-C(5)-H(5)    | 126.7    | C(1A)-B(3A)-H(3A) | 121.3    |
| N(1)-C(1A)-B(3A)  | 127.4(3) | B(8A)-B(3A)-H(3A) | 120.1    |
| N(1)-C(1A)-B(5A)  | 125.1(3) | B(7A)-B(3A)-H(3A) | 120.3    |
| B(3A)-C(1A)-B(5A) | 107.5(3) | B(4A)-B(3A)-H(3A) | 130.2    |
| N(1)-C(1A)-B(2A)  | 125.4(3) | B(2A)-B(3A)-H(3A) | 131.0    |
| B(3A)-C(1A)-B(2A) | 70.1(3)  | C(1A)-B(4A)-B(9A) | 108.8(3) |
| B(5A)-C(1A)-B(2A) | 70.2(3)  | C(1A)-B(4A)-B(8A) | 107.6(4) |
| N(1)-C(1A)-B(4A)  | 126.4(3) | B(9A)-B(4A)-B(8A) | 61.5(3)  |
| B(3A)-C(1A)-B(4A) | 69.8(3)  | C(1A)-B(4A)-B(5A) | 55.2(3)  |
| B(5A)-C(1A)-B(4A) | 68.7(3)  | B(9A)-B(4A)-B(5A) | 59.7(3)  |
| B(2A)-C(1A)-B(4A) | 108.1(3) | B(8A)-B(4A)-B(5A) | 102.1(3) |
| C(1A)-B(2A)-B(6A) | 108.3(3) | C(1A)-B(4A)-B(3A) | 54.4(3)  |
| C(1A)-B(2A)-B(7A) | 108.8(3) | B(9A)-B(4A)-B(3A) | 102.0(3) |
| B(6A)-B(2A)-B(7A) | 61.1(3)  | B(8A)-B(4A)-B(3A) | 58.8(3)  |
| C(1A)-B(2A)-B(3A) | 54.6(2)  | B(5A)-B(4A)-B(3A) | 89.6(3)  |
| B(6A)-B(2A)-B(3A) | 101.0(3) | C(1A)-B(4A)-H(4A) | 122.2    |
| B(7A)-B(2A)-B(3A) | 59.5(2)  | B(9A)-B(4A)-H(4A) | 120.4    |
| C(1A)-B(2A)-B(5A) | 54.7(2)  | B(8A)-B(4A)-H(4A) | 121.2    |
| B(6A)-B(2A)-B(5A) | 59.6(3)  | B(5A)-B(4A)-H(4A) | 130.7    |
| B(7A)-B(2A)-B(5A) | 102.5(3) | B(3A)-B(4A)-H(4A) | 131.4    |
| B(3A)-B(2A)-B(5A) | 88.7(3)  | C(1A)-B(5A)-B(9A) | 109.8(3) |
| C(1A)-B(2A)-H(2A) | 121.9    | C(1A)-B(5A)-B(6A) | 107.9(3) |
| B(6A)-B(2A)-H(2A) | 121.1    | B(9A)-B(5A)-B(6A) | 61.0(3)  |
| B(7A)-B(2A)-H(2A) | 120.3    | C(1A)-B(5A)-B(4A) | 56.1(3)  |
| B(3A)-B(2A)-H(2A) | 131.9    | B(9A)-B(5A)-B(4A) | 59.8(3)  |
| B(5A)-B(2A)-H(2A) | 131.1    | B(6A)-B(5A)-B(4A) | 102.0(3) |
| C(1A)-B(3A)-B(8A) | 109.7(4) | C(1A)-B(5A)-B(2A) | 55.1(2)  |

|                    |          |                    |          |
|--------------------|----------|--------------------|----------|
| B(9A)-B(5A)-B(2A)  | 102.6(3) | B(6A)-B(7A)-H(7A)  | 131.6    |
| B(6A)-B(5A)-B(2A)  | 58.7(3)  | B(8A)-B(7A)-H(7A)  | 132.0    |
| B(4A)-B(5A)-B(2A)  | 91.1(3)  | B(10A)-B(8A)-B(3A) | 112.1(4) |
| C(1A)-B(5A)-H(5A)  | 121.4    | B(10A)-B(8A)-B(4A) | 112.3(4) |
| B(9A)-B(5A)-H(5A)  | 120.2    | B(3A)-B(8A)-B(4A)  | 61.4(3)  |
| B(6A)-B(5A)-H(5A)  | 121.6    | B(10A)-B(8A)-B(9A) | 57.8(3)  |
| B(4A)-B(5A)-H(5A)  | 130.1    | B(3A)-B(8A)-B(9A)  | 102.2(3) |
| B(2A)-B(5A)-H(5A)  | 130.7    | B(4A)-B(8A)-B(9A)  | 59.1(3)  |
| B(10A)-B(6A)-B(2A) | 112.4(4) | B(10A)-B(8A)-B(7A) | 57.3(3)  |
| B(10A)-B(6A)-B(5A) | 112.1(3) | B(3A)-B(8A)-B(7A)  | 59.4(3)  |
| B(2A)-B(6A)-B(5A)  | 61.7(3)  | B(4A)-B(8A)-B(7A)  | 102.6(3) |
| B(10A)-B(6A)-B(7A) | 57.5(3)  | B(9A)-B(8A)-B(7A)  | 90.6(3)  |
| B(2A)-B(6A)-B(7A)  | 59.6(3)  | B(10A)-B(8A)-H(8A) | 118.2    |
| B(5A)-B(6A)-B(7A)  | 102.9(3) | B(3A)-B(8A)-H(8A)  | 120.2    |
| B(10A)-B(6A)-B(9A) | 57.8(3)  | B(4A)-B(8A)-H(8A)  | 120.0    |
| B(2A)-B(6A)-B(9A)  | 103.6(3) | B(9A)-B(8A)-H(8A)  | 130.9    |
| B(5A)-B(6A)-B(9A)  | 59.3(3)  | B(7A)-B(8A)-H(8A)  | 130.8    |
| B(7A)-B(6A)-B(9A)  | 92.0(3)  | B(10A)-B(9A)-B(5A) | 111.6(4) |
| B(10A)-B(6A)-H(6A) | 118.4    | B(10A)-B(9A)-B(4A) | 110.8(4) |
| B(2A)-B(6A)-H(6A)  | 119.6    | B(5A)-B(9A)-B(4A)  | 60.5(3)  |
| B(5A)-B(6A)-H(6A)  | 120.1    | B(10A)-B(9A)-B(6A) | 56.9(3)  |
| B(7A)-B(6A)-H(6A)  | 130.3    | B(5A)-B(9A)-B(6A)  | 59.7(3)  |
| B(9A)-B(6A)-H(6A)  | 130.0    | B(4A)-B(9A)-B(6A)  | 101.5(4) |
| B(10A)-B(7A)-B(2A) | 111.8(4) | B(10A)-B(9A)-B(8A) | 55.9(3)  |
| B(10A)-B(7A)-B(3A) | 110.1(4) | B(5A)-B(9A)-B(8A)  | 101.2(4) |
| B(2A)-B(7A)-B(3A)  | 61.4(2)  | B(4A)-B(9A)-B(8A)  | 59.4(3)  |
| B(10A)-B(7A)-B(6A) | 57.2(3)  | B(6A)-B(9A)-B(8A)  | 88.6(3)  |
| B(2A)-B(7A)-B(6A)  | 59.3(3)  | B(10A)-B(9A)-H(9A) | 119.2    |
| B(3A)-B(7A)-B(6A)  | 101.0(3) | B(5A)-B(9A)-H(9A)  | 120.4    |
| B(10A)-B(7A)-B(8A) | 55.9(3)  | B(4A)-B(9A)-H(9A)  | 120.7    |
| B(2A)-B(7A)-B(8A)  | 101.8(3) | B(6A)-B(9A)-H(9A)  | 131.4    |
| B(3A)-B(7A)-B(8A)  | 58.6(3)  | B(8A)-B(9A)-H(9A)  | 132.1    |
| B(6A)-B(7A)-B(8A)  | 88.7(3)  | B(8A)-B(10A)-B(6A) | 99.9(3)  |
| B(10A)-B(7A)-H(7A) | 119.3    | B(8A)-B(10A)-B(7A) | 66.7(4)  |
| B(2A)-B(7A)-H(7A)  | 119.9    | B(6A)-B(10A)-B(7A) | 65.2(3)  |
| B(3A)-B(7A)-H(7A)  | 121.1    | B(8A)-B(10A)-B(9A) | 66.4(3)  |

|                     |          |                   |          |
|---------------------|----------|-------------------|----------|
| B(6A)-B(10A)-B(9A)  | 65.3(3)  | B(8B)-B(3B)-B(4B) | 59.3(2)  |
| B(7A)-B(10A)-B(9A)  | 101.2(4) | C(1B)-B(3B)-B(2B) | 55.1(2)  |
| B(8A)-B(10A)-H(10A) | 129.5    | B(7B)-B(3B)-B(2B) | 59.5(3)  |
| B(6A)-B(10A)-H(10A) | 130.7    | B(8B)-B(3B)-B(2B) | 101.7(3) |
| B(7A)-B(10A)-H(10A) | 129.3    | B(4B)-B(3B)-B(2B) | 89.9(3)  |
| B(9A)-B(10A)-H(10A) | 129.5    | C(1B)-B(3B)-H(3B) | 121.7    |
| N(3)-C(1B)-B(3B)    | 125.9(3) | B(7B)-B(3B)-H(3B) | 120.7    |
| N(3)-C(1B)-B(4B)    | 124.7(3) | B(8B)-B(3B)-H(3B) | 121.0    |
| B(3B)-C(1B)-B(4B)   | 70.1(2)  | B(4B)-B(3B)-H(3B) | 130.9    |
| N(3)-C(1B)-B(2B)    | 127.1(3) | B(2B)-B(3B)-H(3B) | 131.0    |
| B(3B)-C(1B)-B(2B)   | 70.2(3)  | C(1B)-B(4B)-B(9B) | 108.0(3) |
| B(4B)-C(1B)-B(2B)   | 108.2(3) | C(1B)-B(4B)-B(8B) | 108.5(3) |
| N(3)-C(1B)-B(5B)    | 125.6(3) | B(9B)-B(4B)-B(8B) | 61.4(3)  |
| B(3B)-C(1B)-B(5B)   | 108.5(3) | C(1B)-B(4B)-B(3B) | 54.8(2)  |
| B(4B)-C(1B)-B(5B)   | 69.9(3)  | B(9B)-B(4B)-B(3B) | 102.1(3) |
| B(2B)-C(1B)-B(5B)   | 69.6(3)  | B(8B)-B(4B)-B(3B) | 59.6(2)  |
| C(1B)-B(2B)-B(6B)   | 108.7(3) | C(1B)-B(4B)-B(5B) | 55.1(2)  |
| C(1B)-B(2B)-B(7B)   | 107.8(3) | B(9B)-B(4B)-B(5B) | 58.8(2)  |
| B(6B)-B(2B)-B(7B)   | 61.5(3)  | B(8B)-B(4B)-B(5B) | 102.0(3) |
| C(1B)-B(2B)-B(5B)   | 55.3(2)  | B(3B)-B(4B)-B(5B) | 90.0(3)  |
| B(6B)-B(2B)-B(5B)   | 59.6(3)  | C(1B)-B(4B)-H(4B) | 122.1    |
| B(7B)-B(2B)-B(5B)   | 102.4(3) | B(9B)-B(4B)-H(4B) | 121.0    |
| C(1B)-B(2B)-B(3B)   | 54.7(2)  | B(8B)-B(4B)-H(4B) | 120.6    |
| B(6B)-B(2B)-B(3B)   | 102.1(3) | B(3B)-B(4B)-H(4B) | 130.8    |
| B(7B)-B(2B)-B(3B)   | 58.9(3)  | B(5B)-B(4B)-H(4B) | 131.0    |
| B(5B)-B(2B)-B(3B)   | 90.1(3)  | C(1B)-B(5B)-B(9B) | 108.2(3) |
| C(1B)-B(2B)-H(2B)   | 122.1    | C(1B)-B(5B)-B(6B) | 108.2(4) |
| B(6B)-B(2B)-H(2B)   | 120.5    | B(9B)-B(5B)-B(6B) | 61.1(3)  |
| B(7B)-B(2B)-H(2B)   | 121.0    | C(1B)-B(5B)-B(2B) | 55.1(2)  |
| B(5B)-B(2B)-H(2B)   | 130.5    | B(9B)-B(5B)-B(2B) | 102.0(3) |
| B(3B)-B(2B)-H(2B)   | 131.2    | B(6B)-B(5B)-B(2B) | 59.1(3)  |
| C(1B)-B(3B)-B(7B)   | 108.8(3) | C(1B)-B(5B)-B(4B) | 54.9(2)  |
| C(1B)-B(3B)-B(8B)   | 108.5(3) | B(9B)-B(5B)-B(4B) | 59.2(2)  |
| B(7B)-B(3B)-B(8B)   | 60.9(2)  | B(6B)-B(5B)-B(4B) | 101.8(3) |
| C(1B)-B(3B)-B(4B)   | 55.1(2)  | B(2B)-B(5B)-B(4B) | 90.1(3)  |
| B(7B)-B(3B)-B(4B)   | 102.1(3) | C(1B)-B(5B)-H(5B) | 122.0    |

|                    |          |                     |          |
|--------------------|----------|---------------------|----------|
| B(9B)-B(5B)-H(5B)  | 120.9    | B(4B)-B(8B)-B(3B)   | 61.0(2)  |
| B(6B)-B(5B)-H(5B)  | 121.1    | B(10B)-B(8B)-B(7B)  | 57.1(3)  |
| B(2B)-B(5B)-H(5B)  | 130.8    | B(4B)-B(8B)-B(7B)   | 101.9(3) |
| B(4B)-B(5B)-H(5B)  | 130.9    | B(3B)-B(8B)-B(7B)   | 58.9(2)  |
| B(10B)-B(6B)-B(2B) | 112.2(4) | B(10B)-B(8B)-B(9B)  | 58.0(3)  |
| B(10B)-B(6B)-B(5B) | 112.6(3) | B(4B)-B(8B)-B(9B)   | 58.8(2)  |
| B(2B)-B(6B)-B(5B)  | 61.3(3)  | B(3B)-B(8B)-B(9B)   | 101.3(3) |
| B(10B)-B(6B)-B(9B) | 58.3(3)  | B(7B)-B(8B)-B(9B)   | 90.1(3)  |
| B(2B)-B(6B)-B(9B)  | 102.0(3) | B(10B)-B(8B)-H(8B)  | 118.3    |
| B(5B)-B(6B)-B(9B)  | 58.8(3)  | B(4B)-B(8B)-H(8B)   | 120.3    |
| B(10B)-B(6B)-B(7B) | 57.0(3)  | B(3B)-B(8B)-H(8B)   | 120.8    |
| B(2B)-B(6B)-B(7B)  | 59.5(3)  | B(7B)-B(8B)-H(8B)   | 131.2    |
| B(5B)-B(6B)-B(7B)  | 102.1(3) | B(9B)-B(8B)-H(8B)   | 131.2    |
| B(9B)-B(6B)-B(7B)  | 90.1(3)  | B(10B)-B(9B)-B(5B)  | 112.2(3) |
| B(10B)-B(6B)-H(6B) | 118.0    | B(10B)-B(9B)-B(4B)  | 111.9(3) |
| B(2B)-B(6B)-H(6B)  | 120.2    | B(5B)-B(9B)-B(4B)   | 62.0(2)  |
| B(5B)-B(6B)-H(6B)  | 120.2    | B(10B)-B(9B)-B(6B)  | 56.7(3)  |
| B(9B)-B(6B)-H(6B)  | 131.1    | B(5B)-B(9B)-B(6B)   | 60.0(3)  |
| B(7B)-B(6B)-H(6B)  | 131.3    | B(4B)-B(9B)-B(6B)   | 103.0(3) |
| B(10B)-B(7B)-B(3B) | 112.8(3) | B(10B)-B(9B)-B(8B)  | 56.7(3)  |
| B(10B)-B(7B)-B(2B) | 111.6(4) | B(5B)-B(9B)-B(8B)   | 103.2(3) |
| B(3B)-B(7B)-B(2B)  | 61.7(3)  | B(4B)-B(9B)-B(8B)   | 59.8(2)  |
| B(10B)-B(7B)-B(8B) | 57.3(3)  | B(6B)-B(9B)-B(8B)   | 90.0(3)  |
| B(3B)-B(7B)-B(8B)  | 60.2(2)  | B(10B)-B(9B)-H(9B)  | 119.0    |
| B(2B)-B(7B)-B(8B)  | 102.8(3) | B(5B)-B(9B)-H(9B)   | 119.3    |
| B(10B)-B(7B)-B(6B) | 56.8(3)  | B(4B)-B(9B)-H(9B)   | 119.6    |
| B(3B)-B(7B)-B(6B)  | 102.4(3) | B(6B)-B(9B)-H(9B)   | 131.0    |
| B(2B)-B(7B)-B(6B)  | 59.0(3)  | B(8B)-B(9B)-H(9B)   | 131.0    |
| B(8B)-B(7B)-B(6B)  | 89.8(3)  | B(6B)-B(10B)-B(7B)  | 66.2(3)  |
| B(10B)-B(7B)-H(7B) | 118.6    | B(6B)-B(10B)-B(8B)  | 100.4(3) |
| B(3B)-B(7B)-H(7B)  | 119.4    | B(7B)-B(10B)-B(8B)  | 65.6(3)  |
| B(2B)-B(7B)-H(7B)  | 120.1    | B(6B)-B(10B)-B(9B)  | 65.0(3)  |
| B(8B)-B(7B)-H(7B)  | 130.7    | B(7B)-B(10B)-B(9B)  | 99.5(3)  |
| B(6B)-B(7B)-H(7B)  | 131.6    | B(8B)-B(10B)-B(9B)  | 65.4(3)  |
| B(10B)-B(8B)-B(4B) | 112.2(3) | B(6B)-B(10B)-H(10B) | 129.7    |
| B(10B)-B(8B)-B(3B) | 111.5(3) | B(7B)-B(10B)-H(10B) | 129.9    |

|                     |          |                      |           |
|---------------------|----------|----------------------|-----------|
| B(8B)-B(10B)-H(10B) | 129.9    | C(6T)-C(5T)-H(5D)    | 110.4     |
| B(9B)-B(10B)-H(10B) | 130.6    | H(5C)-C(5T)-H(5D)    | 108.6     |
| C(1T)-O(1T)-C(4T)   | 108.5(5) | C(7T)-C(6T)-C(5T)    | 104.6(6)  |
| C(1T)-O(1T)-K(1)    | 117.9(4) | C(7T)-C(6T)-H(6C)    | 110.8     |
| C(4T)-O(1T)-K(1)    | 109.7(4) | C(5T)-C(6T)-H(6C)    | 110.8     |
| O(1T)-C(1T)-C(2T)   | 108.0(5) | C(7T)-C(6T)-H(6D)    | 110.8     |
| O(1T)-C(1T)-H(1A)   | 110.1    | C(5T)-C(6T)-H(6D)    | 110.8     |
| C(2T)-C(1T)-H(1A)   | 110.1    | H(6C)-C(6T)-H(6D)    | 108.9     |
| O(1T)-C(1T)-H(1B)   | 110.1    | C(6T)-C(7T)-C(8T)    | 102.9(8)  |
| C(2T)-C(1T)-H(1B)   | 110.1    | C(6T)-C(7T)-H(7C)    | 111.2     |
| H(1A)-C(1T)-H(1B)   | 108.4    | C(8T)-C(7T)-H(7C)    | 111.2     |
| C(3T)-C(2T)-C(1T)   | 106.0(5) | C(6T)-C(7T)-H(7D)    | 111.2     |
| C(3T)-C(2T)-H(2C)   | 110.5    | C(8T)-C(7T)-H(7D)    | 111.2     |
| C(1T)-C(2T)-H(2C)   | 110.5    | H(7C)-C(7T)-H(7D)    | 109.1     |
| C(3T)-C(2T)-H(2D)   | 110.5    | O(2T)-C(8T)-C(7T)    | 106.1(7)  |
| C(1T)-C(2T)-H(2D)   | 110.5    | O(2T)-C(8T)-H(8C)    | 110.5     |
| H(2C)-C(2T)-H(2D)   | 108.7    | C(7T)-C(8T)-H(8C)    | 110.5     |
| C(4T)-C(3T)-C(2T)   | 106.7(5) | O(2T)-C(8T)-H(8D)    | 110.5     |
| C(4T)-C(3T)-H(3C)   | 110.4    | C(7T)-C(8T)-H(8D)    | 110.5     |
| C(2T)-C(3T)-H(3C)   | 110.4    | H(8C)-C(8T)-H(8D)    | 108.7     |
| C(4T)-C(3T)-H(3D)   | 110.4    | C(9T)-O(3T)-C(12T)   | 108.1(7)  |
| C(2T)-C(3T)-H(3D)   | 110.4    | C(9T)-O(3T)-K(1)     | 130.8(6)  |
| H(3C)-C(3T)-H(3D)   | 108.6    | C(12T)-O(3T)-K(1)    | 116.9(10) |
| O(1T)-C(4T)-C(3T)   | 107.2(5) | O(3T)-C(9T)-C(10T)   | 107.1(7)  |
| O(1T)-C(4T)-H(4C)   | 110.3    | O(3T)-C(9T)-H(9C)    | 110.3     |
| C(3T)-C(4T)-H(4C)   | 110.3    | C(10T)-C(9T)-H(9C)   | 110.3     |
| O(1T)-C(4T)-H(4D)   | 110.3    | O(3T)-C(9T)-H(9D)    | 110.3     |
| C(3T)-C(4T)-H(4D)   | 110.3    | C(10T)-C(9T)-H(9D)   | 110.3     |
| H(4C)-C(4T)-H(4D)   | 108.5    | H(9C)-C(9T)-H(9D)    | 108.6     |
| C(8T)-O(2T)-C(5T)   | 107.1(6) | C(9T)-C(10T)-C(11T)  | 105.0(7)  |
| C(8T)-O(2T)-K(1)    | 118.0(5) | C(9T)-C(10T)-H(10C)  | 110.8     |
| C(5T)-O(2T)-K(1)    | 134.9(4) | C(11T)-C(10T)-H(10C) | 110.8     |
| O(2T)-C(5T)-C(6T)   | 106.8(6) | C(9T)-C(10T)-H(10D)  | 110.8     |
| O(2T)-C(5T)-H(5C)   | 110.4    | C(11T)-C(10T)-H(10D) | 110.8     |
| C(6T)-C(5T)-H(5C)   | 110.4    | H(10C)-C(10T)-H(10D) | 108.8     |
| O(2T)-C(5T)-H(5D)   | 110.4    | C(10T)-C(11T)-C(12T) | 105.4(7)  |



|                      |          |                      |           |
|----------------------|----------|----------------------|-----------|
| C(10T)-C(11T)-H(11A) | 110.7    | C(11U)-C(12U)-H(12D) | 110.7     |
| C(12T)-C(11T)-H(11A) | 110.7    | H(12C)-C(12U)-H(12D) | 108.8     |
| C(10T)-C(11T)-H(11B) | 110.7    | C(16T)-O(4T)-C(13T)  | 105.8(6)  |
| C(12T)-C(11T)-H(11B) | 110.7    | C(16T)-O(4T)-K(1)    | 123.0(5)  |
| H(11A)-C(11T)-H(11B) | 108.8    | C(13T)-O(4T)-K(1)    | 129.7(7)  |
| O(3T)-C(12T)-C(11T)  | 106.2(7) | O(4T)-C(13T)-C(14T)  | 105.0(7)  |
| O(3T)-C(12T)-H(12A)  | 110.5    | O(4T)-C(13T)-H(13A)  | 110.7     |
| C(11T)-C(12T)-H(12A) | 110.5    | C(14T)-C(13T)-H(13A) | 110.7     |
| O(3T)-C(12T)-H(12B)  | 110.5    | O(4T)-C(13T)-H(13B)  | 110.7     |
| C(11T)-C(12T)-H(12B) | 110.5    | C(14T)-C(13T)-H(13B) | 110.7     |
| H(12A)-C(12T)-H(12B) | 108.7    | H(13A)-C(13T)-H(13B) | 108.8     |
| C(12U)-O(3U)-C(9U)   | 110.6(7) | C(15T)-C(14T)-C(13T) | 103.6(6)  |
| C(12U)-O(3U)-K(1)    | 109.6(8) | C(15T)-C(14T)-H(14A) | 111.0     |
| C(9U)-O(3U)-K(1)     | 139.8(8) | C(13T)-C(14T)-H(14A) | 111.0     |
| O(3U)-C(9U)-C(10U)   | 106.3(8) | C(15T)-C(14T)-H(14B) | 111.0     |
| O(3U)-C(9U)-H(9E)    | 110.5    | C(13T)-C(14T)-H(14B) | 111.0     |
| C(10U)-C(9U)-H(9E)   | 110.5    | H(14A)-C(14T)-H(14B) | 109.0     |
| O(3U)-C(9U)-H(9F)    | 110.5    | C(16T)-C(15T)-C(14T) | 106.1(6)  |
| C(10U)-C(9U)-H(9F)   | 110.5    | C(16T)-C(15T)-H(15A) | 110.5     |
| H(9E)-C(9U)-H(9F)    | 108.7    | C(14T)-C(15T)-H(15A) | 110.5     |
| C(9U)-C(10U)-C(11U)  | 101.4(8) | C(16T)-C(15T)-H(15B) | 110.5     |
| C(9U)-C(10U)-H(10E)  | 111.5    | C(14T)-C(15T)-H(15B) | 110.5     |
| C(11U)-C(10U)-H(10E) | 111.5    | H(15A)-C(15T)-H(15B) | 108.7     |
| C(9U)-C(10U)-H(10F)  | 111.5    | O(4T)-C(16T)-C(15T)  | 107.4(7)  |
| C(11U)-C(10U)-H(10F) | 111.5    | O(4T)-C(16T)-H(16A)  | 110.2     |
| H(10E)-C(10U)-H(10F) | 109.3    | C(15T)-C(16T)-H(16A) | 110.2     |
| C(12U)-C(11U)-C(10U) | 103.3(8) | O(4T)-C(16T)-H(16B)  | 110.2     |
| C(12U)-C(11U)-H(11C) | 111.1    | C(15T)-C(16T)-H(16B) | 110.2     |
| C(10U)-C(11U)-H(11C) | 111.1    | H(16A)-C(16T)-H(16B) | 108.5     |
| C(12U)-C(11U)-H(11D) | 111.1    | C(13U)-O(4U)-C(16U)  | 111.4(8)  |
| C(10U)-C(11U)-H(11D) | 111.1    | C(13U)-O(4U)-K(1)    | 129.2(14) |
| H(11C)-C(11U)-H(11D) | 109.1    | C(16U)-O(4U)-K(1)    | 111.7(15) |
| O(3U)-C(12U)-C(11U)  | 105.2(8) | O(4U)-C(13U)-C(14U)  | 104.1(9)  |
| O(3U)-C(12U)-H(12C)  | 110.7    | O(4U)-C(13U)-H(13C)  | 110.9     |
| C(11U)-C(12U)-H(12C) | 110.7    | C(14U)-C(13U)-H(13C) | 110.9     |
| O(3U)-C(12U)-H(12D)  | 110.7    | O(4U)-C(13U)-H(13D)  | 110.9     |

|                        |            |                       |            |
|------------------------|------------|-----------------------|------------|
| C(14U)-C(13U)-H(13D)   | 110.9      | B(6A)#1-K(2)-C(29T)#1 | 79.95(17)  |
| H(13C)-C(13U)-H(13D)   | 109.0      | O(8U)-K(2)-B(7A)#1    | 128.4(2)   |
| C(13U)-C(14U)-C(15U)   | 98.9(10)   | O(7U)-K(2)-B(7A)#1    | 90.2(5)    |
| C(13U)-C(14U)-H(14C)   | 112.0      | O(8T)-K(2)-B(7A)#1    | 125.16(19) |
| C(15U)-C(14U)-H(14C)   | 112.0      | O(7T)-K(2)-B(7A)#1    | 82.4(2)    |
| C(13U)-C(14U)-H(14D)   | 112.0      | O(9T)-K(2)-B(7A)#1    | 109.0(5)   |
| C(15U)-C(14U)-H(14D)   | 112.0      | B(10A)#1-K(2)-B(7A)#1 | 29.24(15)  |
| H(14C)-C(14U)-H(14D)   | 109.7      | B(6A)#1-K(2)-B(7A)#1  | 31.53(12)  |
| C(14U)-C(15U)-C(16U)   | 98.7(10)   | C(29T)#1-K(2)-B(7A)#1 | 109.46(16) |
| C(14U)-C(15U)-H(15C)   | 112.0      | C(17T)-O(5T)-C(20T)   | 105.3(10)  |
| C(16U)-C(15U)-H(15C)   | 112.0      | C(17T)-O(5T)-K(3)     | 134.7(11)  |
| C(14U)-C(15U)-H(15D)   | 112.0      | C(20T)-O(5T)-K(3)     | 118.9(10)  |
| C(16U)-C(15U)-H(15D)   | 112.0      | O(5T)-C(17T)-C(18T)   | 106.6(9)   |
| H(15C)-C(15U)-H(15D)   | 109.7      | O(5T)-C(17T)-H(17A)   | 110.4      |
| O(4U)-C(16U)-C(15U)    | 103.6(9)   | C(18T)-C(17T)-H(17A)  | 110.4      |
| O(4U)-C(16U)-H(16C)    | 111.0      | O(5T)-C(17T)-H(17B)   | 110.4      |
| C(15U)-C(16U)-H(16C)   | 111.0      | C(18T)-C(17T)-H(17B)  | 110.4      |
| O(4U)-C(16U)-H(16D)    | 111.0      | H(17A)-C(17T)-H(17B)  | 108.6      |
| C(15U)-C(16U)-H(16D)   | 111.0      | C(19T)-C(18T)-C(17T)  | 105.7(7)   |
| H(16C)-C(16U)-H(16D)   | 109.0      | C(19T)-C(18T)-H(18A)  | 110.6      |
| O(8U)-K(2)-O(7U)       | 73.4(11)   | C(17T)-C(18T)-H(18A)  | 110.6      |
| O(8T)-K(2)-O(7T)       | 74.5(5)    | C(19T)-C(18T)-H(18B)  | 110.6      |
| O(8U)-K(2)-B(10A)#1    | 123.5(3)   | C(17T)-C(18T)-H(18B)  | 110.6      |
| O(7U)-K(2)-B(10A)#1    | 117.5(4)   | H(18A)-C(18T)-H(18B)  | 108.7      |
| O(8T)-K(2)-B(10A)#1    | 127.01(16) | C(18T)-C(19T)-C(20T)  | 104.5(8)   |
| O(7T)-K(2)-B(10A)#1    | 111.12(19) | C(18T)-C(19T)-H(19A)  | 110.9      |
| O(9T)-K(2)-B(10A)#1    | 80.3(5)    | C(20T)-C(19T)-H(19A)  | 110.9      |
| O(8U)-K(2)-B(6A)#1     | 99.79(9)   | C(18T)-C(19T)-H(19B)  | 110.9      |
| O(7U)-K(2)-B(6A)#1     | 93.97(15)  | C(20T)-C(19T)-H(19B)  | 110.9      |
| O(8T)-K(2)-B(6A)#1     | 99.85(8)   | H(19A)-C(19T)-H(19B)  | 108.9      |
| O(7T)-K(2)-B(6A)#1     | 91.99(11)  | O(5T)-C(20T)-C(19T)   | 104.1(10)  |
| O(9T)-K(2)-B(6A)#1     | 88.5(6)    | O(5T)-C(20T)-H(20A)   | 110.9      |
| B(10A)#1-K(2)-B(6A)#1  | 30.64(11)  | C(19T)-C(20T)-H(20A)  | 110.9      |
| O(8T)-K(2)-C(29T)#1    | 23.7(4)    | O(5T)-C(20T)-H(20B)   | 110.9      |
| O(7T)-K(2)-C(29T)#1    | 87.9(6)    | C(19T)-C(20T)-H(20B)  | 110.9      |
| B(10A)#1-K(2)-C(29T)#1 | 1104.2(3)  | H(20A)-C(20T)-H(20B)  | 108.9      |

|                      |           |                       |           |
|----------------------|-----------|-----------------------|-----------|
| C(17U)-O(5U)-C(20U)  | 114.1(9)  | C(21T)-C(22T)-C(23T)  | 102.3(9)  |
| C(17U)-O(5U)-K(3)    | 130.2(9)  | C(21T)-C(22T)-H(22A)  | 111.3     |
| C(20U)-O(5U)-K(3)    | 115.5(7)  | C(23T)-C(22T)-H(22A)  | 111.3     |
| O(5U)-C(17U)-C(18U)  | 107.5(10) | C(21T)-C(22T)-H(22B)  | 111.3     |
| O(5U)-C(17U)-H(17C)  | 110.2     | C(23T)-C(22T)-H(22B)  | 111.3     |
| C(18U)-C(17U)-H(17C) | 110.2     | H(22A)-C(22T)-H(22B)  | 109.2     |
| O(5U)-C(17U)-H(17D)  | 110.2     | C(24T)-C(23T)-C(22T)  | 103.9(8)  |
| C(18U)-C(17U)-H(17D) | 110.2     | C(24T)-C(23T)-H(23A)  | 111.0     |
| H(17C)-C(17U)-H(17D) | 108.5     | C(22T)-C(23T)-H(23A)  | 111.0     |
| C(19U)-C(18U)-C(17U) | 104.8(7)  | C(24T)-C(23T)-H(23B)  | 111.0     |
| C(19U)-C(18U)-H(18C) | 110.8     | C(22T)-C(23T)-H(23B)  | 111.0     |
| C(17U)-C(18U)-H(18C) | 110.8     | H(23A)-C(23T)-H(23B)  | 109.0     |
| C(19U)-C(18U)-H(18D) | 110.8     | O(6T)-C(24T)-C(23T)   | 106.5(8)  |
| C(17U)-C(18U)-H(18D) | 110.8     | O(6T)-C(24T)-H(24A)   | 110.4     |
| H(18C)-C(18U)-H(18D) | 108.9     | C(23T)-C(24T)-H(24A)  | 110.4     |
| C(18U)-C(19U)-C(20U) | 105.8(7)  | O(6T)-C(24T)-H(24B)   | 110.4     |
| C(18U)-C(19U)-H(19C) | 110.6     | C(23T)-C(24T)-H(24B)  | 110.4     |
| C(20U)-C(19U)-H(19C) | 110.6     | H(24A)-C(24T)-H(24B)  | 108.6     |
| C(18U)-C(19U)-H(19D) | 110.6     | O(5T)#2-K(3)-O(5T)    | 145.8(11) |
| C(20U)-C(19U)-H(19D) | 110.6     | O(5U)-K(3)-O(5U)#2    | 162.2(11) |
| H(19C)-C(19U)-H(19D) | 108.7     | O(5T)#2-K(3)-B(10B)#2 | 115.7(3)  |
| O(5U)-C(20U)-C(19U)  | 103.8(8)  | O(5T)-K(3)-B(10B)#2   | 84.3(5)   |
| O(5U)-C(20U)-H(20C)  | 111.0     | O(5U)-K(3)-B(10B)#2   | 78.6(5)   |
| C(19U)-C(20U)-H(20C) | 111.0     | O(5U)#2-K(3)-B(10B)#2 | 111.9(3)  |
| O(5U)-C(20U)-H(20D)  | 111.0     | O(6T)-K(3)-B(10B)#2   | 130.7(4)  |
| C(19U)-C(20U)-H(20D) | 111.0     | O(5T)#2-K(3)-B(9B)#2  | 93.6(3)   |
| H(20C)-C(20U)-H(20D) | 109.0     | O(5T)-K(3)-B(9B)#2    | 91.7(4)   |
| C(24T)-O(6T)-C(21T)  | 110.2(7)  | O(5U)-K(3)-B(9B)#2    | 89.7(3)   |
| C(24T)-O(6T)-K(3)    | 132.0(10) | O(5U)#2-K(3)-B(9B)#2  | 93.0(3)   |
| C(21T)-O(6T)-K(3)    | 110.2(9)  | O(6T)-K(3)-B(9B)#2    | 103.5(3)  |
| O(6T)-C(21T)-C(22T)  | 106.7(8)  | B(10B)#2-K(3)-B(9B)#2 | 30.96(12) |
| O(6T)-C(21T)-H(21A)  | 110.4     | O(5T)#2-K(3)-B(8B)#2  | 87.7(3)   |
| C(22T)-C(21T)-H(21A) | 110.4     | O(5T)-K(3)-B(8B)#2    | 113.0(5)  |
| O(6T)-C(21T)-H(21B)  | 110.4     | O(5U)-K(3)-B(8B)#2    | 107.8(4)  |
| C(22T)-C(21T)-H(21B) | 110.4     | O(5U)#2-K(3)-B(8B)#2  | 83.1(4)   |
| H(21A)-C(21T)-H(21B) | 108.6     | O(6T)-K(3)-B(8B)#2    | 129.1(4)  |

|                        |           |                        |           |
|------------------------|-----------|------------------------|-----------|
| B(10B)#2-K(3)-B(8B)#2  | 29.26(12) | O(8T)-C(29T)-H(29A)    | 110.5     |
| B(9B)#2-K(3)-B(8B)#2   | 31.77(11) | C(30T)-C(29T)-H(29A)   | 110.5     |
| C(25T)#1-O(7T)-C(25T)  | 109.9(7)  | O(8T)-C(29T)-H(29B)    | 110.4     |
| C(25T)#1-O(7T)-K(2)    | 121.2(6)  | C(30T)-C(29T)-H(29B)   | 110.5     |
| C(25T)-O(7T)-K(2)      | 121.2(6)  | H(29A)-C(29T)-H(29B)   | 108.6     |
| O(7T)-C(25T)-C(26T)    | 106.3(5)  | C(30T)#1-C(30T)-C(29T) | 106.4(4)  |
| O(7T)-C(25T)-H(25A)    | 110.5     | C(30T)#1-C(30T)-H(30A) | 110.4     |
| C(26T)-C(25T)-H(25A)   | 110.5     | C(29T)-C(30T)-H(30A)   | 110.4     |
| O(7T)-C(25T)-H(25B)    | 110.5     | C(30T)#1-C(30T)-H(30B) | 110.4     |
| C(26T)-C(25T)-H(25B)   | 110.5     | C(29T)-C(30T)-H(30B)   | 110.4     |
| H(25A)-C(25T)-H(25B)   | 108.7     | H(30A)-C(30T)-H(30B)   | 108.6     |
| C(26T)#1-C(26T)-C(25T) | 106.1(3)  | C(29U)#1-O(8U)-C(29U)  | 105.6(12) |
| C(26T)#1-C(26T)-H(26A) | 110.5     | C(29U)#1-O(8U)-K(2)    | 124.6(7)  |
| C(25T)-C(26T)-H(26A)   | 110.5     | C(29U)-O(8U)-K(2)      | 124.6(7)  |
| C(26T)#1-C(26T)-H(26B) | 110.5     | O(8U)-C(29U)-C(30U)    | 105.1(8)  |
| C(25T)-C(26T)-H(26B)   | 110.5     | O(8U)-C(29U)-H(29C)    | 110.7     |
| H(26A)-C(26T)-H(26B)   | 108.7     | C(30U)-C(29U)-H(29C)   | 110.7     |
| C(25U)#1-O(7U)-C(25U)  | 106.6(12) | O(8U)-C(29U)-H(29D)    | 110.7     |
| C(25U)#1-O(7U)-K(2)    | 125.7(5)  | C(30U)-C(29U)-H(29D)   | 110.7     |
| C(25U)-O(7U)-K(2)      | 125.7(5)  | H(29C)-C(29U)-H(29D)   | 108.8     |
| O(7U)-C(25U)-C(26U)    | 104.7(8)  | C(30U)#1-C(30U)-C(29U) | 105.8(4)  |
| O(7U)-C(25U)-H(25C)    | 110.8     | C(30U)#1-C(30U)-H(30C) | 110.6     |
| C(26U)-C(25U)-H(25C)   | 110.8     | C(29U)-C(30U)-H(30C)   | 110.6     |
| O(7U)-C(25U)-H(25D)    | 110.8     | C(30U)#1-C(30U)-H(30D) | 110.6     |
| C(26U)-C(25U)-H(25D)   | 110.8     | C(29U)-C(30U)-H(30D)   | 110.6     |
| H(25C)-C(25U)-H(25D)   | 108.9     | H(30C)-C(30U)-H(30D)   | 108.7     |
| C(26U)#1-C(26U)-C(25U) | 105.5(4)  | C(36T)-O(9T)-C(33T)    | 108.4(7)  |
| C(26U)#1-C(26U)-H(26C) | 110.6     | C(36T)-O(9T)-K(2)      | 131.4(14) |
| C(25U)-C(26U)-H(26C)   | 110.6     | C(33T)-O(9T)-K(2)      | 114.3(14) |
| C(26U)#1-C(26U)-H(26D) | 110.6     | O(9T)-C(33T)-C(34T)    | 103.3(9)  |
| C(25U)-C(26U)-H(26D)   | 110.6     | O(9T)-C(33T)-H(33A)    | 111.1     |
| H(26C)-C(26U)-H(26D)   | 108.8     | C(34T)-C(33T)-H(33A)   | 111.1     |
| C(29T)#1-O(8T)-C(29T)  | 107.2(11) | O(9T)-C(33T)-H(33B)    | 111.1     |
| C(29T)#1-O(8T)-K(2)    | 107.5(13) | C(34T)-C(33T)-H(33B)   | 111.1     |
| C(29T)-O(8T)-K(2)      | 107.5(13) | H(33A)-C(33T)-H(33B)   | 109.1     |
| O(8T)-C(29T)-C(30T)    | 106.4(7)  | C(33T)-C(34T)-C(35T)   | 101.5(10) |

|                      |          |                      |          |
|----------------------|----------|----------------------|----------|
| C(33T)-C(34T)-H(34A) | 111.5    | C(34T)-C(35T)-H(35B) | 110.8    |
| C(35T)-C(34T)-H(34A) | 111.5    | H(35A)-C(35T)-H(35B) | 108.8    |
| C(33T)-C(34T)-H(34B) | 111.5    | O(9T)-C(36T)-C(35T)  | 106.9(8) |
| C(35T)-C(34T)-H(34B) | 111.5    | O(9T)-C(36T)-H(36A)  | 110.4    |
| H(34A)-C(34T)-H(34B) | 109.3    | C(35T)-C(36T)-H(36A) | 110.4    |
| C(36T)-C(35T)-C(34T) | 104.9(8) | O(9T)-C(36T)-H(36B)  | 110.4    |
| C(36T)-C(35T)-H(35A) | 110.8    | C(35T)-C(36T)-H(36B) | 110.4    |
| C(34T)-C(35T)-H(35A) | 110.8    | H(36A)-C(36T)-H(36B) | 108.6    |
| C(36T)-C(35T)-H(35B) | 110.8    |                      |          |

---

Symmetry transformations used to generate equivalent atoms:

#1  $-x+1/2, y, z$  #2  $-x, -y, z$

**Table S4.** Anisotropic displacement parameters ( $\text{\AA}^2 \times 10^3$ ) for Ama2. The anisotropic displacement factor exponent takes the form:  $-2p^2[ h^2 a^*2U11 + \dots + 2 h k a^* b^* U12 ]$

|        | U11    | U22    | U33     | U23    | U13    | U12    |
|--------|--------|--------|---------|--------|--------|--------|
| K(1)   | 58(1)  | 68(1)  | 74(1)   | -20(1) | 2(1)   | 2(1)   |
| N(1)   | 42(1)  | 48(1)  | 69(2)   | -13(1) | -4(1)  | 2(1)   |
| C(2)   | 41(2)  | 47(2)  | 71(2)   | -14(2) | -8(2)  | 1(1)   |
| N(3)   | 43(2)  | 50(2)  | 63(2)   | -11(1) | -4(1)  | -4(1)  |
| C(4)   | 55(2)  | 79(3)  | 65(3)   | -13(2) | 1(2)   | 3(2)   |
| C(5)   | 54(2)  | 76(2)  | 67(2)   | -15(2) | 5(2)   | 10(2)  |
| C(1A)  | 38(2)  | 42(2)  | 76(2)   | -9(2)  | -2(2)  | 0(1)   |
| B(2A)  | 44(2)  | 47(2)  | 78(3)   | 1(2)   | -3(2)  | -4(2)  |
| B(3A)  | 53(2)  | 51(2)  | 87(3)   | -20(2) | -6(2)  | 7(2)   |
| B(4A)  | 53(2)  | 54(2)  | 94(3)   | 9(2)   | -8(2)  | -8(2)  |
| B(5A)  | 44(2)  | 60(2)  | 79(3)   | -9(2)  | -2(2)  | 6(2)   |
| B(6A)  | 46(2)  | 48(2)  | 90(3)   | -5(2)  | -12(2) | 3(2)   |
| B(7A)  | 43(2)  | 57(2)  | 93(3)   | -4(2)  | 2(2)   | 8(2)   |
| B(8A)  | 59(3)  | 47(2)  | 108(4)  | 5(2)   | -12(3) | 1(2)   |
| B(9A)  | 55(2)  | 82(3)  | 81(3)   | 8(3)   | -6(2)  | 5(2)   |
| B(10A) | 50(2)  | 57(2)  | 105(4)  | 10(2)  | -11(2) | 8(2)   |
| C(1B)  | 40(2)  | 50(2)  | 57(2)   | -8(1)  | -6(1)  | -5(1)  |
| B(2B)  | 49(2)  | 50(2)  | 81(3)   | -16(2) | -17(2) | 0(2)   |
| B(3B)  | 56(2)  | 58(2)  | 50(2)   | -9(2)  | -5(2)  | 1(2)   |
| B(4B)  | 40(2)  | 57(2)  | 54(2)   | -11(2) | 4(2)   | -10(2) |
| B(5B)  | 39(2)  | 66(2)  | 80(3)   | 12(2)  | -5(2)  | -3(2)  |
| B(6B)  | 49(2)  | 56(2)  | 97(3)   | 0(2)   | -14(2) | 2(2)   |
| B(7B)  | 58(2)  | 64(2)  | 64(3)   | -18(2) | -8(2)  | 9(2)   |
| B(8B)  | 45(2)  | 62(2)  | 56(2)   | -12(2) | 5(2)   | -6(2)  |
| B(9B)  | 38(2)  | 79(3)  | 58(2)   | -5(2)  | -6(2)  | -3(2)  |
| B(10B) | 45(2)  | 74(3)  | 69(3)   | -17(2) | -5(2)  | 7(2)   |
| O(1T)  | 88(2)  | 89(2)  | 106(3)  | -11(2) | 17(2)  | -5(2)  |
| C(1T)  | 90(4)  | 125(4) | 75(3)   | -19(3) | 12(3)  | -4(3)  |
| C(2T)  | 115(5) | 124(6) | 214(10) | -37(7) | 40(7)  | -40(5) |
| C(3T)  | 145(7) | 95(5)  | 276(14) | -23(7) | 0(9)   | -28(4) |
| C(4T)  | 95(4)  | 95(4)  | 145(6)  | -7(4)  | 19(4)  | 3(3)   |

|        |         |         |         |         |         |         |
|--------|---------|---------|---------|---------|---------|---------|
| O(2T)  | 125(4)  | 89(3)   | 133(4)  | -22(3)  | 39(3)   | 30(2)   |
| C(5T)  | 92(4)   | 130(5)  | 143(6)  | -41(5)  | -5(4)   | -4(4)   |
| C(6T)  | 103(4)  | 101(4)  | 122(5)  | -11(4)  | 30(4)   | 10(3)   |
| C(7T)  | 123(6)  | 76(4)   | 234(10) | -52(5)  | 22(6)   | -2(4)   |
| C(8T)  | 171(9)  | 94(5)   | 267(13) | 9(6)    | 127(9)  | 11(5)   |
| O(3T)  | 76(4)   | 121(6)  | 68(4)   | -18(4)  | -5(3)   | -16(4)  |
| C(9T)  | 78(5)   | 101(6)  | 91(6)   | -32(5)  | -4(4)   | -15(5)  |
| C(10T) | 128(8)  | 194(11) | 134(8)  | 38(8)   | -10(7)  | -16(8)  |
| C(11T) | 128(8)  | 194(11) | 134(8)  | 38(8)   | -10(7)  | -16(8)  |
| C(12T) | 130(9)  | 205(16) | 112(10) | 44(12)  | 19(8)   | -7(11)  |
| O(3U)  | 105(9)  | 164(14) | 98(9)   | -41(9)  | -12(7)  | 7(9)    |
| C(9U)  | 106(11) | 164(14) | 132(13) | -32(10) | 4(9)    | 14(9)   |
| C(10U) | 92(9)   | 132(12) | 140(13) | 24(10)  | -18(9)  | -43(8)  |
| C(11U) | 139(11) | 92(9)   | 72(7)   | 4(6)    | -15(7)  | -43(8)  |
| C(12U) | 99(10)  | 152(15) | 82(10)  | -6(10)  | 4(7)    | 12(9)   |
| O(4T)  | 96(4)   | 89(4)   | 138(7)  | -30(5)  | 37(5)   | -23(3)  |
| C(13T) | 133(8)  | 116(7)  | 170(9)  | -13(7)  | -7(7)   | -28(6)  |
| C(14T) | 127(8)  | 187(12) | 124(8)  | 31(8)   | 8(6)    | -58(8)  |
| C(15T) | 109(5)  | 106(5)  | 163(6)  | 14(5)   | 43(5)   | -11(4)  |
| C(16T) | 109(5)  | 106(5)  | 163(6)  | 14(5)   | 43(5)   | -11(4)  |
| O(4U)  | 127(12) | 101(14) | 117(14) | 5(11)   | 1(11)   | -33(11) |
| C(13U) | 118(12) | 83(12)  | 138(15) | 1(11)   | -15(13) | -37(11) |
| C(14U) | 109(14) | 140(20) | 119(18) | -42(15) | 25(14)  | -9(14)  |
| C(15U) | 154(18) | 148(18) | 161(19) | 45(15)  | 12(17)  | -23(13) |
| C(16U) | 117(13) | 150(20) | 124(18) | 0(16)   | -10(13) | -26(15) |
| K(2)   | 47(1)   | 67(1)   | 114(1)  | 4(1)    | 0       | 0       |
| O(5T)  | 120(11) | 86(7)   | 131(12) | -14(7)  | -6(8)   | 6(6)    |
| C(17T) | 95(9)   | 126(10) | 220(20) | -67(13) | 10(12)  | 17(7)   |
| C(18T) | 118(11) | 96(8)   | 162(16) | -46(9)  | -8(11)  | 41(8)   |
| C(19T) | 125(11) | 109(11) | 162(16) | -22(11) | -14(12) | -2(9)   |
| C(20T) | 151(13) | 94(9)   | 131(15) | -44(8)  | -36(10) | 19(9)   |
| O(5U)  | 83(6)   | 77(5)   | 173(14) | -45(6)  | -20(6)  | 12(4)   |
| C(17U) | 77(7)   | 114(8)  | 149(12) | -59(8)  | -13(7)  | 19(6)   |
| C(18U) | 122(11) | 117(11) | 240(20) | -89(12) | -13(13) | 34(9)   |
| C(19U) | 141(12) | 80(7)   | 160(14) | -41(8)  | -48(11) | 18(7)   |
| C(20U) | 112(9)  | 97(9)   | 157(16) | -52(9)  | -51(10) | 18(7)   |

|        |         |         |         |         |         |         |
|--------|---------|---------|---------|---------|---------|---------|
| O(6T)  | 95(9)   | 179(18) | 79(4)   | -11(6)  | 2(5)    | 12(10)  |
| C(21T) | 109(9)  | 211(12) | 84(7)   | 1(6)    | -7(5)   | 25(8)   |
| C(22T) | 110(9)  | 179(15) | 79(7)   | -5(8)   | 19(7)   | 1(9)    |
| C(23T) | 102(10) | 200(20) | 95(6)   | -11(12) | 0(8)    | -11(13) |
| C(24T) | 109(9)  | 211(12) | 84(7)   | 1(6)    | -7(5)   | 25(8)   |
| K(3)   | 40(1)   | 72(1)   | 76(1)   | 0       | 0       | -4(1)   |
| O(7T)  | 84(4)   | 58(5)   | 140(6)  | 24(5)   | 0       | 0       |
| C(25T) | 77(5)   | 97(7)   | 145(8)  | 11(6)   | -7(5)   | 6(4)    |
| C(26T) | 128(8)  | 88(6)   | 160(12) | 38(7)   | 2(8)    | 26(5)   |
| O(7U)  | 84(4)   | 58(5)   | 140(6)  | 24(5)   | 0       | 0       |
| C(25U) | 98(14)  | 88(16)  | 185(19) | 36(15)  | -5(14)  | 10(11)  |
| C(26U) | 108(15) | 97(17)  | 155(17) | 12(14)  | -18(14) | 21(12)  |
| O(8T)  | 138(13) | 105(9)  | 130(12) | -27(9)  | 0       | 0       |
| C(29T) | 167(16) | 133(16) | 251(19) | -60(15) | 35(13)  | 29(11)  |
| C(30T) | 221(19) | 106(14) | 250(20) | -70(16) | 63(16)  | 49(11)  |
| O(8U)  | 117(14) | 115(12) | 199(15) | -67(13) | 0       | 0       |
| C(29U) | 143(14) | 73(10)  | 290(20) | -35(12) | -9(15)  | 17(8)   |
| C(30U) | 270(30) | 112(16) | 230(20) | -47(16) | 95(18)  | -5(14)  |
| O(9T)  | 189(17) | 169(8)  | 102(5)  | -5(6)   | 36(13)  | 30(14)  |
| C(33T) | 233(15) | 171(19) | 94(12)  | 9(12)   | 50(13)  | -32(15) |
| C(34T) | 320(20) | 220(20) | 82(12)  | 62(12)  | -54(13) | -90(20) |
| C(35T) | 290(30) | 260(20) | 113(14) | 55(14)  | 1(17)   | -50(20) |
| C(36T) | 272(15) | 180(20) | 83(10)  | 24(13)  | 18(13)  | 17(17)  |

---



**Table S5.** Hydrogen coordinates ( $\times 10^4$ ) and isotropic displacement parameters ( $\text{\AA}^2 \times 10^3$ ) for Ama2.

|        | x    | y     | z    | U(eq) |
|--------|------|-------|------|-------|
| H(4)   | 1143 | -695  | 363  | 79    |
| H(5)   | 1509 | -1195 | 1042 | 79    |
| H(2A)  | 1879 | -93   | 2914 | 67    |
| H(3A)  | 1795 | -1926 | 2355 | 77    |
| H(4A)  | 1499 | -2035 | 5150 | 80    |
| H(5A)  | 1578 | -229  | 5696 | 73    |
| H(6A)  | 2062 | -80   | 5658 | 74    |
| H(7A)  | 2216 | -1261 | 3256 | 77    |
| H(8A)  | 1948 | -2647 | 4847 | 86    |
| H(9A)  | 1795 | -1434 | 7253 | 87    |
| H(10A) | 2248 | -1599 | 6181 | 85    |
| H(2B)  | 955  | 1091  | 3712 | 72    |
| H(3B)  | 749  | -599  | 4443 | 65    |
| H(4B)  | 693  | -958  | 1174 | 60    |
| H(5B)  | 902  | 726   | 454  | 74    |
| H(6B)  | 617  | 1777  | 1983 | 81    |
| H(7B)  | 511  | 824   | 4812 | 74    |
| H(8B)  | 322  | -598  | 2984 | 65    |
| H(9B)  | 439  | 335   | 166  | 70    |
| H(10B) | 202  | 998   | 2537 | 75    |
| H(1A)  | 731  | -449  | 6999 | 116   |
| H(1B)  | 745  | -542  | 8614 | 116   |
| H(2C)  | 673  | -1723 | 8368 | 181   |
| H(2D)  | 686  | -1646 | 6748 | 181   |
| H(3C)  | 1006 | -2142 | 8498 | 207   |
| H(3D)  | 988  | -2286 | 6895 | 207   |
| H(4C)  | 1268 | -1382 | 7959 | 134   |
| H(4D)  | 1185 | -1313 | 6418 | 134   |
| H(5C)  | 699  | 1171  | 8243 | 146   |
| H(5D)  | 610  | 1633  | 6954 | 146   |
| H(6C)  | 605  | 2679  | 8112 | 131   |

|        |      |      |       |     |
|--------|------|------|-------|-----|
| H(6D)  | 673  | 2201 | 9437  | 131 |
| H(7C)  | 1022 | 2472 | 9213  | 173 |
| H(7D)  | 929  | 3189 | 8376  | 173 |
| H(8C)  | 974  | 2611 | 6376  | 213 |
| H(8D)  | 1182 | 2284 | 7192  | 213 |
| H(9C)  | 1762 | 1609 | 7845  | 108 |
| H(9D)  | 1775 | 906  | 6818  | 108 |
| H(10C) | 1964 | 864  | 9142  | 183 |
| H(10D) | 1874 | 104  | 8431  | 183 |
| H(11A) | 1701 | 837  | 10674 | 183 |
| H(11B) | 1648 | -9   | 10161 | 183 |
| H(12A) | 1331 | 415  | 9319  | 179 |
| H(12B) | 1396 | 1273 | 9698  | 179 |
| H(9E)  | 1774 | 88   | 7839  | 161 |
| H(9F)  | 1629 | -342 | 8960  | 161 |
| H(10E) | 1868 | 1033 | 9291  | 146 |
| H(10F) | 1841 | 355  | 10375 | 146 |
| H(11C) | 1486 | 714  | 10915 | 122 |
| H(11D) | 1596 | 1532 | 10664 | 122 |
| H(12C) | 1259 | 1123 | 9239  | 133 |
| H(12D) | 1446 | 1645 | 8567  | 133 |
| H(13A) | 1544 | 2214 | 6087  | 168 |
| H(13B) | 1459 | 2687 | 4798  | 168 |
| H(14A) | 1819 | 2683 | 4255  | 175 |
| H(14B) | 1865 | 1911 | 5075  | 175 |
| H(15A) | 1745 | 2046 | 2377  | 151 |
| H(15B) | 1829 | 1293 | 3134  | 151 |
| H(16A) | 1402 | 1721 | 2606  | 151 |
| H(16B) | 1490 | 896  | 3019  | 151 |
| H(13C) | 1760 | 1079 | 5588  | 136 |
| H(13D) | 1751 | 1952 | 6060  | 136 |
| H(14C) | 1780 | 1414 | 3285  | 149 |
| H(14D) | 1931 | 2064 | 3970  | 149 |
| H(15C) | 1599 | 2568 | 2656  | 185 |
| H(15D) | 1621 | 2897 | 4179  | 185 |
| H(16C) | 1274 | 2304 | 4262  | 156 |

|        |      |       |       |     |
|--------|------|-------|-------|-----|
| H(16D) | 1356 | 1607  | 3341  | 156 |
| H(17A) | 346  | -1797 | 844   | 175 |
| H(17B) | 342  | -1996 | -744  | 175 |
| H(18A) | 208  | -3115 | -180  | 150 |
| H(18B) | 166  | -2847 | 1354  | 150 |
| H(19A) | -182 | -2587 | 929   | 159 |
| H(19B) | -150 | -3028 | -484  | 159 |
| H(20A) | -88  | -1941 | -1655 | 151 |
| H(20B) | -248 | -1607 | -505  | 151 |
| H(17C) | 250  | -1995 | 1504  | 136 |
| H(17D) | 377  | -1624 | 243   | 136 |
| H(18C) | 312  | -2626 | -1077 | 194 |
| H(18D) | 260  | -3067 | 312   | 194 |
| H(19C) | -93  | -3087 | -160  | 152 |
| H(19D) | -35  | -2749 | -1630 | 152 |
| H(20C) | -185 | -1664 | -1020 | 146 |
| H(20D) | -227 | -1984 | 485   | 146 |
| H(21A) | 298  | -473  | -1857 | 161 |
| H(21B) | 336  | 293   | -2706 | 161 |
| H(22A) | 151  | -1085 | -3642 | 147 |
| H(22B) | 308  | -509  | -4465 | 147 |
| H(23A) | 25   | 311   | -4913 | 160 |
| H(23B) | -112 | -469  | -4894 | 160 |
| H(24A) | -204 | 630   | -3222 | 161 |
| H(24B) | -252 | -239  | -2834 | 161 |
| H(25A) | 2194 | 829   | 3268  | 128 |
| H(25B) | 2253 | 592   | 1739  | 128 |
| H(26A) | 2322 | 1808  | 1379  | 150 |
| H(26B) | 2322 | 1992  | 2973  | 150 |
| H(25C) | 2274 | 1543  | 3477  | 148 |
| H(25D) | 2182 | 765   | 2840  | 148 |
| H(26C) | 2320 | 1025  | 787   | 144 |
| H(26D) | 2320 | 1888  | 1310  | 144 |
| H(29A) | 2258 | 836   | 7351  | 221 |
| H(29B) | 2189 | 1528  | 6383  | 221 |
| H(30A) | 2322 | 2377  | 7795  | 232 |

|        |      |       |       |     |
|--------|------|-------|-------|-----|
| H(30B) | 2322 | 1707  | 8898  | 232 |
| H(29C) | 2182 | 1289  | 7027  | 202 |
| H(29D) | 2274 | 1771  | 5763  | 202 |
| H(30C) | 2321 | 2684  | 7292  | 246 |
| H(30D) | 2321 | 2096  | 8535  | 246 |
| H(33A) | 2197 | -503  | 8220  | 199 |
| H(33B) | 2301 | -93   | 9528  | 199 |
| H(34A) | 2295 | -1697 | 8988  | 252 |
| H(34B) | 2227 | -1287 | 10386 | 252 |
| H(35A) | 2583 | -1062 | 10981 | 264 |
| H(35B) | 2623 | -1818 | 10104 | 264 |
| H(36A) | 2785 | -456  | 9482  | 215 |
| H(36B) | 2784 | -1173 | 8481  | 215 |

---

**Table S6.** Torsion angles [°] for Ama2.

---

|                         |           |
|-------------------------|-----------|
| C(5)-N(1)-C(2)-N(3)     | 1.1(4)    |
| C(1A)-N(1)-C(2)-N(3)    | 178.6(3)  |
| C(5)-N(1)-C(2)-K(1)     | -158.1(3) |
| C(1A)-N(1)-C(2)-K(1)    | 19.4(5)   |
| N(1)-C(2)-N(3)-C(4)     | -0.9(4)   |
| K(1)-C(2)-N(3)-C(4)     | 161.1(3)  |
| N(1)-C(2)-N(3)-C(1B)    | 178.2(3)  |
| K(1)-C(2)-N(3)-C(1B)    | -19.8(5)  |
| C(2)-N(3)-C(4)-C(5)     | 0.5(5)    |
| C(1B)-N(3)-C(4)-C(5)    | -178.6(4) |
| N(3)-C(4)-C(5)-N(1)     | 0.2(5)    |
| C(2)-N(1)-C(5)-C(4)     | -0.8(5)   |
| C(1A)-N(1)-C(5)-C(4)    | -178.4(3) |
| C(2)-N(1)-C(1A)-B(3A)   | 163.7(4)  |
| C(5)-N(1)-C(1A)-B(3A)   | -19.1(6)  |
| C(2)-N(1)-C(1A)-B(5A)   | -15.8(6)  |
| C(5)-N(1)-C(1A)-B(5A)   | 161.5(4)  |
| C(2)-N(1)-C(1A)-B(2A)   | -105.3(5) |
| C(5)-N(1)-C(1A)-B(2A)   | 71.9(5)   |
| C(2)-N(1)-C(1A)-B(4A)   | 72.3(5)   |
| C(5)-N(1)-C(1A)-B(4A)   | -110.5(5) |
| N(1)-C(1A)-B(2A)-B(6A)  | 147.0(3)  |
| B(3A)-C(1A)-B(2A)-B(6A) | -90.7(3)  |
| B(5A)-C(1A)-B(2A)-B(6A) | 27.4(3)   |
| B(4A)-C(1A)-B(2A)-B(6A) | -31.0(4)  |
| N(1)-C(1A)-B(2A)-B(7A)  | -148.1(4) |
| B(3A)-C(1A)-B(2A)-B(7A) | -25.8(4)  |
| B(5A)-C(1A)-B(2A)-B(7A) | 92.3(4)   |
| B(4A)-C(1A)-B(2A)-B(7A) | 33.9(5)   |
| N(1)-C(1A)-B(2A)-B(3A)  | -122.3(4) |
| B(5A)-C(1A)-B(2A)-B(3A) | 118.0(3)  |
| B(4A)-C(1A)-B(2A)-B(3A) | 59.7(4)   |
| N(1)-C(1A)-B(2A)-B(5A)  | 119.6(4)  |
| B(3A)-C(1A)-B(2A)-B(5A) | -118.0(3) |

|                         |           |
|-------------------------|-----------|
| B(4A)-C(1A)-B(2A)-B(5A) | -58.3(3)  |
| N(1)-C(1A)-B(3A)-B(8A)  | -148.2(4) |
| B(5A)-C(1A)-B(3A)-B(8A) | 31.4(4)   |
| B(2A)-C(1A)-B(3A)-B(8A) | 91.9(4)   |
| B(4A)-C(1A)-B(3A)-B(8A) | -27.1(3)  |
| N(1)-C(1A)-B(3A)-B(7A)  | 145.6(4)  |
| B(5A)-C(1A)-B(3A)-B(7A) | -34.8(5)  |
| B(2A)-C(1A)-B(3A)-B(7A) | 25.7(4)   |
| B(4A)-C(1A)-B(3A)-B(7A) | -93.3(4)  |
| N(1)-C(1A)-B(3A)-B(4A)  | -121.0(4) |
| B(5A)-C(1A)-B(3A)-B(4A) | 58.5(3)   |
| B(2A)-C(1A)-B(3A)-B(4A) | 119.0(3)  |
| N(1)-C(1A)-B(3A)-B(2A)  | 119.9(4)  |
| B(5A)-C(1A)-B(3A)-B(2A) | -60.5(3)  |
| B(4A)-C(1A)-B(3A)-B(2A) | -119.0(3) |
| B(6A)-B(2A)-B(3A)-C(1A) | 104.8(4)  |
| B(7A)-B(2A)-B(3A)-C(1A) | 151.5(4)  |
| B(5A)-B(2A)-B(3A)-C(1A) | 46.1(3)   |
| C(1A)-B(2A)-B(3A)-B(8A) | -105.4(4) |
| B(6A)-B(2A)-B(3A)-B(8A) | -0.7(4)   |
| B(7A)-B(2A)-B(3A)-B(8A) | 46.1(3)   |
| B(5A)-B(2A)-B(3A)-B(8A) | -59.3(3)  |
| C(1A)-B(2A)-B(3A)-B(7A) | -151.5(4) |
| B(6A)-B(2A)-B(3A)-B(7A) | -46.7(3)  |
| B(5A)-B(2A)-B(3A)-B(7A) | -105.4(3) |
| C(1A)-B(2A)-B(3A)-B(4A) | -46.3(3)  |
| B(6A)-B(2A)-B(3A)-B(4A) | 58.5(3)   |
| B(7A)-B(2A)-B(3A)-B(4A) | 105.2(4)  |
| B(5A)-B(2A)-B(3A)-B(4A) | -0.2(3)   |
| N(1)-C(1A)-B(4A)-B(9A)  | -146.2(4) |
| B(3A)-C(1A)-B(4A)-B(9A) | 91.6(4)   |
| B(5A)-C(1A)-B(4A)-B(9A) | -27.6(3)  |
| B(2A)-C(1A)-B(4A)-B(9A) | 31.7(5)   |
| N(1)-C(1A)-B(4A)-B(8A)  | 148.6(4)  |
| B(3A)-C(1A)-B(4A)-B(8A) | 26.5(3)   |
| B(5A)-C(1A)-B(4A)-B(8A) | -92.7(4)  |

|                         |           |
|-------------------------|-----------|
| B(2A)-C(1A)-B(4A)-B(8A) | -33.4(4)  |
| N(1)-C(1A)-B(4A)-B(5A)  | -118.6(4) |
| B(3A)-C(1A)-B(4A)-B(5A) | 119.2(3)  |
| B(2A)-C(1A)-B(4A)-B(5A) | 59.3(3)   |
| N(1)-C(1A)-B(4A)-B(3A)  | 122.2(4)  |
| B(5A)-C(1A)-B(4A)-B(3A) | -119.2(3) |
| B(2A)-C(1A)-B(4A)-B(3A) | -59.9(3)  |
| B(8A)-B(3A)-B(4A)-C(1A) | 150.2(3)  |
| B(7A)-B(3A)-B(4A)-C(1A) | 104.3(3)  |
| B(2A)-B(3A)-B(4A)-C(1A) | 46.0(2)   |
| C(1A)-B(3A)-B(4A)-B(9A) | -104.7(3) |
| B(8A)-B(3A)-B(4A)-B(9A) | 45.6(3)   |
| B(7A)-B(3A)-B(4A)-B(9A) | -0.4(4)   |
| B(2A)-B(3A)-B(4A)-B(9A) | -58.7(3)  |
| C(1A)-B(3A)-B(4A)-B(8A) | -150.2(3) |
| B(7A)-B(3A)-B(4A)-B(8A) | -45.9(3)  |
| B(2A)-B(3A)-B(4A)-B(8A) | -104.2(3) |
| C(1A)-B(3A)-B(4A)-B(5A) | -45.8(3)  |
| B(8A)-B(3A)-B(4A)-B(5A) | 104.4(3)  |
| B(7A)-B(3A)-B(4A)-B(5A) | 58.5(3)   |
| B(2A)-B(3A)-B(4A)-B(5A) | 0.2(3)    |
| N(1)-C(1A)-B(5A)-B(9A)  | 148.2(4)  |
| B(3A)-C(1A)-B(5A)-B(9A) | -31.4(4)  |
| B(2A)-C(1A)-B(5A)-B(9A) | -91.9(3)  |
| B(4A)-C(1A)-B(5A)-B(9A) | 27.8(3)   |
| N(1)-C(1A)-B(5A)-B(6A)  | -147.0(3) |
| B(3A)-C(1A)-B(5A)-B(6A) | 33.4(4)   |
| B(2A)-C(1A)-B(5A)-B(6A) | -27.0(3)  |
| B(4A)-C(1A)-B(5A)-B(6A) | 92.7(3)   |
| N(1)-C(1A)-B(5A)-B(4A)  | 120.3(4)  |
| B(3A)-C(1A)-B(5A)-B(4A) | -59.2(3)  |
| B(2A)-C(1A)-B(5A)-B(4A) | -119.7(3) |
| N(1)-C(1A)-B(5A)-B(2A)  | -120.0(4) |
| B(3A)-C(1A)-B(5A)-B(2A) | 60.5(3)   |
| B(4A)-C(1A)-B(5A)-B(2A) | 119.7(3)  |
| B(9A)-B(4A)-B(5A)-C(1A) | 149.5(4)  |

|                          |           |
|--------------------------|-----------|
| B(8A)-B(4A)-B(5A)-C(1A)  | 103.1(4)  |
| B(3A)-B(4A)-B(5A)-C(1A)  | 45.2(3)   |
| C(1A)-B(4A)-B(5A)-B(9A)  | -149.5(4) |
| B(8A)-B(4A)-B(5A)-B(9A)  | -46.3(4)  |
| B(3A)-B(4A)-B(5A)-B(9A)  | -104.2(3) |
| C(1A)-B(4A)-B(5A)-B(6A)  | -103.6(4) |
| B(9A)-B(4A)-B(5A)-B(6A)  | 45.8(3)   |
| B(8A)-B(4A)-B(5A)-B(6A)  | -0.5(5)   |
| B(3A)-B(4A)-B(5A)-B(6A)  | -58.4(4)  |
| C(1A)-B(4A)-B(5A)-B(2A)  | -45.4(3)  |
| B(9A)-B(4A)-B(5A)-B(2A)  | 104.0(3)  |
| B(8A)-B(4A)-B(5A)-B(2A)  | 57.7(4)   |
| B(3A)-B(4A)-B(5A)-B(2A)  | -0.2(3)   |
| B(6A)-B(2A)-B(5A)-C(1A)  | -149.6(3) |
| B(7A)-B(2A)-B(5A)-C(1A)  | -104.3(3) |
| B(3A)-B(2A)-B(5A)-C(1A)  | -46.0(2)  |
| C(1A)-B(2A)-B(5A)-B(9A)  | 105.4(3)  |
| B(6A)-B(2A)-B(5A)-B(9A)  | -44.1(3)  |
| B(7A)-B(2A)-B(5A)-B(9A)  | 1.1(4)    |
| B(3A)-B(2A)-B(5A)-B(9A)  | 59.4(3)   |
| C(1A)-B(2A)-B(5A)-B(6A)  | 149.6(3)  |
| B(7A)-B(2A)-B(5A)-B(6A)  | 45.3(3)   |
| B(3A)-B(2A)-B(5A)-B(6A)  | 103.6(3)  |
| C(1A)-B(2A)-B(5A)-B(4A)  | 46.2(3)   |
| B(6A)-B(2A)-B(5A)-B(4A)  | -103.4(3) |
| B(7A)-B(2A)-B(5A)-B(4A)  | -58.2(3)  |
| B(3A)-B(2A)-B(5A)-B(4A)  | 0.2(3)    |
| C(1A)-B(2A)-B(6A)-B(10A) | 78.1(4)   |
| B(7A)-B(2A)-B(6A)-B(10A) | -23.8(3)  |
| B(3A)-B(2A)-B(6A)-B(10A) | 22.0(4)   |
| B(5A)-B(2A)-B(6A)-B(10A) | 103.9(4)  |
| C(1A)-B(2A)-B(6A)-B(5A)  | -25.8(3)  |
| B(7A)-B(2A)-B(6A)-B(5A)  | -127.7(3) |
| B(3A)-B(2A)-B(6A)-B(5A)  | -81.9(3)  |
| C(1A)-B(2A)-B(6A)-B(7A)  | 101.9(3)  |
| B(3A)-B(2A)-B(6A)-B(7A)  | 45.7(3)   |



|                          |           |
|--------------------------|-----------|
| B(5A)-B(2A)-B(6A)-B(7A)  | 127.7(3)  |
| C(1A)-B(2A)-B(6A)-B(9A)  | 17.6(4)   |
| B(7A)-B(2A)-B(6A)-B(9A)  | -84.2(3)  |
| B(3A)-B(2A)-B(6A)-B(9A)  | -38.5(4)  |
| B(5A)-B(2A)-B(6A)-B(9A)  | 43.4(3)   |
| C(1A)-B(5A)-B(6A)-B(10A) | -78.6(5)  |
| B(9A)-B(5A)-B(6A)-B(10A) | 24.6(4)   |
| B(4A)-B(5A)-B(6A)-B(10A) | -20.5(5)  |
| B(2A)-B(5A)-B(6A)-B(10A) | -104.4(4) |
| C(1A)-B(5A)-B(6A)-B(2A)  | 25.9(3)   |
| B(9A)-B(5A)-B(6A)-B(2A)  | 129.0(3)  |
| B(4A)-B(5A)-B(6A)-B(2A)  | 83.9(3)   |
| C(1A)-B(5A)-B(6A)-B(7A)  | -18.6(4)  |
| B(9A)-B(5A)-B(6A)-B(7A)  | 84.5(4)   |
| B(4A)-B(5A)-B(6A)-B(7A)  | 39.4(4)   |
| B(2A)-B(5A)-B(6A)-B(7A)  | -44.5(3)  |
| C(1A)-B(5A)-B(6A)-B(9A)  | -103.2(4) |
| B(4A)-B(5A)-B(6A)-B(9A)  | -45.1(4)  |
| B(2A)-B(5A)-B(6A)-B(9A)  | -129.0(3) |
| C(1A)-B(2A)-B(7A)-B(10A) | -77.5(4)  |
| B(6A)-B(2A)-B(7A)-B(10A) | 23.6(3)   |
| B(3A)-B(2A)-B(7A)-B(10A) | -101.8(4) |
| B(5A)-B(2A)-B(7A)-B(10A) | -20.8(4)  |
| C(1A)-B(2A)-B(7A)-B(3A)  | 24.3(3)   |
| B(6A)-B(2A)-B(7A)-B(3A)  | 125.3(4)  |
| B(5A)-B(2A)-B(7A)-B(3A)  | 80.9(3)   |
| C(1A)-B(2A)-B(7A)-B(6A)  | -101.1(4) |
| B(3A)-B(2A)-B(7A)-B(6A)  | -125.3(4) |
| B(5A)-B(2A)-B(7A)-B(6A)  | -44.4(3)  |
| C(1A)-B(2A)-B(7A)-B(8A)  | -19.7(5)  |
| B(6A)-B(2A)-B(7A)-B(8A)  | 81.4(4)   |
| B(3A)-B(2A)-B(7A)-B(8A)  | -44.0(3)  |
| B(5A)-B(2A)-B(7A)-B(8A)  | 37.0(4)   |
| C(1A)-B(3A)-B(7A)-B(10A) | 80.0(4)   |
| B(8A)-B(3A)-B(7A)-B(10A) | -22.7(3)  |
| B(4A)-B(3A)-B(7A)-B(10A) | 22.0(4)   |

|                          |           |
|--------------------------|-----------|
| B(2A)-B(3A)-B(7A)-B(10A) | 104.5(4)  |
| C(1A)-B(3A)-B(7A)-B(2A)  | -24.6(4)  |
| B(8A)-B(3A)-B(7A)-B(2A)  | -127.2(4) |
| B(4A)-B(3A)-B(7A)-B(2A)  | -82.5(3)  |
| C(1A)-B(3A)-B(7A)-B(6A)  | 21.0(5)   |
| B(8A)-B(3A)-B(7A)-B(6A)  | -81.6(3)  |
| B(4A)-B(3A)-B(7A)-B(6A)  | -36.9(4)  |
| B(2A)-B(3A)-B(7A)-B(6A)  | 45.6(3)   |
| C(1A)-B(3A)-B(7A)-B(8A)  | 102.7(4)  |
| B(4A)-B(3A)-B(7A)-B(8A)  | 44.7(3)   |
| B(2A)-B(3A)-B(7A)-B(8A)  | 127.2(4)  |
| B(2A)-B(6A)-B(7A)-B(10A) | -153.8(4) |
| B(5A)-B(6A)-B(7A)-B(10A) | -108.1(4) |
| B(9A)-B(6A)-B(7A)-B(10A) | -49.2(3)  |
| B(10A)-B(6A)-B(7A)-B(2A) | 153.8(4)  |
| B(5A)-B(6A)-B(7A)-B(2A)  | 45.7(3)   |
| B(9A)-B(6A)-B(7A)-B(2A)  | 104.6(3)  |
| B(10A)-B(6A)-B(7A)-B(3A) | 106.9(4)  |
| B(2A)-B(6A)-B(7A)-B(3A)  | -46.9(3)  |
| B(5A)-B(6A)-B(7A)-B(3A)  | -1.2(4)   |
| B(9A)-B(6A)-B(7A)-B(3A)  | 57.8(4)   |
| B(10A)-B(6A)-B(7A)-B(8A) | 49.3(3)   |
| B(2A)-B(6A)-B(7A)-B(8A)  | -104.5(3) |
| B(5A)-B(6A)-B(7A)-B(8A)  | -58.9(4)  |
| B(9A)-B(6A)-B(7A)-B(8A)  | 0.1(3)    |
| C(1A)-B(3A)-B(8A)-B(10A) | -78.3(5)  |
| B(7A)-B(3A)-B(8A)-B(10A) | 23.4(4)   |
| B(4A)-B(3A)-B(8A)-B(10A) | -104.2(4) |
| B(2A)-B(3A)-B(8A)-B(10A) | -21.0(5)  |
| C(1A)-B(3A)-B(8A)-B(4A)  | 25.9(3)   |
| B(7A)-B(3A)-B(8A)-B(4A)  | 127.6(3)  |
| B(2A)-B(3A)-B(8A)-B(4A)  | 83.2(3)   |
| C(1A)-B(3A)-B(8A)-B(9A)  | -18.4(4)  |
| B(7A)-B(3A)-B(8A)-B(9A)  | 83.4(3)   |
| B(4A)-B(3A)-B(8A)-B(9A)  | -44.2(3)  |
| B(2A)-B(3A)-B(8A)-B(9A)  | 39.0(4)   |

|                          |           |
|--------------------------|-----------|
| C(1A)-B(3A)-B(8A)-B(7A)  | -101.8(3) |
| B(4A)-B(3A)-B(8A)-B(7A)  | -127.6(3) |
| B(2A)-B(3A)-B(8A)-B(7A)  | -44.4(3)  |
| C(1A)-B(4A)-B(8A)-B(10A) | 78.8(5)   |
| B(9A)-B(4A)-B(8A)-B(10A) | -23.5(4)  |
| B(5A)-B(4A)-B(8A)-B(10A) | 21.8(5)   |
| B(3A)-B(4A)-B(8A)-B(10A) | 103.9(4)  |
| C(1A)-B(4A)-B(8A)-B(3A)  | -25.1(3)  |
| B(9A)-B(4A)-B(8A)-B(3A)  | -127.4(3) |
| B(5A)-B(4A)-B(8A)-B(3A)  | -82.1(3)  |
| C(1A)-B(4A)-B(8A)-B(9A)  | 102.3(4)  |
| B(5A)-B(4A)-B(8A)-B(9A)  | 45.3(3)   |
| B(3A)-B(4A)-B(8A)-B(9A)  | 127.4(3)  |
| C(1A)-B(4A)-B(8A)-B(7A)  | 19.2(5)   |
| B(9A)-B(4A)-B(8A)-B(7A)  | -83.1(4)  |
| B(5A)-B(4A)-B(8A)-B(7A)  | -37.8(5)  |
| B(3A)-B(4A)-B(8A)-B(7A)  | 44.3(3)   |
| B(2A)-B(7A)-B(8A)-B(10A) | -108.5(4) |
| B(3A)-B(7A)-B(8A)-B(10A) | -154.0(4) |
| B(6A)-B(7A)-B(8A)-B(10A) | -50.3(3)  |
| B(10A)-B(7A)-B(8A)-B(3A) | 154.0(4)  |
| B(2A)-B(7A)-B(8A)-B(3A)  | 45.5(3)   |
| B(6A)-B(7A)-B(8A)-B(3A)  | 103.8(3)  |
| B(10A)-B(7A)-B(8A)-B(4A) | 108.6(4)  |
| B(2A)-B(7A)-B(8A)-B(4A)  | 0.1(4)    |
| B(3A)-B(7A)-B(8A)-B(4A)  | -45.4(3)  |
| B(6A)-B(7A)-B(8A)-B(4A)  | 58.3(4)   |
| B(10A)-B(7A)-B(8A)-B(9A) | 50.2(3)   |
| B(2A)-B(7A)-B(8A)-B(9A)  | -58.3(4)  |
| B(3A)-B(7A)-B(8A)-B(9A)  | -103.9(3) |
| B(6A)-B(7A)-B(8A)-B(9A)  | -0.1(3)   |
| C(1A)-B(5A)-B(9A)-B(10A) | 75.8(5)   |
| B(6A)-B(5A)-B(9A)-B(10A) | -24.2(4)  |
| B(4A)-B(5A)-B(9A)-B(10A) | 102.4(5)  |
| B(2A)-B(5A)-B(9A)-B(10A) | 18.6(5)   |
| C(1A)-B(5A)-B(9A)-B(4A)  | -26.7(3)  |

|                          |           |
|--------------------------|-----------|
| B(6A)-B(5A)-B(9A)-B(4A)  | -126.7(4) |
| B(2A)-B(5A)-B(9A)-B(4A)  | -83.8(3)  |
| C(1A)-B(5A)-B(9A)-B(6A)  | 100.0(4)  |
| B(4A)-B(5A)-B(9A)-B(6A)  | 126.7(4)  |
| B(2A)-B(5A)-B(9A)-B(6A)  | 42.9(3)   |
| C(1A)-B(5A)-B(9A)-B(8A)  | 18.3(4)   |
| B(6A)-B(5A)-B(9A)-B(8A)  | -81.7(3)  |
| B(4A)-B(5A)-B(9A)-B(8A)  | 44.9(3)   |
| B(2A)-B(5A)-B(9A)-B(8A)  | -38.9(4)  |
| C(1A)-B(4A)-B(9A)-B(10A) | -77.5(5)  |
| B(8A)-B(4A)-B(9A)-B(10A) | 22.7(3)   |
| B(5A)-B(4A)-B(9A)-B(10A) | -103.7(4) |
| B(3A)-B(4A)-B(9A)-B(10A) | -21.3(4)  |
| C(1A)-B(4A)-B(9A)-B(5A)  | 26.2(3)   |
| B(8A)-B(4A)-B(9A)-B(5A)  | 126.4(4)  |
| B(3A)-B(4A)-B(9A)-B(5A)  | 82.4(3)   |
| C(1A)-B(4A)-B(9A)-B(6A)  | -18.8(4)  |
| B(8A)-B(4A)-B(9A)-B(6A)  | 81.5(3)   |
| B(5A)-B(4A)-B(9A)-B(6A)  | -44.9(3)  |
| B(3A)-B(4A)-B(9A)-B(6A)  | 37.5(4)   |
| C(1A)-B(4A)-B(9A)-B(8A)  | -100.2(4) |
| B(5A)-B(4A)-B(9A)-B(8A)  | -126.4(4) |
| B(3A)-B(4A)-B(9A)-B(8A)  | -44.0(3)  |
| B(2A)-B(6A)-B(9A)-B(10A) | 108.2(4)  |
| B(5A)-B(6A)-B(9A)-B(10A) | 152.9(4)  |
| B(7A)-B(6A)-B(9A)-B(10A) | 49.0(3)   |
| B(10A)-B(6A)-B(9A)-B(5A) | -152.9(4) |
| B(2A)-B(6A)-B(9A)-B(5A)  | -44.7(3)  |
| B(7A)-B(6A)-B(9A)-B(5A)  | -103.9(3) |
| B(10A)-B(6A)-B(9A)-B(4A) | -107.5(4) |
| B(2A)-B(6A)-B(9A)-B(4A)  | 0.7(4)    |
| B(5A)-B(6A)-B(9A)-B(4A)  | 45.4(3)   |
| B(7A)-B(6A)-B(9A)-B(4A)  | -58.5(4)  |
| B(10A)-B(6A)-B(9A)-B(8A) | -49.1(3)  |
| B(2A)-B(6A)-B(9A)-B(8A)  | 59.1(3)   |
| B(5A)-B(6A)-B(9A)-B(8A)  | 103.8(3)  |

|                          |           |
|--------------------------|-----------|
| B(7A)-B(6A)-B(9A)-B(8A)  | -0.1(3)   |
| B(3A)-B(8A)-B(9A)-B(10A) | -108.6(4) |
| B(4A)-B(8A)-B(9A)-B(10A) | -154.1(4) |
| B(7A)-B(8A)-B(9A)-B(10A) | -49.8(3)  |
| B(10A)-B(8A)-B(9A)-B(5A) | 108.6(4)  |
| B(3A)-B(8A)-B(9A)-B(5A)  | 0.0(4)    |
| B(4A)-B(8A)-B(9A)-B(5A)  | -45.5(3)  |
| B(7A)-B(8A)-B(9A)-B(5A)  | 58.8(3)   |
| B(10A)-B(8A)-B(9A)-B(4A) | 154.1(4)  |
| B(3A)-B(8A)-B(9A)-B(4A)  | 45.6(3)   |
| B(7A)-B(8A)-B(9A)-B(4A)  | 104.3(3)  |
| B(10A)-B(8A)-B(9A)-B(6A) | 49.9(3)   |
| B(3A)-B(8A)-B(9A)-B(6A)  | -58.7(3)  |
| B(4A)-B(8A)-B(9A)-B(6A)  | -104.2(3) |
| B(7A)-B(8A)-B(9A)-B(6A)  | 0.1(3)    |
| B(3A)-B(8A)-B(10A)-B(6A) | 33.5(5)   |
| B(4A)-B(8A)-B(10A)-B(6A) | -33.5(5)  |
| B(9A)-B(8A)-B(10A)-B(6A) | -57.3(4)  |
| B(7A)-B(8A)-B(10A)-B(6A) | 57.5(3)   |
| B(3A)-B(8A)-B(10A)-B(7A) | -24.0(4)  |
| B(4A)-B(8A)-B(10A)-B(7A) | -91.0(4)  |
| B(9A)-B(8A)-B(10A)-B(7A) | -114.8(3) |
| B(3A)-B(8A)-B(10A)-B(9A) | 90.8(4)   |
| B(4A)-B(8A)-B(10A)-B(9A) | 23.9(4)   |
| B(7A)-B(8A)-B(10A)-B(9A) | 114.8(3)  |
| B(2A)-B(6A)-B(10A)-B(8A) | -34.2(5)  |
| B(5A)-B(6A)-B(10A)-B(8A) | 33.1(5)   |
| B(7A)-B(6A)-B(10A)-B(8A) | -58.6(4)  |
| B(9A)-B(6A)-B(10A)-B(8A) | 58.1(4)   |
| B(2A)-B(6A)-B(10A)-B(7A) | 24.3(3)   |
| B(5A)-B(6A)-B(10A)-B(7A) | 91.6(4)   |
| B(9A)-B(6A)-B(10A)-B(7A) | 116.6(4)  |
| B(2A)-B(6A)-B(10A)-B(9A) | -92.3(4)  |
| B(5A)-B(6A)-B(10A)-B(9A) | -25.0(4)  |
| B(7A)-B(6A)-B(10A)-B(9A) | -116.6(4) |
| B(2A)-B(7A)-B(10A)-B(8A) | 89.7(4)   |

|                          |           |
|--------------------------|-----------|
| B(3A)-B(7A)-B(10A)-B(8A) | 23.5(3)   |
| B(6A)-B(7A)-B(10A)-B(8A) | 113.8(3)  |
| B(2A)-B(7A)-B(10A)-B(6A) | -24.1(3)  |
| B(3A)-B(7A)-B(10A)-B(6A) | -90.4(3)  |
| B(8A)-B(7A)-B(10A)-B(6A) | -113.8(3) |
| B(2A)-B(7A)-B(10A)-B(9A) | 31.7(4)   |
| B(3A)-B(7A)-B(10A)-B(9A) | -34.5(4)  |
| B(6A)-B(7A)-B(10A)-B(9A) | 55.9(3)   |
| B(8A)-B(7A)-B(10A)-B(9A) | -58.0(3)  |
| B(5A)-B(9A)-B(10A)-B(8A) | -89.1(4)  |
| B(4A)-B(9A)-B(10A)-B(8A) | -23.7(4)  |
| B(6A)-B(9A)-B(10A)-B(8A) | -114.1(4) |
| B(5A)-B(9A)-B(10A)-B(6A) | 25.0(4)   |
| B(4A)-B(9A)-B(10A)-B(6A) | 90.4(4)   |
| B(8A)-B(9A)-B(10A)-B(6A) | 114.1(4)  |
| B(5A)-B(9A)-B(10A)-B(7A) | -30.8(5)  |
| B(4A)-B(9A)-B(10A)-B(7A) | 34.6(4)   |
| B(6A)-B(9A)-B(10A)-B(7A) | -55.8(3)  |
| B(8A)-B(9A)-B(10A)-B(7A) | 58.2(3)   |
| C(2)-N(3)-C(1B)-B(3B)    | -45.0(5)  |
| C(4)-N(3)-C(1B)-B(3B)    | 134.0(4)  |
| C(2)-N(3)-C(1B)-B(4B)    | -134.5(4) |
| C(4)-N(3)-C(1B)-B(4B)    | 44.5(6)   |
| C(2)-N(3)-C(1B)-B(2B)    | 46.2(6)   |
| C(4)-N(3)-C(1B)-B(2B)    | -134.7(4) |
| C(2)-N(3)-C(1B)-B(5B)    | 136.5(4)  |
| C(4)-N(3)-C(1B)-B(5B)    | -44.5(5)  |
| N(3)-C(1B)-B(2B)-B(6B)   | 147.6(4)  |
| B(3B)-C(1B)-B(2B)-B(6B)  | -91.8(4)  |
| B(4B)-C(1B)-B(2B)-B(6B)  | -31.7(4)  |
| B(5B)-C(1B)-B(2B)-B(6B)  | 27.8(3)   |
| N(3)-C(1B)-B(2B)-B(7B)   | -147.2(4) |
| B(3B)-C(1B)-B(2B)-B(7B)  | -26.6(3)  |
| B(4B)-C(1B)-B(2B)-B(7B)  | 33.4(4)   |
| B(5B)-C(1B)-B(2B)-B(7B)  | 92.9(3)   |
| N(3)-C(1B)-B(2B)-B(5B)   | 119.9(4)  |

|                         |           |
|-------------------------|-----------|
| B(3B)-C(1B)-B(2B)-B(5B) | -119.5(3) |
| B(4B)-C(1B)-B(2B)-B(5B) | -59.5(3)  |
| N(3)-C(1B)-B(2B)-B(3B)  | -120.6(4) |
| B(4B)-C(1B)-B(2B)-B(3B) | 60.1(3)   |
| B(5B)-C(1B)-B(2B)-B(3B) | 119.5(3)  |
| N(3)-C(1B)-B(3B)-B(7B)  | 149.0(3)  |
| B(4B)-C(1B)-B(3B)-B(7B) | -91.9(3)  |
| B(2B)-C(1B)-B(3B)-B(7B) | 27.0(3)   |
| B(5B)-C(1B)-B(3B)-B(7B) | -32.3(4)  |
| N(3)-C(1B)-B(3B)-B(8B)  | -146.3(3) |
| B(4B)-C(1B)-B(3B)-B(8B) | -27.3(3)  |
| B(2B)-C(1B)-B(3B)-B(8B) | 91.6(3)   |
| B(5B)-C(1B)-B(3B)-B(8B) | 32.4(4)   |
| N(3)-C(1B)-B(3B)-B(4B)  | -119.1(4) |
| B(2B)-C(1B)-B(3B)-B(4B) | 118.9(3)  |
| B(5B)-C(1B)-B(3B)-B(4B) | 59.6(3)   |
| N(3)-C(1B)-B(3B)-B(2B)  | 122.0(4)  |
| B(4B)-C(1B)-B(3B)-B(2B) | -118.9(3) |
| B(5B)-C(1B)-B(3B)-B(2B) | -59.3(3)  |
| B(6B)-B(2B)-B(3B)-C(1B) | 104.5(4)  |
| B(7B)-B(2B)-B(3B)-C(1B) | 150.1(3)  |
| B(5B)-B(2B)-B(3B)-C(1B) | 45.6(3)   |
| C(1B)-B(2B)-B(3B)-B(7B) | -150.1(3) |
| B(6B)-B(2B)-B(3B)-B(7B) | -45.6(3)  |
| B(5B)-B(2B)-B(3B)-B(7B) | -104.5(3) |
| C(1B)-B(2B)-B(3B)-B(8B) | -104.5(3) |
| B(6B)-B(2B)-B(3B)-B(8B) | 0.1(4)    |
| B(7B)-B(2B)-B(3B)-B(8B) | 45.6(3)   |
| B(5B)-B(2B)-B(3B)-B(8B) | -58.8(3)  |
| C(1B)-B(2B)-B(3B)-B(4B) | -45.9(2)  |
| B(6B)-B(2B)-B(3B)-B(4B) | 58.6(3)   |
| B(7B)-B(2B)-B(3B)-B(4B) | 104.2(3)  |
| B(5B)-B(2B)-B(3B)-B(4B) | -0.3(3)   |
| N(3)-C(1B)-B(4B)-B(9B)  | -147.1(3) |
| B(3B)-C(1B)-B(4B)-B(9B) | 92.4(3)   |
| B(2B)-C(1B)-B(4B)-B(9B) | 32.2(4)   |

|                         |           |
|-------------------------|-----------|
| B(5B)-C(1B)-B(4B)-B(9B) | -27.0(3)  |
| N(3)-C(1B)-B(4B)-B(8B)  | 147.9(4)  |
| B(3B)-C(1B)-B(4B)-B(8B) | 27.4(3)   |
| B(2B)-C(1B)-B(4B)-B(8B) | -32.8(4)  |
| B(5B)-C(1B)-B(4B)-B(8B) | -92.0(3)  |
| N(3)-C(1B)-B(4B)-B(3B)  | 120.5(4)  |
| B(2B)-C(1B)-B(4B)-B(3B) | -60.1(3)  |
| B(5B)-C(1B)-B(4B)-B(3B) | -119.4(3) |
| N(3)-C(1B)-B(4B)-B(5B)  | -120.1(4) |
| B(3B)-C(1B)-B(4B)-B(5B) | 119.4(3)  |
| B(2B)-C(1B)-B(4B)-B(5B) | 59.3(3)   |
| B(7B)-B(3B)-B(4B)-C(1B) | 104.6(3)  |
| B(8B)-B(3B)-B(4B)-C(1B) | 149.7(3)  |
| B(2B)-B(3B)-B(4B)-C(1B) | 45.9(2)   |
| C(1B)-B(3B)-B(4B)-B(9B) | -103.6(3) |
| B(7B)-B(3B)-B(4B)-B(9B) | 1.0(4)    |
| B(8B)-B(3B)-B(4B)-B(9B) | 46.0(3)   |
| B(2B)-B(3B)-B(4B)-B(9B) | -57.7(3)  |
| C(1B)-B(3B)-B(4B)-B(8B) | -149.7(3) |
| B(7B)-B(3B)-B(4B)-B(8B) | -45.1(3)  |
| B(2B)-B(3B)-B(4B)-B(8B) | -103.8(3) |
| C(1B)-B(3B)-B(4B)-B(5B) | -45.6(2)  |
| B(7B)-B(3B)-B(4B)-B(5B) | 58.9(3)   |
| B(8B)-B(3B)-B(4B)-B(5B) | 104.0(3)  |
| B(2B)-B(3B)-B(4B)-B(5B) | 0.3(3)    |
| N(3)-C(1B)-B(5B)-B(9B)  | 146.2(3)  |
| B(3B)-C(1B)-B(5B)-B(9B) | -32.6(4)  |
| B(4B)-C(1B)-B(5B)-B(9B) | 27.2(3)   |
| B(2B)-C(1B)-B(5B)-B(9B) | -92.2(4)  |
| N(3)-C(1B)-B(5B)-B(6B)  | -149.1(3) |
| B(3B)-C(1B)-B(5B)-B(6B) | 32.2(4)   |
| B(4B)-C(1B)-B(5B)-B(6B) | 91.9(3)   |
| B(2B)-C(1B)-B(5B)-B(6B) | -27.5(3)  |
| N(3)-C(1B)-B(5B)-B(2B)  | -121.6(4) |
| B(3B)-C(1B)-B(5B)-B(2B) | 59.6(3)   |
| B(4B)-C(1B)-B(5B)-B(2B) | 119.4(3)  |



|                          |           |
|--------------------------|-----------|
| N(3)-C(1B)-B(5B)-B(4B)   | 118.9(4)  |
| B(3B)-C(1B)-B(5B)-B(4B)  | -59.8(3)  |
| B(2B)-C(1B)-B(5B)-B(4B)  | -119.4(3) |
| B(6B)-B(2B)-B(5B)-C(1B)  | -149.3(3) |
| B(7B)-B(2B)-B(5B)-C(1B)  | -103.3(3) |
| B(3B)-B(2B)-B(5B)-C(1B)  | -45.2(2)  |
| C(1B)-B(2B)-B(5B)-B(9B)  | 103.9(3)  |
| B(6B)-B(2B)-B(5B)-B(9B)  | -45.3(3)  |
| B(7B)-B(2B)-B(5B)-B(9B)  | 0.7(4)    |
| B(3B)-B(2B)-B(5B)-B(9B)  | 58.7(3)   |
| C(1B)-B(2B)-B(5B)-B(6B)  | 149.3(3)  |
| B(7B)-B(2B)-B(5B)-B(6B)  | 46.0(3)   |
| B(3B)-B(2B)-B(5B)-B(6B)  | 104.0(3)  |
| C(1B)-B(2B)-B(5B)-B(4B)  | 45.5(2)   |
| B(6B)-B(2B)-B(5B)-B(4B)  | -103.8(3) |
| B(7B)-B(2B)-B(5B)-B(4B)  | -57.8(3)  |
| B(3B)-B(2B)-B(5B)-B(4B)  | 0.3(3)    |
| B(9B)-B(4B)-B(5B)-C(1B)  | 149.6(4)  |
| B(8B)-B(4B)-B(5B)-C(1B)  | 104.2(3)  |
| B(3B)-B(4B)-B(5B)-C(1B)  | 45.4(3)   |
| C(1B)-B(4B)-B(5B)-B(9B)  | -149.6(4) |
| B(8B)-B(4B)-B(5B)-B(9B)  | -45.4(3)  |
| B(3B)-B(4B)-B(5B)-B(9B)  | -104.3(3) |
| C(1B)-B(4B)-B(5B)-B(6B)  | -104.0(4) |
| B(9B)-B(4B)-B(5B)-B(6B)  | 45.6(3)   |
| B(8B)-B(4B)-B(5B)-B(6B)  | 0.3(4)    |
| B(3B)-B(4B)-B(5B)-B(6B)  | -58.6(3)  |
| C(1B)-B(4B)-B(5B)-B(2B)  | -45.6(2)  |
| B(9B)-B(4B)-B(5B)-B(2B)  | 104.0(3)  |
| B(8B)-B(4B)-B(5B)-B(2B)  | 58.6(3)   |
| B(3B)-B(4B)-B(5B)-B(2B)  | -0.3(3)   |
| C(1B)-B(2B)-B(6B)-B(10B) | 78.1(5)   |
| B(7B)-B(2B)-B(6B)-B(10B) | -22.5(3)  |
| B(5B)-B(2B)-B(6B)-B(10B) | 104.4(4)  |
| B(3B)-B(2B)-B(6B)-B(10B) | 21.5(5)   |
| C(1B)-B(2B)-B(6B)-B(5B)  | -26.3(3)  |

|                          |           |
|--------------------------|-----------|
| B(7B)-B(2B)-B(6B)-B(5B)  | -126.9(3) |
| B(3B)-B(2B)-B(6B)-B(5B)  | -82.9(3)  |
| C(1B)-B(2B)-B(6B)-B(9B)  | 17.7(5)   |
| B(7B)-B(2B)-B(6B)-B(9B)  | -82.9(3)  |
| B(5B)-B(2B)-B(6B)-B(9B)  | 44.0(3)   |
| B(3B)-B(2B)-B(6B)-B(9B)  | -38.9(4)  |
| C(1B)-B(2B)-B(6B)-B(7B)  | 100.6(4)  |
| B(5B)-B(2B)-B(6B)-B(7B)  | 126.9(3)  |
| B(3B)-B(2B)-B(6B)-B(7B)  | 44.1(3)   |
| C(1B)-B(5B)-B(6B)-B(10B) | -77.6(4)  |
| B(9B)-B(5B)-B(6B)-B(10B) | 23.6(4)   |
| B(2B)-B(5B)-B(6B)-B(10B) | -103.8(4) |
| B(4B)-B(5B)-B(6B)-B(10B) | -20.9(5)  |
| C(1B)-B(5B)-B(6B)-B(2B)  | 26.2(3)   |
| B(9B)-B(5B)-B(6B)-B(2B)  | 127.4(3)  |
| B(4B)-B(5B)-B(6B)-B(2B)  | 82.9(3)   |
| C(1B)-B(5B)-B(6B)-B(9B)  | -101.2(3) |
| B(2B)-B(5B)-B(6B)-B(9B)  | -127.4(3) |
| B(4B)-B(5B)-B(6B)-B(9B)  | -44.5(3)  |
| C(1B)-B(5B)-B(6B)-B(7B)  | -18.6(4)  |
| B(9B)-B(5B)-B(6B)-B(7B)  | 82.7(3)   |
| B(2B)-B(5B)-B(6B)-B(7B)  | -44.8(3)  |
| B(4B)-B(5B)-B(6B)-B(7B)  | 38.1(4)   |
| C(1B)-B(3B)-B(7B)-B(10B) | 77.5(4)   |
| B(8B)-B(3B)-B(7B)-B(10B) | -23.6(3)  |
| B(4B)-B(3B)-B(7B)-B(10B) | 20.6(5)   |
| B(2B)-B(3B)-B(7B)-B(10B) | 103.1(4)  |
| C(1B)-B(3B)-B(7B)-B(2B)  | -25.6(3)  |
| B(8B)-B(3B)-B(7B)-B(2B)  | -126.8(3) |
| B(4B)-B(3B)-B(7B)-B(2B)  | -82.6(3)  |
| C(1B)-B(3B)-B(7B)-B(8B)  | 101.2(3)  |
| B(4B)-B(3B)-B(7B)-B(8B)  | 44.2(3)   |
| B(2B)-B(3B)-B(7B)-B(8B)  | 126.8(3)  |
| C(1B)-B(3B)-B(7B)-B(6B)  | 18.6(4)   |
| B(8B)-B(3B)-B(7B)-B(6B)  | -82.6(3)  |
| B(4B)-B(3B)-B(7B)-B(6B)  | -38.4(4)  |

|                          |           |
|--------------------------|-----------|
| B(2B)-B(3B)-B(7B)-B(6B)  | 44.2(3)   |
| C(1B)-B(2B)-B(7B)-B(10B) | -79.7(4)  |
| B(6B)-B(2B)-B(7B)-B(10B) | 22.4(3)   |
| B(5B)-B(2B)-B(7B)-B(10B) | -22.6(4)  |
| B(3B)-B(2B)-B(7B)-B(10B) | -105.0(4) |
| C(1B)-B(2B)-B(7B)-B(3B)  | 25.3(3)   |
| B(6B)-B(2B)-B(7B)-B(3B)  | 127.4(3)  |
| B(5B)-B(2B)-B(7B)-B(3B)  | 82.5(3)   |
| C(1B)-B(2B)-B(7B)-B(8B)  | -20.1(4)  |
| B(6B)-B(2B)-B(7B)-B(8B)  | 81.9(3)   |
| B(5B)-B(2B)-B(7B)-B(8B)  | 37.0(4)   |
| B(3B)-B(2B)-B(7B)-B(8B)  | -45.5(3)  |
| C(1B)-B(2B)-B(7B)-B(6B)  | -102.1(4) |
| B(5B)-B(2B)-B(7B)-B(6B)  | -44.9(3)  |
| B(3B)-B(2B)-B(7B)-B(6B)  | -127.4(3) |
| B(2B)-B(6B)-B(7B)-B(10B) | -155.0(3) |
| B(5B)-B(6B)-B(7B)-B(10B) | -109.2(4) |
| B(9B)-B(6B)-B(7B)-B(10B) | -51.1(3)  |
| B(10B)-B(6B)-B(7B)-B(3B) | 109.3(3)  |
| B(2B)-B(6B)-B(7B)-B(3B)  | -45.7(3)  |
| B(5B)-B(6B)-B(7B)-B(3B)  | 0.1(4)    |
| B(9B)-B(6B)-B(7B)-B(3B)  | 58.2(3)   |
| B(10B)-B(6B)-B(7B)-B(2B) | 155.0(3)  |
| B(5B)-B(6B)-B(7B)-B(2B)  | 45.8(3)   |
| B(9B)-B(6B)-B(7B)-B(2B)  | 103.9(3)  |
| B(10B)-B(6B)-B(7B)-B(8B) | 49.9(3)   |
| B(2B)-B(6B)-B(7B)-B(8B)  | -105.1(3) |
| B(5B)-B(6B)-B(7B)-B(8B)  | -59.3(3)  |
| B(9B)-B(6B)-B(7B)-B(8B)  | -1.2(3)   |
| C(1B)-B(4B)-B(8B)-B(10B) | 77.3(4)   |
| B(9B)-B(4B)-B(8B)-B(10B) | -23.6(3)  |
| B(3B)-B(4B)-B(8B)-B(10B) | 103.1(3)  |
| B(5B)-B(4B)-B(8B)-B(10B) | 20.3(4)   |
| C(1B)-B(4B)-B(8B)-B(3B)  | -25.8(3)  |
| B(9B)-B(4B)-B(8B)-B(3B)  | -126.7(3) |
| B(5B)-B(4B)-B(8B)-B(3B)  | -82.8(3)  |

|                          |           |
|--------------------------|-----------|
| C(1B)-B(4B)-B(8B)-B(7B)  | 18.1(4)   |
| B(9B)-B(4B)-B(8B)-B(7B)  | -82.8(3)  |
| B(3B)-B(4B)-B(8B)-B(7B)  | 43.9(3)   |
| B(5B)-B(4B)-B(8B)-B(7B)  | -38.8(4)  |
| C(1B)-B(4B)-B(8B)-B(9B)  | 100.9(3)  |
| B(3B)-B(4B)-B(8B)-B(9B)  | 126.7(3)  |
| B(5B)-B(4B)-B(8B)-B(9B)  | 43.9(3)   |
| C(1B)-B(3B)-B(8B)-B(10B) | -78.3(4)  |
| B(7B)-B(3B)-B(8B)-B(10B) | 23.4(3)   |
| B(4B)-B(3B)-B(8B)-B(10B) | -104.2(3) |
| B(2B)-B(3B)-B(8B)-B(10B) | -21.5(4)  |
| C(1B)-B(3B)-B(8B)-B(4B)  | 25.9(3)   |
| B(7B)-B(3B)-B(8B)-B(4B)  | 127.6(3)  |
| B(2B)-B(3B)-B(8B)-B(4B)  | 82.8(3)   |
| C(1B)-B(3B)-B(8B)-B(7B)  | -101.7(4) |
| B(4B)-B(3B)-B(8B)-B(7B)  | -127.6(3) |
| B(2B)-B(3B)-B(8B)-B(7B)  | -44.8(3)  |
| C(1B)-B(3B)-B(8B)-B(9B)  | -18.5(4)  |
| B(7B)-B(3B)-B(8B)-B(9B)  | 83.2(3)   |
| B(4B)-B(3B)-B(8B)-B(9B)  | -44.4(3)  |
| B(2B)-B(3B)-B(8B)-B(9B)  | 38.4(3)   |
| B(3B)-B(7B)-B(8B)-B(10B) | -153.9(4) |
| B(2B)-B(7B)-B(8B)-B(10B) | -107.6(4) |
| B(6B)-B(7B)-B(8B)-B(10B) | -49.5(3)  |
| B(10B)-B(7B)-B(8B)-B(4B) | 108.8(3)  |
| B(3B)-B(7B)-B(8B)-B(4B)  | -45.1(3)  |
| B(2B)-B(7B)-B(8B)-B(4B)  | 1.2(4)    |
| B(6B)-B(7B)-B(8B)-B(4B)  | 59.3(3)   |
| B(10B)-B(7B)-B(8B)-B(3B) | 153.9(4)  |
| B(2B)-B(7B)-B(8B)-B(3B)  | 46.3(3)   |
| B(6B)-B(7B)-B(8B)-B(3B)  | 104.4(3)  |
| B(10B)-B(7B)-B(8B)-B(9B) | 50.7(3)   |
| B(3B)-B(7B)-B(8B)-B(9B)  | -103.2(3) |
| B(2B)-B(7B)-B(8B)-B(9B)  | -56.9(3)  |
| B(6B)-B(7B)-B(8B)-B(9B)  | 1.2(3)    |
| C(1B)-B(5B)-B(9B)-B(10B) | 78.0(5)   |

|                          |           |
|--------------------------|-----------|
| B(6B)-B(5B)-B(9B)-B(10B) | -23.1(4)  |
| B(2B)-B(5B)-B(9B)-B(10B) | 21.1(4)   |
| B(4B)-B(5B)-B(9B)-B(10B) | 103.9(4)  |
| C(1B)-B(5B)-B(9B)-B(4B)  | -25.8(3)  |
| B(6B)-B(5B)-B(9B)-B(4B)  | -127.0(3) |
| B(2B)-B(5B)-B(9B)-B(4B)  | -82.8(3)  |
| C(1B)-B(5B)-B(9B)-B(6B)  | 101.1(4)  |
| B(2B)-B(5B)-B(9B)-B(6B)  | 44.2(3)   |
| B(4B)-B(5B)-B(9B)-B(6B)  | 127.0(3)  |
| C(1B)-B(5B)-B(9B)-B(8B)  | 19.0(4)   |
| B(6B)-B(5B)-B(9B)-B(8B)  | -82.2(3)  |
| B(2B)-B(5B)-B(9B)-B(8B)  | -38.0(4)  |
| B(4B)-B(5B)-B(9B)-B(8B)  | 44.8(3)   |
| C(1B)-B(4B)-B(9B)-B(10B) | -78.4(4)  |
| B(8B)-B(4B)-B(9B)-B(10B) | 23.2(3)   |
| B(3B)-B(4B)-B(9B)-B(10B) | -21.8(4)  |
| B(5B)-B(4B)-B(9B)-B(10B) | -104.3(4) |
| C(1B)-B(4B)-B(9B)-B(5B)  | 25.9(3)   |
| B(8B)-B(4B)-B(9B)-B(5B)  | 127.5(3)  |
| B(3B)-B(4B)-B(9B)-B(5B)  | 82.5(3)   |
| C(1B)-B(4B)-B(9B)-B(6B)  | -19.4(4)  |
| B(8B)-B(4B)-B(9B)-B(6B)  | 82.2(3)   |
| B(3B)-B(4B)-B(9B)-B(6B)  | 37.2(4)   |
| B(5B)-B(4B)-B(9B)-B(6B)  | -45.3(3)  |
| C(1B)-B(4B)-B(9B)-B(8B)  | -101.6(3) |
| B(3B)-B(4B)-B(9B)-B(8B)  | -45.1(3)  |
| B(5B)-B(4B)-B(9B)-B(8B)  | -127.5(3) |
| B(2B)-B(6B)-B(9B)-B(10B) | 108.9(4)  |
| B(5B)-B(6B)-B(9B)-B(10B) | 154.2(4)  |
| B(7B)-B(6B)-B(9B)-B(10B) | 50.1(3)   |
| B(10B)-B(6B)-B(9B)-B(5B) | -154.2(4) |
| B(2B)-B(6B)-B(9B)-B(5B)  | -45.4(3)  |
| B(7B)-B(6B)-B(9B)-B(5B)  | -104.1(3) |
| B(10B)-B(6B)-B(9B)-B(4B) | -107.8(4) |
| B(2B)-B(6B)-B(9B)-B(4B)  | 1.0(4)    |
| B(5B)-B(6B)-B(9B)-B(4B)  | 46.4(3)   |

|                          |           |
|--------------------------|-----------|
| B(7B)-B(6B)-B(9B)-B(4B)  | -57.7(3)  |
| B(10B)-B(6B)-B(9B)-B(8B) | -48.9(3)  |
| B(2B)-B(6B)-B(9B)-B(8B)  | 59.9(4)   |
| B(5B)-B(6B)-B(9B)-B(8B)  | 105.3(3)  |
| B(7B)-B(6B)-B(9B)-B(8B)  | 1.2(3)    |
| B(4B)-B(8B)-B(9B)-B(10B) | -154.0(3) |
| B(3B)-B(8B)-B(9B)-B(10B) | -108.4(3) |
| B(7B)-B(8B)-B(9B)-B(10B) | -50.1(3)  |
| B(10B)-B(8B)-B(9B)-B(5B) | 108.0(4)  |
| B(4B)-B(8B)-B(9B)-B(5B)  | -46.0(3)  |
| B(3B)-B(8B)-B(9B)-B(5B)  | -0.3(4)   |
| B(7B)-B(8B)-B(9B)-B(5B)  | 57.9(3)   |
| B(10B)-B(8B)-B(9B)-B(4B) | 154.0(3)  |
| B(3B)-B(8B)-B(9B)-B(4B)  | 45.7(3)   |
| B(7B)-B(8B)-B(9B)-B(4B)  | 103.9(3)  |
| B(10B)-B(8B)-B(9B)-B(6B) | 48.9(3)   |
| B(4B)-B(8B)-B(9B)-B(6B)  | -105.1(3) |
| B(3B)-B(8B)-B(9B)-B(6B)  | -59.5(3)  |
| B(7B)-B(8B)-B(9B)-B(6B)  | -1.2(3)   |
| B(2B)-B(6B)-B(10B)-B(7B) | 23.2(3)   |
| B(5B)-B(6B)-B(10B)-B(7B) | 90.0(4)   |
| B(9B)-B(6B)-B(10B)-B(7B) | 113.8(3)  |
| B(2B)-B(6B)-B(10B)-B(8B) | -34.2(5)  |
| B(5B)-B(6B)-B(10B)-B(8B) | 32.7(5)   |
| B(9B)-B(6B)-B(10B)-B(8B) | 56.5(3)   |
| B(7B)-B(6B)-B(10B)-B(8B) | -57.3(3)  |
| B(2B)-B(6B)-B(10B)-B(9B) | -90.6(4)  |
| B(5B)-B(6B)-B(10B)-B(9B) | -23.8(4)  |
| B(7B)-B(6B)-B(10B)-B(9B) | -113.8(3) |
| B(3B)-B(7B)-B(10B)-B(6B) | -90.2(4)  |
| B(2B)-B(7B)-B(10B)-B(6B) | -23.0(3)  |
| B(8B)-B(7B)-B(10B)-B(6B) | -114.6(3) |
| B(3B)-B(7B)-B(10B)-B(8B) | 24.4(3)   |
| B(2B)-B(7B)-B(10B)-B(8B) | 91.6(3)   |
| B(6B)-B(7B)-B(10B)-B(8B) | 114.6(3)  |
| B(3B)-B(7B)-B(10B)-B(9B) | -32.9(5)  |

|                          |           |
|--------------------------|-----------|
| B(2B)-B(7B)-B(10B)-B(9B) | 34.3(4)   |
| B(8B)-B(7B)-B(10B)-B(9B) | -57.3(3)  |
| B(6B)-B(7B)-B(10B)-B(9B) | 57.2(3)   |
| B(4B)-B(8B)-B(10B)-B(6B) | -32.4(4)  |
| B(3B)-B(8B)-B(10B)-B(6B) | 33.9(4)   |
| B(7B)-B(8B)-B(10B)-B(6B) | 57.8(3)   |
| B(9B)-B(8B)-B(10B)-B(6B) | -56.2(3)  |
| B(4B)-B(8B)-B(10B)-B(7B) | -90.2(3)  |
| B(3B)-B(8B)-B(10B)-B(7B) | -23.9(3)  |
| B(9B)-B(8B)-B(10B)-B(7B) | -114.0(3) |
| B(4B)-B(8B)-B(10B)-B(9B) | 23.9(3)   |
| B(3B)-B(8B)-B(10B)-B(9B) | 90.2(3)   |
| B(7B)-B(8B)-B(10B)-B(9B) | 114.0(3)  |
| B(5B)-B(9B)-B(10B)-B(6B) | 24.0(4)   |
| B(4B)-B(9B)-B(10B)-B(6B) | 91.5(3)   |
| B(8B)-B(9B)-B(10B)-B(6B) | 115.6(3)  |
| B(5B)-B(9B)-B(10B)-B(7B) | -34.1(5)  |
| B(4B)-B(9B)-B(10B)-B(7B) | 33.4(4)   |
| B(6B)-B(9B)-B(10B)-B(7B) | -58.1(3)  |
| B(8B)-B(9B)-B(10B)-B(7B) | 57.5(3)   |
| B(5B)-B(9B)-B(10B)-B(8B) | -91.6(4)  |
| B(4B)-B(9B)-B(10B)-B(8B) | -24.1(3)  |
| B(6B)-B(9B)-B(10B)-B(8B) | -115.6(3) |
| C(4T)-O(1T)-C(1T)-C(2T)  | 6.1(9)    |
| K(1)-O(1T)-C(1T)-C(2T)   | 131.4(7)  |
| O(1T)-C(1T)-C(2T)-C(3T)  | 5.9(12)   |
| C(1T)-C(2T)-C(3T)-C(4T)  | -15.5(15) |
| C(1T)-O(1T)-C(4T)-C(3T)  | -15.9(10) |
| K(1)-O(1T)-C(4T)-C(3T)   | -145.9(8) |
| C(2T)-C(3T)-C(4T)-O(1T)  | 19.4(14)  |
| C(8T)-O(2T)-C(5T)-C(6T)  | -17.6(11) |
| K(1)-O(2T)-C(5T)-C(6T)   | 160.3(5)  |
| O(2T)-C(5T)-C(6T)-C(7T)  | -5.0(10)  |
| C(5T)-C(6T)-C(7T)-C(8T)  | 23.5(10)  |
| C(5T)-O(2T)-C(8T)-C(7T)  | 33.2(12)  |
| K(1)-O(2T)-C(8T)-C(7T)   | -145.1(7) |

|                             |            |
|-----------------------------|------------|
| C(6T)-C(7T)-C(8T)-O(2T)     | -35.6(12)  |
| C(12T)-O(3T)-C(9T)-C(10T)   | 30.0(18)   |
| K(1)-O(3T)-C(9T)-C(10T)     | -125.8(12) |
| O(3T)-C(9T)-C(10T)-C(11T)   | -26(2)     |
| C(9T)-C(10T)-C(11T)-C(12T)  | 12(2)      |
| C(9T)-O(3T)-C(12T)-C(11T)   | -22(2)     |
| K(1)-O(3T)-C(12T)-C(11T)    | 137.9(14)  |
| C(10T)-C(11T)-C(12T)-O(3T)  | 5(3)       |
| C(12U)-O(3U)-C(9U)-C(10U)   | -13(3)     |
| K(1)-O(3U)-C(9U)-C(10U)     | 165.4(17)  |
| O(3U)-C(9U)-C(10U)-C(11U)   | 30(2)      |
| C(9U)-C(10U)-C(11U)-C(12U)  | -35.9(17)  |
| C(9U)-O(3U)-C(12U)-C(11U)   | -11(3)     |
| K(1)-O(3U)-C(12U)-C(11U)    | 170.6(11)  |
| C(10U)-C(11U)-C(12U)-O(3U)  | 29(2)      |
| C(16T)-O(4T)-C(13T)-C(14T)  | -35.7(13)  |
| K(1)-O(4T)-C(13T)-C(14T)    | 130.2(9)   |
| O(4T)-C(13T)-C(14T)-C(15T)  | 26.6(15)   |
| C(13T)-C(14T)-C(15T)-C(16T) | -8.5(15)   |
| C(13T)-O(4T)-C(16T)-C(15T)  | 30.5(12)   |
| K(1)-O(4T)-C(16T)-C(15T)    | -136.7(7)  |
| C(14T)-C(15T)-C(16T)-O(4T)  | -13.0(14)  |
| C(16U)-O(4U)-C(13U)-C(14U)  | -15(3)     |
| K(1)-O(4U)-C(13U)-C(14U)    | 132(2)     |
| O(4U)-C(13U)-C(14U)-C(15U)  | 39(2)      |
| C(13U)-C(14U)-C(15U)-C(16U) | -46(2)     |
| C(13U)-O(4U)-C(16U)-C(15U)  | -16(3)     |
| K(1)-O(4U)-C(16U)-C(15U)    | -168(2)    |
| C(14U)-C(15U)-C(16U)-O(4U)  | 39(3)      |
| C(20T)-O(5T)-C(17T)-C(18T)  | -31(3)     |
| K(3)-O(5T)-C(17T)-C(18T)    | 136(2)     |
| O(5T)-C(17T)-C(18T)-C(19T)  | 11(3)      |
| C(17T)-C(18T)-C(19T)-C(20T) | 12(3)      |
| C(17T)-O(5T)-C(20T)-C(19T)  | 38(3)      |
| K(3)-O(5T)-C(20T)-C(19T)    | -132(2)    |
| C(18T)-C(19T)-C(20T)-O(5T)  | -31(3)     |



|                              |            |
|------------------------------|------------|
| C(20U)-O(5U)-C(17U)-C(18U)   | 21(3)      |
| K(3)-O(5U)-C(17U)-C(18U)     | -165(2)    |
| O(5U)-C(17U)-C(18U)-C(19U)   | -17(3)     |
| C(17U)-C(18U)-C(19U)-C(20U)  | 7(3)       |
| C(17U)-O(5U)-C(20U)-C(19U)   | -16(3)     |
| K(3)-O(5U)-C(20U)-C(19U)     | 169.0(19)  |
| C(18U)-C(19U)-C(20U)-O(5U)   | 4(3)       |
| C(24T)-O(6T)-C(21T)-C(22T)   | -15(2)     |
| K(3)-O(6T)-C(21T)-C(22T)     | 138.9(12)  |
| O(6T)-C(21T)-C(22T)-C(23T)   | 29(2)      |
| C(21T)-C(22T)-C(23T)-C(24T)  | -32(3)     |
| C(21T)-O(6T)-C(24T)-C(23T)   | -6(3)      |
| K(3)-O(6T)-C(24T)-C(23T)     | -151.9(18) |
| C(22T)-C(23T)-C(24T)-O(6T)   | 24(3)      |
| C(25T)#1-O(7T)-C(25T)-C(26T) | -23.0(19)  |
| K(2)-O(7T)-C(25T)-C(26T)     | 126.6(14)  |
| O(7T)-C(25T)-C(26T)-C(26T)#1 | 13.5(12)   |
| C(25U)#1-O(7U)-C(25U)-C(26U) | 35(3)      |
| K(2)-O(7U)-C(25U)-C(26U)     | -160(3)    |
| O(7U)-C(25U)-C(26U)-C(26U)#1 | -21.1(19)  |
| C(29T)#1-O(8T)-C(29T)-C(30T) | 26(4)      |
| K(2)-O(8T)-C(29T)-C(30T)     | 141.8(16)  |
| O(8T)-C(29T)-C(30T)-C(30T)#1 | -16(2)     |
| C(29U)#1-O(8U)-C(29U)-C(30U) | -35(3)     |
| K(2)-O(8U)-C(29U)-C(30U)     | 170(3)     |
| O(8U)-C(29U)-C(30U)-C(30U)#1 | 21(2)      |
| C(36T)-O(9T)-C(33T)-C(34T)   | -33.9(18)  |
| K(2)-O(9T)-C(33T)-C(34T)     | 122.2(14)  |
| O(9T)-C(33T)-C(34T)-C(35T)   | 38(2)      |
| C(33T)-C(34T)-C(35T)-C(36T)  | -29(3)     |
| C(33T)-O(9T)-C(36T)-C(35T)   | 15(2)      |
| K(2)-O(9T)-C(36T)-C(35T)     | -135.5(18) |
| C(34T)-C(35T)-C(36T)-O(9T)   | 10(3)      |

---

Symmetry transformations used to generate equivalent atoms:

#1  $-x+1/2,y,z$  #2  $-x,-y,z$



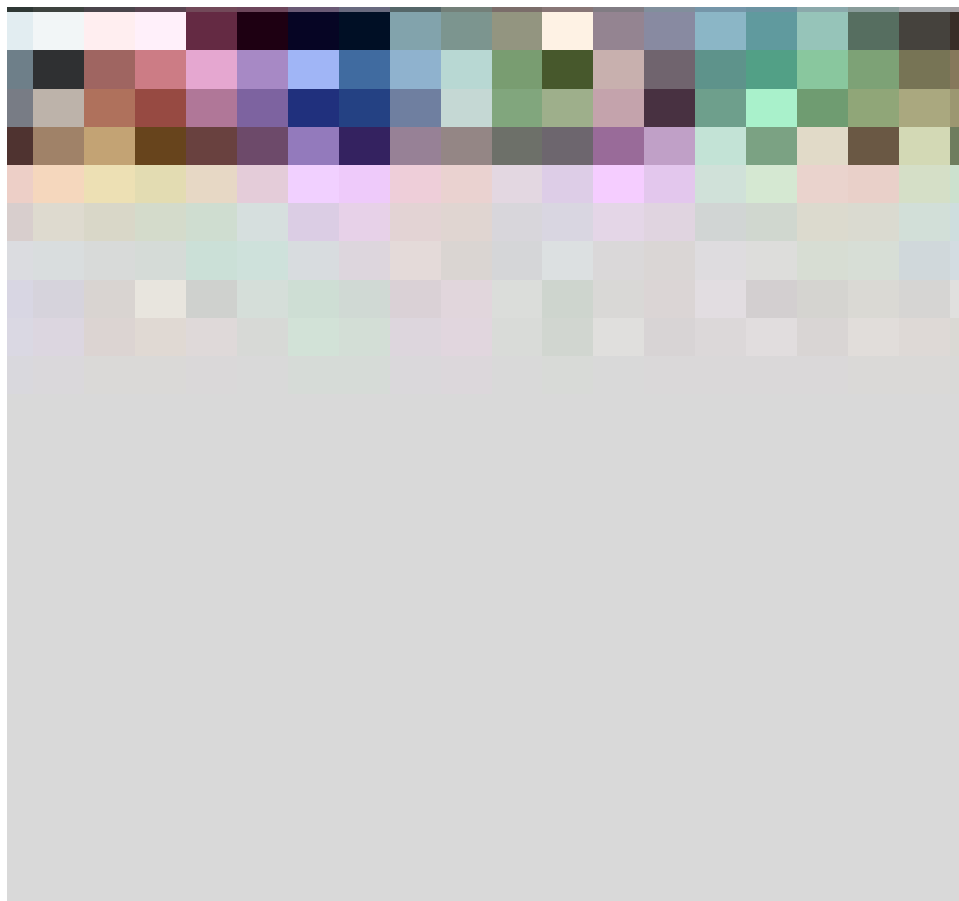

Fig. S29. Solid-state structure of the dimeric 10-Vertex tri-anionic doubly deprotonated NHC **12**[Li<sup>+</sup>]. Boron = brown, carbon= gray, nitrogen= blue, lithium= purple. For clarity, six molecules of coordinated THF have been omitted from the lithium counteranions shown, as well as two additional Li<sup>+</sup> cations. The crystal structure is dimeric with the C-2 center bound to a single lithium cation and the C-5 center bridging two other lithium cations. This dimeric structure is analogous to the X-ray diffraction study of the trianionic doubly deprotonated C-2/C-5 species possessing 12-vertex carborane clusters.

### X-Ray Structure Determination for **12**

A colorless needle fragment (0.531 x 0.211 x 0.066 mm<sup>3</sup>) was used for the single crystal x-ray diffraction study of [Li[C<sub>4</sub>H<sub>8</sub>O]<sub>4</sub>]<sup>+</sup>·[[C<sub>5</sub>H<sub>19</sub>B<sub>18</sub>]Li<sub>2</sub>[C<sub>4</sub>H<sub>8</sub>O]<sub>3</sub>]<sup>-</sup>·[C<sub>4</sub>H<sub>8</sub>O] (sample vL275SL\_0m-5). The crystal was coated with paratone oil and mounted on to a cryo-loop glass fiber. X-ray intensity data were collected at 190(2) K on a Bruker APEX2 platform-CCD x-ray diffractometer system (fine focus Mo-radiation, λ = 0.71073 Å, 50KV/30mA power). The CCD detector was placed at a distance of 5.0600 cm from the crystal.

A total of 3600 frames were collected for a sphere of reflections (with scan width of  $0.3^\circ$  in  $\omega$ , starting  $\omega$  and  $2\theta$  angles of  $-30^\circ$ , and  $\phi$  angles of  $0^\circ$ ,  $90^\circ$ ,  $120^\circ$ ,  $180^\circ$ ,  $240^\circ$ , and  $270^\circ$  for every 600 frames, 120 sec/frame exposure time). The Bruker Cell\_Now program was used to obtain the two different orientation matrices of the rotational twin components (Twin law is  $180^\circ$  rotation about the 0 0 1 reciprocal axis). These matrices were imported into the APEX2 program for Bravais lattice determination and initial unit cell refinement. The frames were integrated using the Bruker SAINT software package and using a narrow-frame integration algorithm. Based on a triclinic crystal system, the integrated frames yielded a total of 14348 reflections at a maximum  $2\theta$  angle of  $39.174^\circ$  ( $1.06 \text{ \AA}$  resolution), of which 4819 were independent reflections ( $R_{\text{int}} = 0.0308$ ,  $R_{\text{sig}} = 0.0370$ , redundancy = 3.0, completeness = 48.5%) and 3759 (78.0%) reflections were greater than  $2\sigma(I)$ . The unit cell parameters were,  $\mathbf{a} = 9.5622(10) \text{ \AA}$ ,  $\mathbf{b} = 18.2827(19) \text{ \AA}$ ,  $\mathbf{c} = 18.5319(19) \text{ \AA}$ ,  $\alpha = 114.0568(16)^\circ$ ,  $\beta = 100.8752(17)^\circ$ ,  $\gamma = 102.6755(17)^\circ$ ,  $V = 2742.0(5) \text{ \AA}^3$ ,  $Z = 2$ , calculated density  $D_c = 1.086 \text{ g/cm}^3$ . Absorption corrections were applied (absorption coefficient  $\mu = 0.066 \text{ mm}^{-1}$ ; max/min transmission = 0.996/0.966) to the raw intensity data using the TWINABS program.

The Bruker SHELXTL software package was used for phase determination and structure refinement. The distribution of intensities ( $E^2-1 = 0.854$ ) and no systematic absent reflections indicated two possible space groups, P-1 and P1. The space group P-1 (#2) was later determined to be correct. Direct methods of phase determination followed by two Fourier cycles of refinement led to an electron density map from which most of the non-hydrogen atoms were identified in the asymmetric unit of the unit cell. With subsequent isotropic refinement, all of the non-hydrogen atoms were identified. The combined (major and minor components) HKLF 5 intensity dataset was used in the final structure refinement. There were one disordered cation of  $\text{Li}[\text{C}_4\text{H}_8\text{O}]_4$ , one anion of  $[\text{C}_5\text{H}_{19}\text{B}_{18}]\text{Li}_2[\text{C}_4\text{H}_8\text{O}]_3$ , and one partially occupied (96% occupied) THF solvent molecule present in the asymmetric unit of the unit cell. The dimer-anion was located at the inversion center. Six of the eight THF molecules were modeled with disordered (disordered site occupancy ratios were 70%/30%, 61%/39%, 59%/41%, 59%/41%, 56%/44% and 50%/50%). The rotational twin law was  $180^\circ$  rotation about the 0 0 1 reciprocal axis. The major/minor component twin ratio was 59%/41%. The crystal cracks at 100K due to low temperature phase transition and data was collected at 190K. The A and B-level alerts are due to the poor crystal quality, incomplete data set, and the six highly disordered THF molecules where rigid model restraints were used. Because of the twinning/disorder issues, only about 49% of the triclinic data were collected at long exposure time of 120 second/frame.

Atomic coordinates, isotropic and anisotropic displacement parameters of all the non-hydrogen atoms were refined by means of a full matrix least-squares procedure on  $F^2$ . The H-atoms were included in the refinement in calculated positions riding on the atoms to which they were attached. The refinement converged at  $R1 = 0.0703$ ,  $wR2 = 0.1722$ , with intensity  $I > 2\sigma(I)$ . The largest peak/hole in the final difference map was  $0.228/-0.217 \text{ e/\AA}^3$ .

**Table S7.** Crystal data and structure refinement for vL275SL\_0m-5.

|                                   |                                             |                                 |
|-----------------------------------|---------------------------------------------|---------------------------------|
| Identification code               | vL275SL_0m-5                                |                                 |
| Empirical formula                 | C36.83 H82.67 B18 Li3 N2 O7.96              |                                 |
| Formula weight                    | 896.49                                      |                                 |
| Temperature                       | 190(2) K                                    |                                 |
| Wavelength                        | 0.71073 Å                                   |                                 |
| Crystal system                    | Triclinic                                   |                                 |
| Space group                       | P -1                                        |                                 |
| Unit cell dimensions              | a = 9.5622(10) Å                            | $\alpha = 114.0568(16)^\circ$ . |
|                                   | b = 18.2827(19) Å                           | $\beta = 100.8752(17)^\circ$ .  |
|                                   | c = 18.5319(19) Å                           | $\gamma = 102.6755(17)^\circ$ . |
| Volume                            | 2742.0(5) Å <sup>3</sup>                    |                                 |
| Z                                 | 2                                           |                                 |
| Density (calculated)              | 1.086 Mg/m <sup>3</sup>                     |                                 |
| Absorption coefficient            | 0.066 mm <sup>-1</sup>                      |                                 |
| F(000)                            | 961                                         |                                 |
| Crystal size                      | 0.531 x 0.211 x 0.066 mm <sup>3</sup>       |                                 |
| Theta range for data collection   | 2.193 to 19.587°.                           |                                 |
| Index ranges                      | -9<=h<=8, -17<=k<=15, 0<=l<=17              |                                 |
| Reflections collected             | 14348                                       |                                 |
| Independent reflections           | 4819 [R(int) = 0.0308]                      |                                 |
| Completeness to theta = 25.242°   | 48.5 %                                      |                                 |
| Absorption correction             | Semi-empirical from equivalents             |                                 |
| Refinement method                 | Full-matrix least-squares on F <sup>2</sup> |                                 |
| Data / restraints / parameters    | 4819 / 1104 / 797                           |                                 |
| Goodness-of-fit on F <sup>2</sup> | 1.060                                       |                                 |
| Final R indices [I>2sigma(I)]     | R1 = 0.0703, wR2 = 0.1722                   |                                 |
| R indices (all data)              | R1 = 0.0949, wR2 = 0.1904                   |                                 |
| Extinction coefficient            | n/a                                         |                                 |
| Largest diff. peak and hole       | 0.228 and -0.217 e.Å <sup>-3</sup>          |                                 |

**Table S8.** Atomic coordinates ( $\times 10^4$ ) and equivalent isotropic displacement parameters ( $\text{\AA}^2 \times 10^3$ )

for vL275SL\_0m-5.  $U(\text{eq})$  is defined as one third of the trace of the orthogonalized  $U_{ij}$  tensor.

|        | x        | y        | z        | U(eq)  |
|--------|----------|----------|----------|--------|
| N(1)   | 3525(5)  | 2517(3)  | -717(3)  | 55(1)  |
| C(2)   | 4389(6)  | 2768(3)  | 71(4)    | 56(2)  |
| N(3)   | 5065(5)  | 3612(3)  | 355(3)   | 52(1)  |
| C(4)   | 4695(6)  | 3929(3)  | -217(4)  | 55(2)  |
| C(5)   | 3693(6)  | 3201(3)  | -889(4)  | 57(2)  |
| C(1A)  | 2519(6)  | 1673(3)  | -1273(3) | 58(2)  |
| B(2A)  | 877(8)   | 1270(4)  | -1238(5) | 78(2)  |
| B(3A)  | 2434(8)  | 861(4)   | -1129(4) | 65(2)  |
| B(4A)  | 2828(9)  | 972(4)   | -2012(4) | 72(2)  |
| B(5A)  | 1273(9)  | 1400(4)  | -2093(5) | 85(2)  |
| B(6A)  | -305(10) | 547(5)   | -2258(6) | 99(3)  |
| B(7A)  | 500(9)   | 161(4)   | -1586(5) | 85(2)  |
| B(8A)  | 1854(9)  | -62(4)   | -2135(4) | 71(2)  |
| B(9A)  | 1027(10) | 314(4)   | -2826(5) | 91(3)  |
| B(10A) | 13(10)   | -390(5)  | -2615(5) | 95(3)  |
| C(1B)  | 6080(6)  | 4164(3)  | 1190(3)  | 54(1)  |
| B(2B)  | 5692(9)  | 4324(5)  | 2033(5)  | 76(2)  |
| B(3B)  | 6265(8)  | 5140(4)  | 1719(4)  | 64(2)  |
| B(4B)  | 7765(8)  | 4750(4)  | 1417(5)  | 75(2)  |
| B(5B)  | 7200(8)  | 3932(5)  | 1730(4)  | 75(2)  |
| B(6B)  | 7383(10) | 4544(6)  | 2812(5)  | 95(3)  |
| B(7B)  | 6745(9)  | 5403(5)  | 2792(5)  | 85(2)  |
| B(8B)  | 8173(9)  | 5700(5)  | 2361(5)  | 87(2)  |
| B(9B)  | 8852(9)  | 4843(5)  | 2379(5)  | 94(3)  |
| B(10B) | 8561(10) | 5546(6)  | 3197(5)  | 99(3)  |
| Li(1)  | 4944(10) | 2052(7)  | 629(6)   | 83(3)  |
| Li(2)  | 3839(11) | 4987(6)  | 181(7)   | 71(3)  |
| Li(4)  | 5099(13) | 7832(4)  | 4302(8)  | 100(4) |
| O(1T)  | 6130(20) | 1379(15) | 228(12)  | 90(3)  |
| C(1T)  | 7320(20) | 1333(17) | 792(11)  | 116(7) |

|        |          |          |          |        |
|--------|----------|----------|----------|--------|
| C(2T)  | 8400(20) | 1050(20) | 327(14)  | 152(8) |
| C(3T)  | 7430(30) | 614(18)  | -580(12) | 130(8) |
| C(4T)  | 6430(20) | 1163(18) | -555(11) | 105(6) |
| O(1U)  | 6470(14) | 1561(8)  | 426(8)   | 90(3)  |
| C(1U)  | 6860(20) | 908(9)   | 568(8)   | 108(5) |
| C(2U)  | 7450(20) | 437(9)   | -126(9)  | 117(5) |
| C(3U)  | 6880(20) | 685(9)   | -790(6)  | 110(5) |
| C(4U)  | 6950(20) | 1589(9)  | -257(11) | 119(5) |
| O(2T)  | 4060(40) | 1820(20) | 1377(17) | 118(8) |
| C(5T)  | 2570(40) | 1860(30) | 1119(12) | 117(8) |
| C(6T)  | 2040(30) | 2160(20) | 1867(16) | 123(6) |
| C(7T)  | 3440(30) | 2455(16) | 2599(11) | 135(7) |
| C(8T)  | 4320(30) | 1880(20) | 2196(17) | 142(8) |
| O(2U)  | 3929(19) | 1822(12) | 1331(10) | 89(4)  |
| C(5U)  | 2359(18) | 1735(16) | 1235(9)  | 93(5)  |
| C(6U)  | 2320(20) | 2233(17) | 2115(11) | 152(7) |
| C(7U)  | 3470(20) | 1992(17) | 2590(9)  | 167(7) |
| C(8U)  | 4698(18) | 2035(16) | 2168(11) | 138(5) |
| O(3T)  | 2005(4)  | 4727(2)  | 444(3)   | 78(1)  |
| C(9T)  | 736(7)   | 4053(5)  | -250(5)  | 98(2)  |
| C(10T) | 33(8)    | 3461(4)  | 52(5)    | 100(2) |
| C(11T) | 1184(8)  | 3718(4)  | 850(5)   | 101(2) |
| C(12T) | 1955(7)  | 4661(4)  | 1179(4)  | 88(2)  |
| O(4T)  | 4010(6)  | 7689(3)  | 3253(3)  | 107(2) |
| C(13T) | 4405(9)  | 7330(5)  | 2499(5)  | 113(2) |
| C(14T) | 3179(10) | 7185(6)  | 1819(6)  | 137(3) |
| C(15T) | 1898(16) | 7260(20) | 2135(7)  | 134(6) |
| C(15U) | 2370(30) | 7730(18) | 2220(9)  | 134(6) |
| C(16T) | 2572(10) | 7759(6)  | 3040(5)  | 133(3) |
| O(5T)  | 7206(5)  | 8111(3)  | 4437(3)  | 113(2) |
| C(17T) | 8180(10) | 8895(6)  | 4551(10) | 133(4) |
| C(18T) | 9668(10) | 8789(7)  | 4513(10) | 115(4) |
| C(19T) | 9602(11) | 7966(7)  | 4505(12) | 147(5) |
| C(20T) | 8169(11) | 7684(7)  | 4691(9)  | 130(4) |
| C(17U) | 7823(16) | 7956(18) | 3761(8)  | 126(7) |
| C(18U) | 9512(16) | 8270(20) | 4129(14) | 109(7) |

|        |           |          |          |         |
|--------|-----------|----------|----------|---------|
| C(19U) | 9775(14)  | 8400(20) | 5015(13) | 135(9)  |
| C(20U) | 8404(17)  | 8650(20) | 5207(8)  | 186(11) |
| O(6T)  | 4230(20)  | 6826(10) | 4349(15) | 141(7)  |
| C(21T) | 5290(20)  | 6794(9)  | 4980(13) | 172(6)  |
| C(22T) | 4590(30)  | 5976(12) | 4989(13) | 198(6)  |
| C(23T) | 3550(30)  | 5400(7)  | 4102(14) | 198(6)  |
| C(24T) | 3140(30)  | 6008(11) | 3815(13) | 172(6)  |
| O(6U)  | 4430(20)  | 6794(8)  | 4339(11) | 101(4)  |
| C(21U) | 4660(20)  | 6520(9)  | 4968(8)  | 148(5)  |
| C(22U) | 4320(20)  | 5565(9)  | 4456(12) | 164(5)  |
| C(23U) | 3020(20)  | 5324(8)  | 3710(11) | 164(5)  |
| C(24U) | 3210(30)  | 6129(10) | 3634(11) | 148(5)  |
| O(7T)  | 4919(14)  | 8755(7)  | 5197(5)  | 108(4)  |
| C(25T) | 6046(10)  | 9341(9)  | 5973(7)  | 133(5)  |
| C(26T) | 5250(13)  | 9774(11) | 6559(8)  | 194(9)  |
| C(27T) | 3665(13)  | 9166(11) | 6196(7)  | 156(5)  |
| C(28T) | 3452(11)  | 8730(10) | 5271(6)  | 138(4)  |
| O(7U)  | 4740(30)  | 8655(11) | 5208(10) | 139(7)  |
| C(25U) | 4770(30)  | 9493(13) | 5352(11) | 170(7)  |
| C(26U) | 4300(30)  | 9870(12) | 6124(12) | 170(7)  |
| C(27U) | 4880(30)  | 9421(12) | 6604(8)  | 156(5)  |
| C(28U) | 4460(20)  | 8530(10) | 5892(11) | 138(4)  |
| O(1S)  | 8262(15)  | 2701(8)  | 3708(9)  | 266(6)  |
| C(1S)  | 9160(20)  | 2700(10) | 3154(11) | 230(7)  |
| C(2S)  | 10640(19) | 3319(8)  | 3688(10) | 241(7)  |
| C(3S)  | 10349(17) | 3900(8)  | 4319(8)  | 200(6)  |
| C(4S)  | 8928(17)  | 3462(12) | 4348(9)  | 228(7)  |

---



**Table S9.** Bond lengths [ $\text{\AA}$ ] and angles [ $^\circ$ ] for vL275SL\_0m-5.

|              |           |               |           |
|--------------|-----------|---------------|-----------|
| N(1)-C(2)    | 1.363(7)  | B(6A)-H(6A)   | 1.1200    |
| N(1)-C(5)    | 1.395(6)  | B(7A)-B(10A)  | 1.662(11) |
| N(1)-C(1A)   | 1.431(7)  | B(7A)-B(8A)   | 1.808(11) |
| C(2)-N(3)    | 1.359(6)  | B(7A)-H(7A)   | 1.1200    |
| C(2)-Li(1)   | 2.066(11) | B(8A)-B(10A)  | 1.661(11) |
| N(3)-C(4)    | 1.425(6)  | B(8A)-B(9A)   | 1.821(11) |
| N(3)-C(1B)   | 1.444(6)  | B(8A)-H(8A)   | 1.1200    |
| C(4)-C(5)    | 1.370(7)  | B(9A)-B(10A)  | 1.660(12) |
| C(4)-Li(2)#1 | 2.130(11) | B(9A)-H(9A)   | 1.1200    |
| C(4)-Li(2)   | 2.171(10) | B(10A)-H(10A) | 1.1200    |
| C(5)-H(5)    | 0.9500    | C(1B)-B(5B)   | 1.572(8)  |
| C(1A)-B(5A)  | 1.554(9)  | C(1B)-B(4B)   | 1.594(9)  |
| C(1A)-B(4A)  | 1.579(8)  | C(1B)-B(3B)   | 1.596(8)  |
| C(1A)-B(3A)  | 1.601(8)  | C(1B)-B(2B)   | 1.600(9)  |
| C(1A)-B(2A)  | 1.607(9)  | B(2B)-B(7B)   | 1.792(11) |
| B(2A)-B(6A)  | 1.760(12) | B(2B)-B(6B)   | 1.795(11) |
| B(2A)-B(7A)  | 1.783(10) | B(2B)-B(3B)   | 1.827(10) |
| B(2A)-B(5A)  | 1.791(12) | B(2B)-B(5B)   | 1.828(10) |
| B(2A)-B(3A)  | 1.821(10) | B(2B)-H(2B)   | 1.1200    |
| B(2A)-H(2A)  | 1.1200    | B(3B)-B(8B)   | 1.779(10) |
| B(3A)-B(7A)  | 1.806(10) | B(3B)-B(7B)   | 1.782(10) |
| B(3A)-B(8A)  | 1.807(9)  | B(3B)-B(4B)   | 1.818(10) |
| B(3A)-B(4A)  | 1.826(10) | B(3B)-H(3B)   | 1.1200    |
| B(3A)-H(3A)  | 1.1200    | B(4B)-B(8B)   | 1.788(11) |
| B(4A)-B(8A)  | 1.813(9)  | B(4B)-B(9B)   | 1.806(11) |
| B(4A)-B(9A)  | 1.822(11) | B(4B)-B(5B)   | 1.827(11) |
| B(4A)-B(5A)  | 1.835(11) | B(4B)-H(4B)   | 1.1200    |
| B(4A)-H(4A)  | 1.1200    | B(5B)-B(9B)   | 1.793(11) |
| B(5A)-B(6A)  | 1.790(11) | B(5B)-B(6B)   | 1.803(11) |
| B(5A)-B(9A)  | 1.820(10) | B(5B)-H(5B)   | 1.1200    |
| B(5A)-H(5A)  | 1.1200    | B(6B)-B(10B)  | 1.692(12) |
| B(6A)-B(10A) | 1.687(11) | B(6B)-B(7B)   | 1.817(12) |
| B(6A)-B(7A)  | 1.798(12) | B(6B)-B(9B)   | 1.833(13) |
| B(6A)-B(9A)  | 1.814(13) | B(6B)-H(6B)   | 1.1200    |

|               |           |             |           |
|---------------|-----------|-------------|-----------|
| B(7B)-B(10B)  | 1.672(12) | O(1U)-C(4U) | 1.442(9)  |
| B(7B)-B(8B)   | 1.798(12) | C(1U)-C(2U) | 1.514(9)  |
| B(7B)-H(7B)   | 1.1200    | C(1U)-H(1C) | 0.9900    |
| B(8B)-B(10B)  | 1.672(12) | C(1U)-H(1D) | 0.9900    |
| B(8B)-B(9B)   | 1.831(12) | C(2U)-C(3U) | 1.523(9)  |
| B(8B)-H(8B)   | 1.1200    | C(2U)-H(2E) | 0.9900    |
| B(9B)-B(10B)  | 1.660(12) | C(2U)-H(2F) | 0.9900    |
| B(9B)-H(9B)   | 1.1200    | C(3U)-C(4U) | 1.521(9)  |
| B(10B)-H(10B) | 1.1200    | C(3U)-H(3E) | 0.9900    |
| Li(1)-O(1T)   | 1.885(9)  | C(3U)-H(3F) | 0.9900    |
| Li(1)-O(2U)   | 1.885(8)  | C(4U)-H(4E) | 0.9900    |
| Li(1)-O(2T)   | 1.891(9)  | C(4U)-H(4F) | 0.9900    |
| Li(1)-O(1U)   | 1.893(8)  | O(2T)-C(5T) | 1.435(9)  |
| Li(2)-O(3T)   | 1.921(10) | O(2T)-C(8T) | 1.447(10) |
| Li(2)-C(4)#1  | 2.130(11) | C(5T)-C(6T) | 1.500(9)  |
| Li(2)-Li(2)#1 | 2.432(19) | C(5T)-H(5C) | 0.9900    |
| Li(4)-O(6T)   | 1.890(10) | C(5T)-H(5D) | 0.9900    |
| Li(4)-O(7T)   | 1.892(10) | C(6T)-C(7T) | 1.523(10) |
| Li(4)-O(7U)   | 1.894(11) | C(6T)-H(6C) | 0.9900    |
| Li(4)-O(6U)   | 1.898(10) | C(6T)-H(6D) | 0.9900    |
| Li(4)-O(4T)   | 1.907(14) | C(7T)-C(8T) | 1.537(10) |
| Li(4)-O(5T)   | 1.907(13) | C(7T)-H(7C) | 0.9900    |
| O(1T)-C(1T)   | 1.429(9)  | C(7T)-H(7D) | 0.9900    |
| O(1T)-C(4T)   | 1.440(9)  | C(8T)-H(8C) | 0.9900    |
| C(1T)-C(2T)   | 1.514(10) | C(8T)-H(8D) | 0.9900    |
| C(1T)-H(1A)   | 0.9900    | O(2U)-C(8U) | 1.433(8)  |
| C(1T)-H(1B)   | 0.9900    | O(2U)-C(5U) | 1.443(8)  |
| C(2T)-C(3T)   | 1.520(10) | C(5U)-C(6U) | 1.524(9)  |
| C(2T)-H(2C)   | 0.9900    | C(5U)-H(5E) | 0.9900    |
| C(2T)-H(2D)   | 0.9900    | C(5U)-H(5F) | 0.9900    |
| C(3T)-C(4T)   | 1.530(10) | C(6U)-C(7U) | 1.535(10) |
| C(3T)-H(3C)   | 0.9900    | C(6U)-H(6E) | 0.9900    |
| C(3T)-H(3D)   | 0.9900    | C(6U)-H(6F) | 0.9900    |
| C(4T)-H(4C)   | 0.9900    | C(7U)-C(8U) | 1.530(10) |
| C(4T)-H(4D)   | 0.9900    | C(7U)-H(7E) | 0.9900    |
| O(1U)-C(1U)   | 1.432(8)  | C(7U)-H(7F) | 0.9900    |

|               |           |               |           |
|---------------|-----------|---------------|-----------|
| C(8U)-H(8E)   | 0.9900    | O(5T)-C(17U)  | 1.435(9)  |
| C(8U)-H(8F)   | 0.9900    | O(5T)-C(17T)  | 1.435(7)  |
| O(3T)-C(12T)  | 1.423(7)  | O(5T)-C(20U)  | 1.435(10) |
| O(3T)-C(9T)   | 1.452(7)  | O(5T)-C(20T)  | 1.459(7)  |
| C(9T)-C(10T)  | 1.501(9)  | C(17T)-C(18T) | 1.488(8)  |
| C(9T)-H(9C)   | 0.9900    | C(17T)-H(17A) | 0.9900    |
| C(9T)-H(9D)   | 0.9900    | C(17T)-H(17B) | 0.9900    |
| C(10T)-C(11T) | 1.487(9)  | C(18T)-C(19T) | 1.487(8)  |
| C(10T)-H(10C) | 0.9900    | C(18T)-H(18A) | 0.9900    |
| C(10T)-H(10D) | 0.9900    | C(18T)-H(18B) | 0.9900    |
| C(11T)-C(12T) | 1.518(9)  | C(19T)-C(20T) | 1.508(9)  |
| C(11T)-H(11A) | 0.9900    | C(19T)-H(19A) | 0.9900    |
| C(11T)-H(11B) | 0.9900    | C(19T)-H(19B) | 0.9900    |
| C(12T)-H(12A) | 0.9900    | C(20T)-H(20A) | 0.9900    |
| C(12T)-H(12B) | 0.9900    | C(20T)-H(20B) | 0.9900    |
| O(4T)-C(16T)  | 1.407(8)  | C(17U)-C(18U) | 1.505(9)  |
| O(4T)-C(13T)  | 1.444(8)  | C(17U)-H(17C) | 0.9900    |
| C(13T)-C(14T) | 1.438(10) | C(17U)-H(17D) | 0.9900    |
| C(13T)-H(13A) | 0.9900    | C(18U)-C(19U) | 1.522(10) |
| C(13T)-H(13B) | 0.9900    | C(18U)-H(18C) | 0.9900    |
| C(14T)-C(15U) | 1.444(9)  | C(18U)-H(18D) | 0.9900    |
| C(14T)-C(15T) | 1.463(10) | C(19U)-C(20U) | 1.534(10) |
| C(14T)-H(14A) | 0.9900    | C(19U)-H(19C) | 0.9900    |
| C(14T)-H(14B) | 0.9900    | C(19U)-H(19D) | 0.9900    |
| C(14T)-H(14C) | 0.9900    | C(20U)-H(20C) | 0.9900    |
| C(14T)-H(14D) | 0.9900    | C(20U)-H(20D) | 0.9900    |
| C(15T)-C(16T) | 1.465(10) | O(6T)-C(24T)  | 1.420(9)  |
| C(15T)-H(15A) | 0.9900    | O(6T)-C(21T)  | 1.429(9)  |
| C(15T)-H(15B) | 0.9900    | C(21T)-C(22T) | 1.506(9)  |
| C(15U)-C(16T) | 1.471(10) | C(21T)-H(21A) | 0.9900    |
| C(15U)-H(15C) | 0.9900    | C(21T)-H(21B) | 0.9900    |
| C(15U)-H(15D) | 0.9900    | C(22T)-C(23T) | 1.521(10) |
| C(16T)-H(16A) | 0.9900    | C(22T)-H(22A) | 0.9900    |
| C(16T)-H(16B) | 0.9900    | C(22T)-H(22B) | 0.9900    |
| C(16T)-H(16C) | 0.9900    | C(23T)-C(24T) | 1.506(9)  |
| C(16T)-H(16D) | 0.9900    | C(23T)-H(23A) | 0.9900    |

|               |           |                    |           |
|---------------|-----------|--------------------|-----------|
| C(23T)-H(23B) | 0.9900    | C(26U)-H(26D)      | 0.9900    |
| C(24T)-H(24A) | 0.9900    | C(27U)-C(28U)      | 1.522(10) |
| C(24T)-H(24B) | 0.9900    | C(27U)-H(27C)      | 0.9900    |
| O(6U)-C(24U)  | 1.434(9)  | C(27U)-H(27D)      | 0.9900    |
| O(6U)-C(21U)  | 1.446(9)  | C(28U)-H(28C)      | 0.9900    |
| C(21U)-C(22U) | 1.530(10) | C(28U)-H(28D)      | 0.9900    |
| C(21U)-H(21C) | 0.9900    | O(1S)-C(4S)        | 1.315(16) |
| C(21U)-H(21D) | 0.9900    | O(1S)-C(1S)        | 1.458(17) |
| C(22U)-C(23U) | 1.510(9)  | C(1S)-C(2S)        | 1.454(18) |
| C(22U)-H(22C) | 0.9900    | C(1S)-H(1E)        | 0.9900    |
| C(22U)-H(22D) | 0.9900    | C(1S)-H(1F)        | 0.9900    |
| C(23U)-C(24U) | 1.511(9)  | C(2S)-C(3S)        | 1.347(15) |
| C(23U)-H(23C) | 0.9900    | C(2S)-H(2G)        | 0.9900    |
| C(23U)-H(23D) | 0.9900    | C(2S)-H(2H)        | 0.9900    |
| C(24U)-H(24C) | 0.9900    | C(3S)-C(4S)        | 1.441(16) |
| C(24U)-H(24D) | 0.9900    | C(3S)-H(3G)        | 0.9900    |
| O(7T)-C(25T)  | 1.425(9)  | C(3S)-H(3H)        | 0.9900    |
| O(7T)-C(28T)  | 1.427(9)  | C(4S)-H(4G)        | 0.9900    |
| C(25T)-C(26T) | 1.503(9)  | C(4S)-H(4H)        | 0.9900    |
| C(25T)-H(25A) | 0.9900    |                    |           |
| C(25T)-H(25B) | 0.9900    | C(2)-N(1)-C(5)     | 111.0(4)  |
| C(26T)-C(27T) | 1.501(9)  | C(2)-N(1)-C(1A)    | 124.2(4)  |
| C(26T)-H(26A) | 0.9900    | C(5)-N(1)-C(1A)    | 124.8(5)  |
| C(26T)-H(26B) | 0.9900    | N(3)-C(2)-N(1)     | 102.1(4)  |
| C(27T)-C(28T) | 1.516(9)  | N(3)-C(2)-Li(1)    | 126.6(5)  |
| C(27T)-H(27A) | 0.9900    | N(1)-C(2)-Li(1)    | 130.0(5)  |
| C(27T)-H(27B) | 0.9900    | C(2)-N(3)-C(4)     | 116.1(4)  |
| C(28T)-H(28A) | 0.9900    | C(2)-N(3)-C(1B)    | 122.4(5)  |
| C(28T)-H(28B) | 0.9900    | C(4)-N(3)-C(1B)    | 121.5(4)  |
| O(7U)-C(25U)  | 1.436(9)  | C(5)-C(4)-N(3)     | 100.3(4)  |
| O(7U)-C(28U)  | 1.437(9)  | C(5)-C(4)-Li(2)#1  | 129.4(5)  |
| C(25U)-C(26U) | 1.515(10) | N(3)-C(4)-Li(2)#1  | 123.7(5)  |
| C(25U)-H(25C) | 0.9900    | C(5)-C(4)-Li(2)    | 114.1(5)  |
| C(25U)-H(25D) | 0.9900    | N(3)-C(4)-Li(2)    | 117.5(4)  |
| C(26U)-C(27U) | 1.542(10) | Li(2)#1-C(4)-Li(2) | 68.9(4)   |
| C(26U)-H(26C) | 0.9900    | C(4)-C(5)-N(1)     | 110.5(5)  |

|                   |          |                   |          |
|-------------------|----------|-------------------|----------|
| C(4)-C(5)-H(5)    | 124.8    | B(2A)-B(3A)-B(4A) | 90.1(5)  |
| N(1)-C(5)-H(5)    | 124.8    | C(1A)-B(3A)-H(3A) | 122.0    |
| N(1)-C(1A)-B(5A)  | 125.9(5) | B(7A)-B(3A)-H(3A) | 121.4    |
| N(1)-C(1A)-B(4A)  | 126.5(5) | B(8A)-B(3A)-H(3A) | 121.4    |
| B(5A)-C(1A)-B(4A) | 71.7(5)  | B(2A)-B(3A)-H(3A) | 131.0    |
| N(1)-C(1A)-B(3A)  | 125.5(5) | B(4A)-B(3A)-H(3A) | 130.7    |
| B(5A)-C(1A)-B(3A) | 108.6(5) | C(1A)-B(4A)-B(8A) | 108.7(5) |
| B(4A)-C(1A)-B(3A) | 70.1(4)  | C(1A)-B(4A)-B(9A) | 107.6(5) |
| N(1)-C(1A)-B(2A)  | 125.3(5) | B(8A)-B(4A)-B(9A) | 60.1(4)  |
| B(5A)-C(1A)-B(2A) | 69.0(5)  | C(1A)-B(4A)-B(3A) | 55.5(4)  |
| B(4A)-C(1A)-B(2A) | 108.1(5) | B(8A)-B(4A)-B(3A) | 59.5(4)  |
| B(3A)-C(1A)-B(2A) | 69.1(4)  | B(9A)-B(4A)-B(3A) | 101.3(5) |
| C(1A)-B(2A)-B(6A) | 108.7(6) | C(1A)-B(4A)-B(5A) | 53.5(4)  |
| C(1A)-B(2A)-B(7A) | 109.1(5) | B(8A)-B(4A)-B(5A) | 101.3(5) |
| B(6A)-B(2A)-B(7A) | 61.0(4)  | B(9A)-B(4A)-B(5A) | 59.7(4)  |
| C(1A)-B(2A)-B(5A) | 54.1(4)  | B(3A)-B(4A)-B(5A) | 88.8(5)  |
| B(6A)-B(2A)-B(5A) | 60.5(5)  | C(1A)-B(4A)-H(4A) | 122.1    |
| B(7A)-B(2A)-B(5A) | 103.0(5) | B(8A)-B(4A)-H(4A) | 121.0    |
| C(1A)-B(2A)-B(3A) | 55.3(3)  | B(9A)-B(4A)-H(4A) | 121.4    |
| B(6A)-B(2A)-B(3A) | 103.1(5) | B(3A)-B(4A)-H(4A) | 131.0    |
| B(7A)-B(2A)-B(3A) | 60.1(4)  | B(5A)-B(4A)-H(4A) | 131.7    |
| B(5A)-B(2A)-B(3A) | 90.4(5)  | C(1A)-B(5A)-B(6A) | 109.7(6) |
| C(1A)-B(2A)-H(2A) | 122.1    | C(1A)-B(5A)-B(2A) | 56.9(4)  |
| B(6A)-B(2A)-H(2A) | 120.3    | B(6A)-B(5A)-B(2A) | 58.9(5)  |
| B(7A)-B(2A)-H(2A) | 120.3    | C(1A)-B(5A)-B(9A) | 108.8(5) |
| B(5A)-B(2A)-H(2A) | 130.6    | B(6A)-B(5A)-B(9A) | 60.3(5)  |
| B(3A)-B(2A)-H(2A) | 130.3    | B(2A)-B(5A)-B(9A) | 101.4(5) |
| C(1A)-B(3A)-B(7A) | 108.2(5) | C(1A)-B(5A)-B(4A) | 54.8(4)  |
| C(1A)-B(3A)-B(8A) | 108.0(5) | B(6A)-B(5A)-B(4A) | 102.2(5) |
| B(7A)-B(3A)-B(8A) | 60.0(4)  | B(2A)-B(5A)-B(4A) | 90.7(5)  |
| C(1A)-B(3A)-B(2A) | 55.6(4)  | B(9A)-B(5A)-B(4A) | 59.8(4)  |
| B(7A)-B(3A)-B(2A) | 58.9(4)  | C(1A)-B(5A)-H(5A) | 120.9    |
| B(8A)-B(3A)-B(2A) | 101.1(5) | B(6A)-B(5A)-H(5A) | 120.9    |
| C(1A)-B(3A)-B(4A) | 54.4(4)  | B(2A)-B(5A)-H(5A) | 130.6    |
| B(7A)-B(3A)-B(4A) | 101.8(5) | B(9A)-B(5A)-H(5A) | 121.3    |
| B(8A)-B(3A)-B(4A) | 59.9(4)  | B(4A)-B(5A)-H(5A) | 130.7    |

|                    |          |                     |          |
|--------------------|----------|---------------------|----------|
| B(10A)-B(6A)-B(2A) | 112.2(6) | B(10A)-B(8A)-B(9A)  | 56.7(5)  |
| B(10A)-B(6A)-B(5A) | 112.3(6) | B(3A)-B(8A)-B(9A)   | 102.0(5) |
| B(2A)-B(6A)-B(5A)  | 60.6(4)  | B(7A)-B(8A)-B(9A)   | 89.4(5)  |
| B(10A)-B(6A)-B(7A) | 56.8(5)  | B(4A)-B(8A)-B(9A)   | 60.2(4)  |
| B(2A)-B(6A)-B(7A)  | 60.1(4)  | B(10A)-B(8A)-H(8A)  | 118.4    |
| B(5A)-B(6A)-B(7A)  | 102.4(6) | B(3A)-B(8A)-H(8A)   | 120.1    |
| B(10A)-B(6A)-B(9A) | 56.5(5)  | B(7A)-B(8A)-H(8A)   | 131.2    |
| B(2A)-B(6A)-B(9A)  | 102.9(6) | B(4A)-B(8A)-H(8A)   | 119.9    |
| B(5A)-B(6A)-B(9A)  | 60.7(5)  | B(9A)-B(8A)-H(8A)   | 131.4    |
| B(7A)-B(6A)-B(9A)  | 89.9(5)  | B(10A)-B(9A)-B(6A)  | 57.9(5)  |
| B(10A)-B(6A)-H(6A) | 118.8    | B(10A)-B(9A)-B(5A)  | 112.1(6) |
| B(2A)-B(6A)-H(6A)  | 119.9    | B(6A)-B(9A)-B(5A)   | 59.0(4)  |
| B(5A)-B(6A)-H(6A)  | 119.8    | B(10A)-B(9A)-B(8A)  | 56.8(5)  |
| B(7A)-B(6A)-H(6A)  | 131.1    | B(6A)-B(9A)-B(8A)   | 89.9(5)  |
| B(9A)-B(6A)-H(6A)  | 130.8    | B(5A)-B(9A)-B(8A)   | 101.5(5) |
| B(10A)-B(7A)-B(2A) | 112.4(6) | B(10A)-B(9A)-B(4A)  | 112.0(6) |
| B(10A)-B(7A)-B(6A) | 58.2(5)  | B(6A)-B(9A)-B(4A)   | 101.8(5) |
| B(2A)-B(7A)-B(6A)  | 58.9(4)  | B(5A)-B(9A)-B(4A)   | 60.5(4)  |
| B(10A)-B(7A)-B(3A) | 112.4(6) | B(8A)-B(9A)-B(4A)   | 59.7(4)  |
| B(2A)-B(7A)-B(3A)  | 61.0(4)  | B(10A)-B(9A)-H(9A)  | 118.3    |
| B(6A)-B(7A)-B(3A)  | 102.1(5) | B(6A)-B(9A)-H(9A)   | 131.1    |
| B(10A)-B(7A)-B(8A) | 57.0(5)  | B(5A)-B(9A)-H(9A)   | 120.7    |
| B(2A)-B(7A)-B(8A)  | 102.6(5) | B(8A)-B(9A)-H(9A)   | 131.4    |
| B(6A)-B(7A)-B(8A)  | 90.8(5)  | B(4A)-B(9A)-H(9A)   | 120.3    |
| B(3A)-B(7A)-B(8A)  | 60.0(4)  | B(9A)-B(10A)-B(8A)  | 66.5(5)  |
| B(10A)-B(7A)-H(7A) | 118.1    | B(9A)-B(10A)-B(7A)  | 100.4(5) |
| B(2A)-B(7A)-H(7A)  | 120.3    | B(8A)-B(10A)-B(7A)  | 65.9(5)  |
| B(6A)-B(7A)-H(7A)  | 130.8    | B(9A)-B(10A)-B(6A)  | 65.6(5)  |
| B(3A)-B(7A)-H(7A)  | 120.1    | B(8A)-B(10A)-B(6A)  | 100.2(5) |
| B(8A)-B(7A)-H(7A)  | 130.7    | B(7A)-B(10A)-B(6A)  | 65.0(5)  |
| B(10A)-B(8A)-B(3A) | 112.4(5) | B(9A)-B(10A)-H(10A) | 129.5    |
| B(10A)-B(8A)-B(7A) | 57.1(5)  | B(8A)-B(10A)-H(10A) | 129.5    |
| B(3A)-B(8A)-B(7A)  | 59.9(4)  | B(7A)-B(10A)-H(10A) | 130.1    |
| B(10A)-B(8A)-B(4A) | 112.4(5) | B(6A)-B(10A)-H(10A) | 130.4    |
| B(3A)-B(8A)-B(4A)  | 60.6(4)  | N(3)-C(1B)-B(5B)    | 127.3(5) |
| B(7A)-B(8A)-B(4A)  | 102.2(5) | N(3)-C(1B)-B(4B)    | 124.9(5) |

|                   |          |                    |          |
|-------------------|----------|--------------------|----------|
| B(5B)-C(1B)-B(4B) | 70.5(4)  | B(4B)-B(3B)-H(3B)  | 130.5    |
| N(3)-C(1B)-B(3B)  | 124.6(4) | B(2B)-B(3B)-H(3B)  | 130.3    |
| B(5B)-C(1B)-B(3B) | 108.1(5) | C(1B)-B(4B)-B(8B)  | 108.3(5) |
| B(4B)-C(1B)-B(3B) | 69.5(4)  | C(1B)-B(4B)-B(9B)  | 107.6(6) |
| N(3)-C(1B)-B(2B)  | 126.3(5) | B(8B)-B(4B)-B(9B)  | 61.3(4)  |
| B(5B)-C(1B)-B(2B) | 70.4(4)  | C(1B)-B(4B)-B(3B)  | 55.3(4)  |
| B(4B)-C(1B)-B(2B) | 108.8(5) | B(8B)-B(4B)-B(3B)  | 59.1(4)  |
| B(3B)-C(1B)-B(2B) | 69.7(4)  | B(9B)-B(4B)-B(3B)  | 101.7(5) |
| C(1B)-B(2B)-B(7B) | 107.7(6) | C(1B)-B(4B)-B(5B)  | 54.2(4)  |
| C(1B)-B(2B)-B(6B) | 108.2(5) | B(8B)-B(4B)-B(5B)  | 101.8(5) |
| B(7B)-B(2B)-B(6B) | 60.8(5)  | B(9B)-B(4B)-B(5B)  | 59.1(4)  |
| C(1B)-B(2B)-B(3B) | 55.1(4)  | B(3B)-B(4B)-B(5B)  | 89.5(5)  |
| B(7B)-B(2B)-B(3B) | 59.0(4)  | C(1B)-B(4B)-H(4B)  | 122.3    |
| B(6B)-B(2B)-B(3B) | 102.1(5) | B(8B)-B(4B)-H(4B)  | 120.8    |
| C(1B)-B(2B)-B(5B) | 54.1(4)  | B(9B)-B(4B)-H(4B)  | 121.1    |
| B(7B)-B(2B)-B(5B) | 101.1(5) | B(3B)-B(4B)-H(4B)  | 131.0    |
| B(6B)-B(2B)-B(5B) | 59.7(4)  | B(5B)-B(4B)-H(4B)  | 131.4    |
| B(3B)-B(2B)-B(5B) | 89.2(5)  | C(1B)-B(5B)-B(9B)  | 109.3(5) |
| C(1B)-B(2B)-H(2B) | 122.3    | C(1B)-B(5B)-B(6B)  | 109.0(5) |
| B(7B)-B(2B)-H(2B) | 121.5    | B(9B)-B(5B)-B(6B)  | 61.3(5)  |
| B(6B)-B(2B)-H(2B) | 120.6    | C(1B)-B(5B)-B(4B)  | 55.3(4)  |
| B(3B)-B(2B)-H(2B) | 131.0    | B(9B)-B(5B)-B(4B)  | 59.8(4)  |
| B(5B)-B(2B)-H(2B) | 131.5    | B(6B)-B(5B)-B(4B)  | 102.7(5) |
| C(1B)-B(3B)-B(8B) | 108.7(5) | C(1B)-B(5B)-B(2B)  | 55.5(4)  |
| C(1B)-B(3B)-B(7B) | 108.4(5) | B(9B)-B(5B)-B(2B)  | 102.4(5) |
| B(8B)-B(3B)-B(7B) | 60.7(4)  | B(6B)-B(5B)-B(2B)  | 59.2(4)  |
| C(1B)-B(3B)-B(4B) | 55.2(4)  | B(4B)-B(5B)-B(2B)  | 90.5(5)  |
| B(8B)-B(3B)-B(4B) | 59.6(4)  | C(1B)-B(5B)-H(5B)  | 121.4    |
| B(7B)-B(3B)-B(4B) | 102.0(5) | B(9B)-B(5B)-H(5B)  | 120.4    |
| C(1B)-B(3B)-B(2B) | 55.2(4)  | B(6B)-B(5B)-H(5B)  | 120.6    |
| B(8B)-B(3B)-B(2B) | 102.6(5) | B(4B)-B(5B)-H(5B)  | 130.4    |
| B(7B)-B(3B)-B(2B) | 59.6(4)  | B(2B)-B(5B)-H(5B)  | 130.8    |
| B(4B)-B(3B)-B(2B) | 90.8(5)  | B(10B)-B(6B)-B(2B) | 111.6(6) |
| C(1B)-B(3B)-H(3B) | 121.9    | B(10B)-B(6B)-B(5B) | 110.3(6) |
| B(8B)-B(3B)-H(3B) | 120.7    | B(2B)-B(6B)-B(5B)  | 61.1(4)  |
| B(7B)-B(3B)-H(3B) | 121.1    | B(10B)-B(6B)-B(7B) | 56.8(5)  |

|                    |          |                     |           |
|--------------------|----------|---------------------|-----------|
| B(2B)-B(6B)-B(7B)  | 59.5(4)  | B(10B)-B(8B)-H(8B)  | 118.6     |
| B(5B)-B(6B)-B(7B)  | 101.1(5) | B(3B)-B(8B)-H(8B)   | 119.8     |
| B(10B)-B(6B)-B(9B) | 56.0(5)  | B(4B)-B(8B)-H(8B)   | 119.9     |
| B(2B)-B(6B)-B(9B)  | 102.1(5) | B(7B)-B(8B)-H(8B)   | 131.0     |
| B(5B)-B(6B)-B(9B)  | 59.1(4)  | B(9B)-B(8B)-H(8B)   | 131.5     |
| B(7B)-B(6B)-B(9B)  | 89.0(6)  | B(10B)-B(9B)-B(5B)  | 112.4(6)  |
| B(10B)-B(6B)-H(6B) | 119.4    | B(10B)-B(9B)-B(4B)  | 111.6(6)  |
| B(2B)-B(6B)-H(6B)  | 119.9    | B(5B)-B(9B)-B(4B)   | 61.0(4)   |
| B(5B)-B(6B)-H(6B)  | 121.0    | B(10B)-B(9B)-B(8B)  | 57.0(5)   |
| B(7B)-B(6B)-H(6B)  | 131.6    | B(5B)-B(9B)-B(8B)   | 101.4(5)  |
| B(9B)-B(6B)-H(6B)  | 131.6    | B(4B)-B(9B)-B(8B)   | 58.9(4)   |
| B(10B)-B(7B)-B(3B) | 112.3(6) | B(10B)-B(9B)-B(6B)  | 57.7(5)   |
| B(10B)-B(7B)-B(2B) | 112.7(6) | B(5B)-B(9B)-B(6B)   | 59.6(5)   |
| B(3B)-B(7B)-B(2B)  | 61.5(4)  | B(4B)-B(9B)-B(6B)   | 102.4(5)  |
| B(10B)-B(7B)-B(8B) | 57.5(5)  | B(8B)-B(9B)-B(6B)   | 90.0(5)   |
| B(3B)-B(7B)-B(8B)  | 59.6(4)  | B(10B)-B(9B)-H(9B)  | 118.3     |
| B(2B)-B(7B)-B(8B)  | 103.2(5) | B(5B)-B(9B)-H(9B)   | 120.2     |
| B(10B)-B(7B)-B(6B) | 57.8(5)  | B(4B)-B(9B)-H(9B)   | 120.4     |
| B(3B)-B(7B)-B(6B)  | 103.0(5) | B(8B)-B(9B)-H(9B)   | 131.7     |
| B(2B)-B(7B)-B(6B)  | 59.6(4)  | B(6B)-B(9B)-H(9B)   | 130.7     |
| B(8B)-B(7B)-B(6B)  | 91.5(5)  | B(9B)-B(10B)-B(7B)  | 100.3(6)  |
| B(10B)-B(7B)-H(7B) | 118.2    | B(9B)-B(10B)-B(8B)  | 66.7(5)   |
| B(3B)-B(7B)-H(7B)  | 120.0    | B(7B)-B(10B)-B(8B)  | 65.1(5)   |
| B(2B)-B(7B)-H(7B)  | 119.7    | B(9B)-B(10B)-B(6B)  | 66.3(5)   |
| B(8B)-B(7B)-H(7B)  | 130.4    | B(7B)-B(10B)-B(6B)  | 65.4(5)   |
| B(6B)-B(7B)-H(7B)  | 130.3    | B(8B)-B(10B)-B(6B)  | 100.7(6)  |
| B(10B)-B(8B)-B(3B) | 112.5(6) | B(9B)-B(10B)-H(10B) | 129.3     |
| B(10B)-B(8B)-B(4B) | 112.0(6) | B(7B)-B(10B)-H(10B) | 130.5     |
| B(3B)-B(8B)-B(4B)  | 61.3(4)  | B(8B)-B(10B)-H(10B) | 129.6     |
| B(10B)-B(8B)-B(7B) | 57.5(5)  | B(6B)-B(10B)-H(10B) | 129.7     |
| B(3B)-B(8B)-B(7B)  | 59.7(4)  | O(1T)-Li(1)-O(2T)   | 114.0(13) |
| B(4B)-B(8B)-B(7B)  | 102.6(5) | O(2U)-Li(1)-O(1U)   | 116.7(8)  |
| B(10B)-B(8B)-B(9B) | 56.3(5)  | O(1T)-Li(1)-C(2)    | 119.1(8)  |
| B(3B)-B(8B)-B(9B)  | 102.3(5) | O(2U)-Li(1)-C(2)    | 122.3(6)  |
| B(4B)-B(8B)-B(9B)  | 59.9(4)  | O(2T)-Li(1)-C(2)    | 125.8(11) |
| B(7B)-B(8B)-B(9B)  | 89.6(6)  | O(1U)-Li(1)-C(2)    | 121.0(6)  |



|                      |           |                   |           |
|----------------------|-----------|-------------------|-----------|
| O(3T)-Li(2)-C(4)#1   | 136.1(5)  | C(4T)-C(3T)-H(3D) | 111.6     |
| O(3T)-Li(2)-C(4)     | 112.8(5)  | H(3C)-C(3T)-H(3D) | 109.4     |
| C(4)#1-Li(2)-C(4)    | 111.1(4)  | O(1T)-C(4T)-C(3T) | 104.2(7)  |
| O(3T)-Li(2)-Li(2)#1  | 167.4(7)  | O(1T)-C(4T)-H(4C) | 110.9     |
| C(4)#1-Li(2)-Li(2)#1 | 56.4(4)   | C(3T)-C(4T)-H(4C) | 110.9     |
| C(4)-Li(2)-Li(2)#1   | 54.8(4)   | O(1T)-C(4T)-H(4D) | 110.9     |
| O(6T)-Li(4)-O(7T)    | 108.4(12) | C(3T)-C(4T)-H(4D) | 110.9     |
| O(7U)-Li(4)-O(6U)    | 105.9(12) | H(4C)-C(4T)-H(4D) | 108.9     |
| O(6T)-Li(4)-O(4T)    | 106.5(8)  | C(1U)-O(1U)-C(4U) | 108.6(5)  |
| O(7T)-Li(4)-O(4T)    | 111.7(6)  | C(1U)-O(1U)-Li(1) | 132.9(11) |
| O(7U)-Li(4)-O(4T)    | 112.8(9)  | C(4U)-O(1U)-Li(1) | 113.8(10) |
| O(6U)-Li(4)-O(4T)    | 108.6(7)  | O(1U)-C(1U)-C(2U) | 107.4(5)  |
| O(6T)-Li(4)-O(5T)    | 114.8(10) | O(1U)-C(1U)-H(1C) | 110.2     |
| O(7T)-Li(4)-O(5T)    | 105.1(6)  | C(2U)-C(1U)-H(1C) | 110.2     |
| O(7U)-Li(4)-O(5T)    | 110.4(9)  | O(1U)-C(1U)-H(1D) | 110.2     |
| O(6U)-Li(4)-O(5T)    | 108.5(8)  | C(2U)-C(1U)-H(1D) | 110.2     |
| O(4T)-Li(4)-O(5T)    | 110.4(7)  | H(1C)-C(1U)-H(1D) | 108.5     |
| C(1T)-O(1T)-C(4T)    | 109.7(6)  | C(1U)-C(2U)-C(3U) | 103.4(6)  |
| C(1T)-O(1T)-Li(1)    | 120.6(14) | C(1U)-C(2U)-H(2E) | 111.1     |
| C(4T)-O(1T)-Li(1)    | 125.1(14) | C(3U)-C(2U)-H(2E) | 111.1     |
| O(1T)-C(1T)-C(2T)    | 106.8(6)  | C(1U)-C(2U)-H(2F) | 111.1     |
| O(1T)-C(1T)-H(1A)    | 110.4     | C(3U)-C(2U)-H(2F) | 111.1     |
| C(2T)-C(1T)-H(1A)    | 110.4     | H(2E)-C(2U)-H(2F) | 109.0     |
| O(1T)-C(1T)-H(1B)    | 110.4     | C(4U)-C(3U)-C(2U) | 101.3(6)  |
| C(2T)-C(1T)-H(1B)    | 110.4     | C(4U)-C(3U)-H(3E) | 111.5     |
| H(1A)-C(1T)-H(1B)    | 108.6     | C(2U)-C(3U)-H(3E) | 111.5     |
| C(1T)-C(2T)-C(3T)    | 103.2(7)  | C(4U)-C(3U)-H(3F) | 111.5     |
| C(1T)-C(2T)-H(2C)    | 111.1     | C(2U)-C(3U)-H(3F) | 111.5     |
| C(3T)-C(2T)-H(2C)    | 111.1     | H(3E)-C(3U)-H(3F) | 109.3     |
| C(1T)-C(2T)-H(2D)    | 111.1     | O(1U)-C(4U)-C(3U) | 104.3(6)  |
| C(3T)-C(2T)-H(2D)    | 111.1     | O(1U)-C(4U)-H(4E) | 110.9     |
| H(2C)-C(2T)-H(2D)    | 109.1     | C(3U)-C(4U)-H(4E) | 110.9     |
| C(2T)-C(3T)-C(4T)    | 101.0(8)  | O(1U)-C(4U)-H(4F) | 110.9     |
| C(2T)-C(3T)-H(3C)    | 111.6     | C(3U)-C(4U)-H(4F) | 110.9     |
| C(4T)-C(3T)-H(3C)    | 111.6     | H(4E)-C(4U)-H(4F) | 108.9     |
| C(2T)-C(3T)-H(3D)    | 111.6     | C(5T)-O(2T)-C(8T) | 107.9(8)  |

|                   |           |                      |          |
|-------------------|-----------|----------------------|----------|
| C(5T)-O(2T)-Li(1) | 102(2)    | C(5U)-C(6U)-H(6E)    | 111.8    |
| C(8T)-O(2T)-Li(1) | 146(2)    | C(7U)-C(6U)-H(6E)    | 111.8    |
| O(2T)-C(5T)-C(6T) | 108.1(6)  | C(5U)-C(6U)-H(6F)    | 111.8    |
| O(2T)-C(5T)-H(5C) | 110.1     | C(7U)-C(6U)-H(6F)    | 111.8    |
| C(6T)-C(5T)-H(5C) | 110.1     | H(6E)-C(6U)-H(6F)    | 109.5    |
| O(2T)-C(5T)-H(5D) | 110.1     | C(8U)-C(7U)-C(6U)    | 101.5(8) |
| C(6T)-C(5T)-H(5D) | 110.1     | C(8U)-C(7U)-H(7E)    | 111.5    |
| H(5C)-C(5T)-H(5D) | 108.4     | C(6U)-C(7U)-H(7E)    | 111.5    |
| C(5T)-C(6T)-C(7T) | 104.4(7)  | C(8U)-C(7U)-H(7F)    | 111.5    |
| C(5T)-C(6T)-H(6C) | 110.9     | C(6U)-C(7U)-H(7F)    | 111.5    |
| C(7T)-C(6T)-H(6C) | 110.9     | H(7E)-C(7U)-H(7F)    | 109.3    |
| C(5T)-C(6T)-H(6D) | 110.9     | O(2U)-C(8U)-C(7U)    | 105.7(6) |
| C(7T)-C(6T)-H(6D) | 110.9     | O(2U)-C(8U)-H(8E)    | 110.6    |
| H(6C)-C(6T)-H(6D) | 108.9     | C(7U)-C(8U)-H(8E)    | 110.6    |
| C(6T)-C(7T)-C(8T) | 101.7(9)  | O(2U)-C(8U)-H(8F)    | 110.6    |
| C(6T)-C(7T)-H(7C) | 111.4     | C(7U)-C(8U)-H(8F)    | 110.6    |
| C(8T)-C(7T)-H(7C) | 111.4     | H(8E)-C(8U)-H(8F)    | 108.7    |
| C(6T)-C(7T)-H(7D) | 111.4     | C(12T)-O(3T)-C(9T)   | 108.9(5) |
| C(8T)-C(7T)-H(7D) | 111.4     | C(12T)-O(3T)-Li(2)   | 123.2(5) |
| H(7C)-C(7T)-H(7D) | 109.3     | C(9T)-O(3T)-Li(2)    | 114.7(5) |
| O(2T)-C(8T)-C(7T) | 103.3(9)  | O(3T)-C(9T)-C(10T)   | 107.0(6) |
| O(2T)-C(8T)-H(8C) | 111.1     | O(3T)-C(9T)-H(9C)    | 110.3    |
| C(7T)-C(8T)-H(8C) | 111.1     | C(10T)-C(9T)-H(9C)   | 110.3    |
| O(2T)-C(8T)-H(8D) | 111.1     | O(3T)-C(9T)-H(9D)    | 110.3    |
| C(7T)-C(8T)-H(8D) | 111.1     | C(10T)-C(9T)-H(9D)   | 110.3    |
| H(8C)-C(8T)-H(8D) | 109.1     | H(9C)-C(9T)-H(9D)    | 108.6    |
| C(8U)-O(2U)-C(5U) | 109.7(5)  | C(11T)-C(10T)-C(9T)  | 103.7(6) |
| C(8U)-O(2U)-Li(1) | 122.6(13) | C(11T)-C(10T)-H(10C) | 111.0    |
| C(5U)-O(2U)-Li(1) | 123.7(11) | C(9T)-C(10T)-H(10C)  | 111.0    |
| O(2U)-C(5U)-C(6U) | 104.6(7)  | C(11T)-C(10T)-H(10D) | 111.0    |
| O(2U)-C(5U)-H(5E) | 110.8     | C(9T)-C(10T)-H(10D)  | 111.0    |
| C(6U)-C(5U)-H(5E) | 110.8     | H(10C)-C(10T)-H(10D) | 109.0    |
| O(2U)-C(5U)-H(5F) | 110.8     | C(10T)-C(11T)-C(12T) | 103.9(6) |
| C(6U)-C(5U)-H(5F) | 110.8     | C(10T)-C(11T)-H(11A) | 111.0    |
| H(5E)-C(5U)-H(5F) | 108.9     | C(12T)-C(11T)-H(11A) | 111.0    |
| C(5U)-C(6U)-C(7U) | 99.8(8)   | C(10T)-C(11T)-H(11B) | 111.0    |

|                      |           |                      |           |
|----------------------|-----------|----------------------|-----------|
| C(12T)-C(11T)-H(11B) | 111.0     | C(14T)-C(15U)-H(15C) | 110.6     |
| H(11A)-C(11T)-H(11B) | 109.0     | C(16T)-C(15U)-H(15C) | 110.6     |
| O(3T)-C(12T)-C(11T)  | 103.0(5)  | C(14T)-C(15U)-H(15D) | 110.6     |
| O(3T)-C(12T)-H(12A)  | 111.2     | C(16T)-C(15U)-H(15D) | 110.6     |
| C(11T)-C(12T)-H(12A) | 111.2     | H(15C)-C(15U)-H(15D) | 108.8     |
| O(3T)-C(12T)-H(12B)  | 111.2     | O(4T)-C(16T)-C(15T)  | 107.7(9)  |
| C(11T)-C(12T)-H(12B) | 111.2     | O(4T)-C(16T)-C(15U)  | 104.1(10) |
| H(12A)-C(12T)-H(12B) | 109.1     | O(4T)-C(16T)-H(16A)  | 110.2     |
| C(16T)-O(4T)-C(13T)  | 108.0(6)  | C(15T)-C(16T)-H(16A) | 110.2     |
| C(16T)-O(4T)-Li(4)   | 126.5(6)  | O(4T)-C(16T)-H(16B)  | 110.2     |
| C(13T)-O(4T)-Li(4)   | 124.6(6)  | C(15T)-C(16T)-H(16B) | 110.2     |
| C(14T)-C(13T)-O(4T)  | 107.9(7)  | H(16A)-C(16T)-H(16B) | 108.5     |
| C(14T)-C(13T)-H(13A) | 110.1     | O(4T)-C(16T)-H(16C)  | 110.9     |
| O(4T)-C(13T)-H(13A)  | 110.1     | C(15U)-C(16T)-H(16C) | 110.9     |
| C(14T)-C(13T)-H(13B) | 110.1     | O(4T)-C(16T)-H(16D)  | 110.9     |
| O(4T)-C(13T)-H(13B)  | 110.1     | C(15U)-C(16T)-H(16D) | 110.9     |
| H(13A)-C(13T)-H(13B) | 108.4     | H(16C)-C(16T)-H(16D) | 109.0     |
| C(13T)-C(14T)-C(15U) | 103.5(10) | C(17U)-O(5T)-C(20U)  | 109.0(7)  |
| C(13T)-C(14T)-C(15T) | 106.3(10) | C(17T)-O(5T)-C(20T)  | 107.2(5)  |
| C(13T)-C(14T)-H(14A) | 110.5     | C(17U)-O(5T)-Li(4)   | 123.9(8)  |
| C(15T)-C(14T)-H(14A) | 110.5     | C(17T)-O(5T)-Li(4)   | 126.0(5)  |
| C(13T)-C(14T)-H(14B) | 110.5     | C(20U)-O(5T)-Li(4)   | 126.0(8)  |
| C(15T)-C(14T)-H(14B) | 110.5     | C(20T)-O(5T)-Li(4)   | 124.5(5)  |
| H(14A)-C(14T)-H(14B) | 108.7     | O(5T)-C(17T)-C(18T)  | 107.4(5)  |
| C(13T)-C(14T)-H(14C) | 111.1     | O(5T)-C(17T)-H(17A)  | 110.2     |
| C(15U)-C(14T)-H(14C) | 111.1     | C(18T)-C(17T)-H(17A) | 110.2     |
| C(13T)-C(14T)-H(14D) | 111.1     | O(5T)-C(17T)-H(17B)  | 110.2     |
| C(15U)-C(14T)-H(14D) | 111.1     | C(18T)-C(17T)-H(17B) | 110.2     |
| H(14C)-C(14T)-H(14D) | 109.0     | H(17A)-C(17T)-H(17B) | 108.5     |
| C(14T)-C(15T)-C(16T) | 104.9(10) | C(19T)-C(18T)-C(17T) | 106.5(5)  |
| C(14T)-C(15T)-H(15A) | 110.8     | C(19T)-C(18T)-H(18A) | 110.4     |
| C(16T)-C(15T)-H(15A) | 110.8     | C(17T)-C(18T)-H(18A) | 110.4     |
| C(14T)-C(15T)-H(15B) | 110.8     | C(19T)-C(18T)-H(18B) | 110.4     |
| C(16T)-C(15T)-H(15B) | 110.8     | C(17T)-C(18T)-H(18B) | 110.4     |
| H(15A)-C(15T)-H(15B) | 108.8     | H(18A)-C(18T)-H(18B) | 108.6     |
| C(14T)-C(15U)-C(16T) | 105.5(9)  | C(18T)-C(19T)-C(20T) | 105.7(5)  |

|                      |          |                      |           |
|----------------------|----------|----------------------|-----------|
| C(18T)-C(19T)-H(19A) | 110.6    | C(24T)-O(6T)-Li(4)   | 138.4(15) |
| C(20T)-C(19T)-H(19A) | 110.6    | C(21T)-O(6T)-Li(4)   | 107.3(12) |
| C(18T)-C(19T)-H(19B) | 110.6    | O(6T)-C(21T)-C(22T)  | 106.4(7)  |
| C(20T)-C(19T)-H(19B) | 110.6    | O(6T)-C(21T)-H(21A)  | 110.5     |
| H(19A)-C(19T)-H(19B) | 108.7    | C(22T)-C(21T)-H(21A) | 110.5     |
| O(5T)-C(20T)-C(19T)  | 104.7(6) | O(6T)-C(21T)-H(21B)  | 110.5     |
| O(5T)-C(20T)-H(20A)  | 110.8    | C(22T)-C(21T)-H(21B) | 110.5     |
| C(19T)-C(20T)-H(20A) | 110.8    | H(21A)-C(21T)-H(21B) | 108.6     |
| O(5T)-C(20T)-H(20B)  | 110.8    | C(21T)-C(22T)-C(23T) | 103.6(7)  |
| C(19T)-C(20T)-H(20B) | 110.8    | C(21T)-C(22T)-H(22A) | 111.1     |
| H(20A)-C(20T)-H(20B) | 108.9    | C(23T)-C(22T)-H(22A) | 111.1     |
| O(5T)-C(17U)-C(18U)  | 107.2(6) | C(21T)-C(22T)-H(22B) | 111.1     |
| O(5T)-C(17U)-H(17C)  | 110.3    | C(23T)-C(22T)-H(22B) | 111.1     |
| C(18U)-C(17U)-H(17C) | 110.3    | H(22A)-C(22T)-H(22B) | 109.0     |
| O(5T)-C(17U)-H(17D)  | 110.3    | C(24T)-C(23T)-C(22T) | 103.7(7)  |
| C(18U)-C(17U)-H(17D) | 110.3    | C(24T)-C(23T)-H(23A) | 111.0     |
| H(17C)-C(17U)-H(17D) | 108.5    | C(22T)-C(23T)-H(23A) | 111.0     |
| C(17U)-C(18U)-C(19U) | 104.3(7) | C(24T)-C(23T)-H(23B) | 111.0     |
| C(17U)-C(18U)-H(18C) | 110.9    | C(22T)-C(23T)-H(23B) | 111.0     |
| C(19U)-C(18U)-H(18C) | 110.9    | H(23A)-C(23T)-H(23B) | 109.0     |
| C(17U)-C(18U)-H(18D) | 110.9    | O(6T)-C(24T)-C(23T)  | 107.9(6)  |
| C(19U)-C(18U)-H(18D) | 110.9    | O(6T)-C(24T)-H(24A)  | 110.1     |
| H(18C)-C(18U)-H(18D) | 108.9    | C(23T)-C(24T)-H(24A) | 110.1     |
| C(18U)-C(19U)-C(20U) | 101.4(8) | O(6T)-C(24T)-H(24B)  | 110.1     |
| C(18U)-C(19U)-H(19C) | 111.5    | C(23T)-C(24T)-H(24B) | 110.1     |
| C(20U)-C(19U)-H(19C) | 111.5    | H(24A)-C(24T)-H(24B) | 108.4     |
| C(18U)-C(19U)-H(19D) | 111.5    | C(24U)-O(6U)-C(21U)  | 107.4(6)  |
| C(20U)-C(19U)-H(19D) | 111.5    | C(24U)-O(6U)-Li(4)   | 116.0(10) |
| H(19C)-C(19U)-H(19D) | 109.3    | C(21U)-O(6U)-Li(4)   | 135.7(10) |
| O(5T)-C(20U)-C(19U)  | 103.5(8) | O(6U)-C(21U)-C(22U)  | 102.9(7)  |
| O(5T)-C(20U)-H(20C)  | 111.1    | O(6U)-C(21U)-H(21C)  | 111.2     |
| C(19U)-C(20U)-H(20C) | 111.1    | C(22U)-C(21U)-H(21C) | 111.2     |
| O(5T)-C(20U)-H(20D)  | 111.1    | O(6U)-C(21U)-H(21D)  | 111.2     |
| C(19U)-C(20U)-H(20D) | 111.1    | C(22U)-C(21U)-H(21D) | 111.2     |
| H(20C)-C(20U)-H(20D) | 109.0    | H(21C)-C(21U)-H(21D) | 109.1     |
| C(24T)-O(6T)-C(21T)  | 110.2(6) | C(23U)-C(22U)-C(21U) | 102.8(7)  |

|                      |          |                      |           |
|----------------------|----------|----------------------|-----------|
| C(23U)-C(22U)-H(22C) | 111.2    | C(28T)-C(27T)-H(27B) | 111.1     |
| C(21U)-C(22U)-H(22C) | 111.2    | H(27A)-C(27T)-H(27B) | 109.1     |
| C(23U)-C(22U)-H(22D) | 111.2    | O(7T)-C(28T)-C(27T)  | 106.0(6)  |
| C(21U)-C(22U)-H(22D) | 111.2    | O(7T)-C(28T)-H(28A)  | 110.5     |
| H(22C)-C(22U)-H(22D) | 109.1    | C(27T)-C(28T)-H(28A) | 110.5     |
| C(22U)-C(23U)-C(24U) | 104.2(6) | O(7T)-C(28T)-H(28B)  | 110.5     |
| C(22U)-C(23U)-H(23C) | 110.9    | C(27T)-C(28T)-H(28B) | 110.5     |
| C(24U)-C(23U)-H(23C) | 110.9    | H(28A)-C(28T)-H(28B) | 108.7     |
| C(22U)-C(23U)-H(23D) | 110.9    | C(25U)-O(7U)-C(28U)  | 109.5(6)  |
| C(24U)-C(23U)-H(23D) | 110.9    | C(25U)-O(7U)-Li(4)   | 127.2(13) |
| H(23C)-C(23U)-H(23D) | 108.9    | C(28U)-O(7U)-Li(4)   | 123.2(13) |
| O(6U)-C(24U)-C(23U)  | 107.9(6) | O(7U)-C(25U)-C(26U)  | 106.4(7)  |
| O(6U)-C(24U)-H(24C)  | 110.1    | O(7U)-C(25U)-H(25C)  | 110.4     |
| C(23U)-C(24U)-H(24C) | 110.1    | C(26U)-C(25U)-H(25C) | 110.4     |
| O(6U)-C(24U)-H(24D)  | 110.1    | O(7U)-C(25U)-H(25D)  | 110.4     |
| C(23U)-C(24U)-H(24D) | 110.1    | C(26U)-C(25U)-H(25D) | 110.4     |
| H(24C)-C(24U)-H(24D) | 108.4    | H(25C)-C(25U)-H(25D) | 108.6     |
| C(25T)-O(7T)-C(28T)  | 110.2(5) | C(25U)-C(26U)-C(27U) | 101.2(8)  |
| C(25T)-O(7T)-Li(4)   | 127.6(9) | C(25U)-C(26U)-H(26C) | 111.5     |
| C(28T)-O(7T)-Li(4)   | 118.5(9) | C(27U)-C(26U)-H(26C) | 111.5     |
| O(7T)-C(25T)-C(26T)  | 107.0(6) | C(25U)-C(26U)-H(26D) | 111.5     |
| O(7T)-C(25T)-H(25A)  | 110.3    | C(27U)-C(26U)-H(26D) | 111.5     |
| C(26T)-C(25T)-H(25A) | 110.3    | H(26C)-C(26U)-H(26D) | 109.4     |
| O(7T)-C(25T)-H(25B)  | 110.3    | C(28U)-C(27U)-C(26U) | 100.3(8)  |
| C(26T)-C(25T)-H(25B) | 110.3    | C(28U)-C(27U)-H(27C) | 111.7     |
| H(25A)-C(25T)-H(25B) | 108.6    | C(26U)-C(27U)-H(27C) | 111.7     |
| C(27T)-C(26T)-C(25T) | 104.0(7) | C(28U)-C(27U)-H(27D) | 111.7     |
| C(27T)-C(26T)-H(26A) | 111.0    | C(26U)-C(27U)-H(27D) | 111.7     |
| C(25T)-C(26T)-H(26A) | 111.0    | H(27C)-C(27U)-H(27D) | 109.5     |
| C(27T)-C(26T)-H(26B) | 111.0    | O(7U)-C(28U)-C(27U)  | 104.9(7)  |
| C(25T)-C(26T)-H(26B) | 111.0    | O(7U)-C(28U)-H(28C)  | 110.8     |
| H(26A)-C(26T)-H(26B) | 109.0    | C(27U)-C(28U)-H(28C) | 110.8     |
| C(26T)-C(27T)-C(28T) | 103.2(7) | O(7U)-C(28U)-H(28D)  | 110.8     |
| C(26T)-C(27T)-H(27A) | 111.1    | C(27U)-C(28U)-H(28D) | 110.8     |
| C(28T)-C(27T)-H(27A) | 111.1    | H(28C)-C(28U)-H(28D) | 108.8     |
| C(26T)-C(27T)-H(27B) | 111.1    | C(4S)-O(1S)-C(1S)    | 102.6(13) |

|                   |           |                   |           |
|-------------------|-----------|-------------------|-----------|
| C(2S)-C(1S)-O(1S) | 105.7(14) | C(2S)-C(3S)-C(4S) | 105.4(14) |
| C(2S)-C(1S)-H(1E) | 110.6     | C(2S)-C(3S)-H(3G) | 110.7     |
| O(1S)-C(1S)-H(1E) | 110.6     | C(4S)-C(3S)-H(3G) | 110.7     |
| C(2S)-C(1S)-H(1F) | 110.6     | C(2S)-C(3S)-H(3H) | 110.7     |
| O(1S)-C(1S)-H(1F) | 110.6     | C(4S)-C(3S)-H(3H) | 110.7     |
| H(1E)-C(1S)-H(1F) | 108.7     | H(3G)-C(3S)-H(3H) | 108.8     |
| C(3S)-C(2S)-C(1S) | 104.1(15) | O(1S)-C(4S)-C(3S) | 112.9(14) |
| C(3S)-C(2S)-H(2G) | 110.9     | O(1S)-C(4S)-H(4G) | 109.0     |
| C(1S)-C(2S)-H(2G) | 110.9     | C(3S)-C(4S)-H(4G) | 109.0     |
| C(3S)-C(2S)-H(2H) | 110.9     | O(1S)-C(4S)-H(4H) | 109.0     |
| C(1S)-C(2S)-H(2H) | 110.9     | C(3S)-C(4S)-H(4H) | 109.0     |
| H(2G)-C(2S)-H(2H) | 109.0     | H(4G)-C(4S)-H(4H) | 107.8     |

---

Symmetry transformations used to generate equivalent atoms:

#1 -x+1,-y+1,-z

**Table S10.** Anisotropic displacement parameters ( $\text{\AA}^2 \times 10^3$ ) for vL275SL\_0m-5. The anisotropic displacement factor exponent takes the form:  $-2p^2 [ h^2 a^{*2} U^{11} + \dots + 2 h k a^* b^* U^{12} ]$

|        | U11     | U22    | U33     | U23    | U13   | U12    |
|--------|---------|--------|---------|--------|-------|--------|
| N(1)   | 66(3)   | 42(3)  | 55(3)   | 20(3)  | 18(3) | 19(3)  |
| C(2)   | 62(4)   | 38(4)  | 69(5)   | 24(3)  | 25(4) | 20(3)  |
| N(3)   | 56(3)   | 43(3)  | 59(3)   | 21(3)  | 17(3) | 23(3)  |
| C(4)   | 60(4)   | 48(4)  | 59(4)   | 24(4)  | 17(3) | 23(3)  |
| C(5)   | 72(4)   | 46(4)  | 58(4)   | 27(3)  | 20(3) | 25(3)  |
| C(1A)  | 70(4)   | 40(4)  | 50(4)   | 12(3)  | 13(3) | 15(3)  |
| B(2A)  | 70(5)   | 51(4)  | 96(6)   | 19(4)  | 35(5) | 10(4)  |
| B(3A)  | 88(5)   | 42(4)  | 64(5)   | 26(4)  | 28(4) | 16(4)  |
| B(4A)  | 93(6)   | 56(4)  | 66(5)   | 22(4)  | 42(4) | 20(4)  |
| B(5A)  | 93(6)   | 46(4)  | 83(6)   | 19(4)  | 5(5)  | 10(4)  |
| B(6A)  | 86(6)   | 60(5)  | 111(7)  | 23(5)  | 3(5)  | 10(4)  |
| B(7A)  | 104(6)  | 49(4)  | 82(6)   | 22(4)  | 35(5) | -1(4)  |
| B(8A)  | 96(6)   | 42(4)  | 73(5)   | 25(4)  | 31(5) | 18(4)  |
| B(9A)  | 134(7)  | 52(5)  | 52(5)   | 12(4)  | 10(5) | 6(5)   |
| B(10A) | 114(7)  | 49(5)  | 88(6)   | 15(4)  | 20(5) | 5(5)   |
| C(1B)  | 52(4)   | 50(3)  | 55(4)   | 23(3)  | 11(3) | 17(3)  |
| B(2B)  | 81(5)   | 80(5)  | 71(5)   | 40(4)  | 23(4) | 26(4)  |
| B(3B)  | 67(5)   | 53(4)  | 57(4)   | 16(4)  | 16(4) | 16(4)  |
| B(4B)  | 65(5)   | 72(5)  | 78(5)   | 32(4)  | 17(4) | 15(4)  |
| B(5B)  | 80(5)   | 71(5)  | 72(5)   | 33(4)  | 14(4) | 32(4)  |
| B(6B)  | 102(7)  | 114(7) | 73(6)   | 52(5)  | 20(5) | 34(6)  |
| B(7B)  | 86(6)   | 86(6)  | 59(5)   | 15(4)  | 15(4) | 26(5)  |
| B(8B)  | 82(5)   | 82(5)  | 68(5)   | 22(4)  | 10(5) | 11(4)  |
| B(9B)  | 70(5)   | 118(7) | 84(6)   | 44(6)  | 9(5)  | 32(5)  |
| B(10B) | 87(6)   | 114(7) | 69(6)   | 32(5)  | 9(5)  | 20(5)  |
| Li(1)  | 95(8)   | 83(7)  | 87(8)   | 54(7)  | 28(6) | 27(6)  |
| Li(2)  | 67(6)   | 58(6)  | 95(8)   | 36(6)  | 32(6) | 25(5)  |
| Li(4)  | 97(9)   | 84(8)  | 106(9)  | 38(7)  | 34(7) | 20(7)  |
| O(1T)  | 115(6)  | 87(6)  | 100(6)  | 58(5)  | 33(5) | 63(5)  |
| C(1T)  | 145(14) | 93(14) | 120(10) | 65(11) | 13(9) | 54(12) |

|        |         |         |         |         |        |        |
|--------|---------|---------|---------|---------|--------|--------|
| C(2T)  | 114(14) | 145(16) | 181(15) | 64(14)  | 11(11) | 69(12) |
| C(3T)  | 112(15) | 164(14) | 154(12) | 82(13)  | 56(11) | 91(11) |
| C(4T)  | 110(14) | 119(15) | 101(10) | 44(12)  | 44(9)  | 74(12) |
| O(1U)  | 115(6)  | 87(6)   | 100(6)  | 58(5)   | 33(5)  | 63(5)  |
| C(1U)  | 153(11) | 83(10)  | 119(9)  | 60(7)   | 46(8)  | 69(8)  |
| C(2U)  | 161(12) | 105(9)  | 114(11) | 58(8)   | 47(9)  | 82(9)  |
| C(3U)  | 104(11) | 142(10) | 120(8)  | 74(7)   | 51(8)  | 71(9)  |
| C(4U)  | 141(11) | 107(9)  | 152(12) | 85(8)   | 68(9)  | 53(9)  |
| O(2T)  | 138(12) | 121(14) | 97(11)  | 69(11)  | 36(10) | 7(12)  |
| C(5T)  | 149(15) | 122(14) | 98(9)   | 68(11)  | 52(10) | 32(13) |
| C(6T)  | 180(13) | 125(14) | 91(12)  | 76(11)  | 52(9)  | 39(11) |
| C(7T)  | 202(16) | 151(15) | 96(9)   | 93(11)  | 51(9)  | 65(13) |
| C(8T)  | 184(15) | 161(15) | 102(12) | 83(12)  | 48(11) | 49(12) |
| O(2U)  | 116(8)  | 101(8)  | 82(6)   | 62(7)   | 34(6)  | 55(7)  |
| C(5U)  | 112(7)  | 114(10) | 101(8)  | 74(8)   | 75(7)  | 45(8)  |
| C(6U)  | 188(13) | 159(13) | 108(12) | 54(11)  | 80(11) | 44(11) |
| C(7U)  | 217(14) | 201(15) | 95(8)   | 87(11)  | 67(8)  | 40(14) |
| C(8U)  | 167(11) | 170(12) | 99(9)   | 103(9)  | 33(7)  | 23(10) |
| O(3T)  | 66(3)   | 79(3)   | 87(3)   | 37(3)   | 29(2)  | 21(2)  |
| C(9T)  | 73(5)   | 104(5)  | 103(5)  | 47(4)   | 19(4)  | 12(4)  |
| C(10T) | 103(5)  | 76(4)   | 115(5)  | 36(4)   | 38(4)  | 31(4)  |
| C(11T) | 97(5)   | 95(5)   | 129(6)  | 63(5)   | 40(4)  | 37(4)  |
| C(12T) | 73(4)   | 100(5)  | 92(5)   | 45(4)   | 31(4)  | 29(4)  |
| O(4T)  | 100(4)  | 131(4)  | 87(3)   | 46(3)   | 32(3)  | 42(3)  |
| C(13T) | 116(6)  | 134(6)  | 99(6)   | 57(5)   | 45(5)  | 45(5)  |
| C(14T) | 119(7)  | 176(9)  | 104(5)  | 57(6)   | 29(5)  | 51(6)  |
| C(15T) | 140(9)  | 126(13) | 102(6)  | 22(7)   | 6(6)   | 71(9)  |
| C(15U) | 140(9)  | 126(13) | 102(6)  | 22(7)   | 6(6)   | 71(9)  |
| C(16T) | 114(6)  | 159(8)  | 108(5)  | 41(6)   | 26(5)  | 62(6)  |
| O(5T)  | 83(3)   | 106(4)  | 128(4)  | 42(3)   | 32(3)  | 18(3)  |
| C(17T) | 100(8)  | 134(8)  | 186(12) | 102(8)  | 32(8)  | 33(6)  |
| C(18T) | 94(7)   | 120(9)  | 139(10) | 68(8)   | 26(7)  | 42(6)  |
| C(19T) | 108(8)  | 94(9)   | 224(14) | 57(9)   | 60(9)  | 33(7)  |
| C(20T) | 112(8)  | 108(8)  | 186(11) | 71(8)   | 58(8)  | 54(6)  |
| C(17U) | 76(10)  | 147(14) | 157(10) | 66(13)  | 58(8)  | 37(11) |
| C(18U) | 83(9)   | 106(15) | 187(15) | 106(13) | 44(10) | 43(11) |



|        |         |         |         |         |         |        |
|--------|---------|---------|---------|---------|---------|--------|
| C(19U) | 99(10)  | 129(18) | 155(14) | 49(15)  | 39(11)  | 33(13) |
| C(20U) | 124(13) | 186(18) | 161(11) | 12(16)  | 27(9)   | 45(14) |
| O(6T)  | 104(11) | 129(9)  | 132(12) | 56(8)   | 5(9)    | -29(9) |
| C(21T) | 157(10) | 138(8)  | 165(10) | 85(7)   | 0(8)    | -35(7) |
| C(22T) | 199(12) | 133(8)  | 191(12) | 88(8)   | -20(10) | -30(8) |
| C(23T) | 199(12) | 133(8)  | 191(12) | 88(8)   | -20(10) | -30(8) |
| C(24T) | 157(10) | 138(8)  | 165(10) | 85(7)   | 0(8)    | -35(7) |
| O(6U)  | 95(9)   | 128(7)  | 85(8)   | 54(6)   | 20(7)   | 44(7)  |
| C(21U) | 124(8)  | 145(7)  | 153(8)  | 109(6)  | 6(7)    | -40(7) |
| C(22U) | 158(10) | 158(7)  | 159(10) | 115(7)  | -21(8)  | 2(8)   |
| C(23U) | 158(10) | 158(7)  | 159(10) | 115(7)  | -21(8)  | 2(8)   |
| C(24U) | 124(8)  | 145(7)  | 153(8)  | 109(6)  | 6(7)    | -40(7) |
| O(7T)  | 97(7)   | 134(9)  | 82(6)   | 30(6)   | 33(5)   | 55(7)  |
| C(25T) | 101(7)  | 148(11) | 85(8)   | 0(7)    | 17(6)   | 45(8)  |
| C(26T) | 99(10)  | 219(15) | 129(10) | -35(10) | 22(8)   | 49(10) |
| C(27T) | 131(9)  | 183(10) | 94(7)   | 19(7)   | 52(7)   | 20(9)  |
| C(28T) | 112(6)  | 185(8)  | 93(6)   | 35(6)   | 51(6)   | 51(7)  |
| O(7U)  | 143(14) | 142(11) | 92(9)   | 21(9)   | 57(11)  | 26(11) |
| C(25U) | 205(16) | 152(13) | 109(11) | 30(10)  | 48(12)  | 44(14) |
| C(26U) | 160(16) | 171(13) | 116(12) | 9(11)   | 40(12)  | 54(13) |
| C(27U) | 131(9)  | 183(10) | 94(7)   | 19(7)   | 52(7)   | 20(9)  |
| C(28U) | 112(6)  | 185(8)  | 93(6)   | 35(6)   | 51(6)   | 51(7)  |
| O(1S)  | 271(12) | 223(10) | 236(13) | 99(9)   | 65(9)   | -13(9) |
| C(1S)  | 282(17) | 157(11) | 206(13) | 46(8)   | 78(10)  | 68(10) |
| C(2S)  | 272(14) | 139(11) | 242(16) | 17(9)   | 142(11) | 29(9)  |
| C(3S)  | 246(13) | 169(10) | 153(10) | 62(7)   | 92(9)   | 9(8)   |
| C(4S)  | 181(12) | 311(17) | 136(10) | 86(9)   | 53(9)   | 12(11) |

---

**Table S11.** Hydrogen coordinates ( $\times 10^4$ ) and isotropic displacement parameters ( $\text{\AA}^2 \times 10^3$ ) for vL275SL\_0m-5.

|        | x     | y     | z     | U(eq) |
|--------|-------|-------|-------|-------|
| H(5)   | 3185  | 3167  | -1400 | 68    |
| H(2A)  | 397   | 1638  | -758  | 94    |
| H(3A)  | 3204  | 902   | -567  | 78    |
| H(4A)  | 3907  | 1093  | -2165 | 86    |
| H(5A)  | 1111  | 1872  | -2312 | 101   |
| H(6A)  | -1479 | 552   | -2467 | 118   |
| H(7A)  | -21   | -148  | -1245 | 102   |
| H(8A)  | 2435  | -548  | -2239 | 85    |
| H(9A)  | 933   | 133   | -3493 | 109   |
| H(10A) | -783  | -1049 | -3049 | 115   |
| H(2B)  | 4561  | 3992  | 2037  | 92    |
| H(3B)  | 5582  | 5459  | 1468  | 77    |
| H(4B)  | 8295  | 4757  | 929   | 90    |
| H(5B)  | 7281  | 3277  | 1489  | 90    |
| H(6B)  | 7343  | 4241  | 3228  | 114   |
| H(7B)  | 6187  | 5796  | 3201  | 102   |
| H(8B)  | 8773  | 6329  | 2418  | 105   |
| H(9B)  | 10000 | 4776  | 2449  | 113   |
| H(10B) | 9365  | 5989  | 3837  | 118   |
| H(1A)  | 6898  | 918   | 976   | 139   |
| H(1B)  | 7838  | 1894  | 1288  | 139   |
| H(2C)  | 8793  | 658   | 474   | 182   |
| H(2D)  | 9260  | 1548  | 447   | 182   |
| H(3C)  | 6834  | 19    | -761  | 156   |
| H(3D)  | 8053  | 625   | -950  | 156   |
| H(4C)  | 6949  | 1679  | -580  | 125   |
| H(4D)  | 5475  | 842   | -1025 | 125   |
| H(1C)  | 5969  | 515   | 568   | 129   |
| H(1D)  | 7651  | 1160  | 1113  | 129   |
| H(2E)  | 7038  | -184  | -338  | 140   |

|        |      |      |       |     |
|--------|------|------|-------|-----|
| H(2F)  | 8566 | 618  | 64    | 140 |
| H(3E)  | 7552 | 664  | -1141 | 132 |
| H(3F)  | 5842 | 315  | -1148 | 132 |
| H(4E)  | 7990 | 1990 | -54   | 143 |
| H(4F)  | 6266 | 1765 | -575  | 143 |
| H(5C)  | 1876 | 1286 | 691   | 141 |
| H(5D)  | 2593 | 2249 | 876   | 141 |
| H(6C)  | 1231 | 1697 | 1835  | 147 |
| H(6D)  | 1662 | 2636 | 1917  | 147 |
| H(7C)  | 3172 | 2364 | 3054  | 162 |
| H(7D)  | 4020 | 3061 | 2818  | 162 |
| H(8C)  | 5408 | 2133 | 2515  | 171 |
| H(8D)  | 3929 | 1312 | 2159  | 171 |
| H(5E)  | 1735 | 1131 | 986   | 111 |
| H(5F)  | 1984 | 1976 | 876   | 111 |
| H(6E)  | 1304 | 2043 | 2165  | 182 |
| H(6F)  | 2637 | 2851 | 2303  | 182 |
| H(7E)  | 3870 | 2402 | 3190  | 200 |
| H(7F)  | 3039 | 1414 | 2519  | 200 |
| H(8E)  | 5451 | 2612 | 2456  | 166 |
| H(8F)  | 5222 | 1626 | 2175  | 166 |
| H(9C)  | 1085 | 3748 | -721  | 118 |
| H(9D)  | -6   | 4291 | -438  | 118 |
| H(10C) | -927 | 3532 | 142   | 120 |
| H(10D) | -161 | 2863 | -350  | 120 |
| H(11A) | 1913 | 3407 | 757   | 122 |
| H(11B) | 702  | 3611 | 1242  | 122 |
| H(12A) | 1363 | 4996 | 1467  | 105 |
| H(12B) | 2983 | 4857 | 1567  | 105 |
| H(13A) | 5343 | 7725 | 2539  | 136 |
| H(13B) | 4574 | 6788 | 2410  | 136 |
| H(14A) | 2926 | 6613 | 1346  | 164 |
| H(14B) | 3453 | 7612 | 1626  | 164 |
| H(14C) | 2525 | 6582 | 1517  | 164 |
| H(14D) | 3558 | 7343 | 1423  | 164 |
| H(15A) | 1213 | 6687 | 1984  | 161 |

|        |       |      |      |     |
|--------|-------|------|------|-----|
| H(15B) | 1321  | 7543 | 1908 | 161 |
| H(15C) | 1292  | 7495 | 1893 | 161 |
| H(15D) | 2799  | 8305 | 2283 | 161 |
| H(16A) | 2658  | 8361 | 3215 | 160 |
| H(16B) | 1934  | 7545 | 3321 | 160 |
| H(16C) | 2529  | 8301 | 3452 | 160 |
| H(16D) | 1784  | 7283 | 3006 | 160 |
| H(17A) | 8296  | 9365 | 5096 | 160 |
| H(17B) | 7751  | 9027 | 4108 | 160 |
| H(18A) | 9855  | 8783 | 4003 | 138 |
| H(18B) | 10490 | 9261 | 5003 | 138 |
| H(19A) | 10491 | 8038 | 4933 | 176 |
| H(19B) | 9579  | 7543 | 3954 | 176 |
| H(20A) | 7688  | 7060 | 4370 | 156 |
| H(20B) | 8376  | 7856 | 5291 | 156 |
| H(17C) | 7517  | 8265 | 3461 | 151 |
| H(17D) | 7452  | 7343 | 3364 | 151 |
| H(18C) | 9971  | 8805 | 4125 | 131 |
| H(18D) | 9945  | 7840 | 3816 | 131 |
| H(19C) | 10733 | 8858 | 5398 | 162 |
| H(19D) | 9780  | 7871 | 5046 | 162 |
| H(20C) | 8180  | 8534 | 5660 | 223 |
| H(20D) | 8574  | 9253 | 5369 | 223 |
| H(21A) | 5498  | 7285 | 5528 | 206 |
| H(21B) | 6255  | 6805 | 4852 | 206 |
| H(22A) | 4021  | 6063 | 5392 | 238 |
| H(22B) | 5374  | 5737 | 5132 | 238 |
| H(23A) | 4073  | 5066 | 3750 | 238 |
| H(23B) | 2641  | 5005 | 4090 | 238 |
| H(24A) | 3144  | 5827 | 3234 | 206 |
| H(24B) | 2120  | 6020 | 3838 | 206 |
| H(21C) | 3963  | 6638 | 5299 | 177 |
| H(21D) | 5713  | 6802 | 5347 | 177 |
| H(22C) | 5204  | 5441 | 4289 | 196 |
| H(22D) | 4039  | 5261 | 4771 | 196 |
| H(23C) | 2041  | 5136 | 3801 | 196 |

|        |       |       |      |     |
|--------|-------|-------|------|-----|
| H(23D) | 3062  | 4862  | 3204 | 196 |
| H(24C) | 3430  | 6052  | 3113 | 177 |
| H(24D) | 2266  | 6274  | 3623 | 177 |
| H(25A) | 6779  | 9763  | 5904 | 159 |
| H(25B) | 6597  | 9039  | 6193 | 159 |
| H(26A) | 5720  | 9869  | 7127 | 233 |
| H(26B) | 5272  | 10326 | 6580 | 233 |
| H(27A) | 2933  | 9471  | 6318 | 187 |
| H(27B) | 3549  | 8752  | 6415 | 187 |
| H(28A) | 2770  | 8136  | 5007 | 166 |
| H(28B) | 3015  | 9032  | 5000 | 166 |
| H(25C) | 4065  | 9468  | 4870 | 204 |
| H(25D) | 5800  | 9842  | 5440 | 204 |
| H(26C) | 3195  | 9734  | 5984 | 205 |
| H(26D) | 4796  | 10494 | 6443 | 205 |
| H(27C) | 5980  | 9678  | 6887 | 187 |
| H(27D) | 4351  | 9426  | 7017 | 187 |
| H(28C) | 5092  | 8220  | 6041 | 166 |
| H(28D) | 3386  | 8206  | 5750 | 166 |
| H(1E)  | 9241  | 2130  | 2852 | 276 |
| H(1F)  | 8700  | 2863  | 2743 | 276 |
| H(2G)  | 11300 | 3052  | 3895 | 289 |
| H(2H)  | 11133 | 3579  | 3386 | 289 |
| H(3G)  | 10276 | 4383  | 4214 | 241 |
| H(3H)  | 11155 | 4119  | 4850 | 241 |
| H(4G)  | 9101  | 3411  | 4866 | 274 |
| H(4H)  | 8250  | 3803  | 4363 | 274 |

---

**Table S12.** Torsion angles [°] for vL275SL\_0m-5.

---

|                         |           |
|-------------------------|-----------|
| C(5)-N(1)-C(2)-N(3)     | 0.0(5)    |
| C(1A)-N(1)-C(2)-N(3)    | -176.8(4) |
| C(5)-N(1)-C(2)-Li(1)    | -167.7(4) |
| C(1A)-N(1)-C(2)-Li(1)   | 15.5(8)   |
| N(1)-C(2)-N(3)-C(4)     | -0.7(6)   |
| Li(1)-C(2)-N(3)-C(4)    | 167.6(4)  |
| N(1)-C(2)-N(3)-C(1B)    | 178.4(4)  |
| Li(1)-C(2)-N(3)-C(1B)   | -13.4(7)  |
| C(2)-N(3)-C(4)-C(5)     | 1.0(6)    |
| C(1B)-N(3)-C(4)-C(5)    | -178.0(4) |
| C(2)-N(3)-C(4)-Li(2)#1  | -152.8(5) |
| C(1B)-N(3)-C(4)-Li(2)#1 | 28.2(7)   |
| C(2)-N(3)-C(4)-Li(2)    | 125.3(5)  |
| C(1B)-N(3)-C(4)-Li(2)   | -53.7(6)  |
| N(3)-C(4)-C(5)-N(1)     | -0.9(6)   |
| Li(2)#1-C(4)-C(5)-N(1)  | 150.7(5)  |
| Li(2)-C(4)-C(5)-N(1)    | -127.6(5) |
| C(2)-N(1)-C(5)-C(4)     | 0.7(6)    |
| C(1A)-N(1)-C(5)-C(4)    | 177.5(5)  |
| C(2)-N(1)-C(1A)-B(5A)   | 166.1(6)  |
| C(5)-N(1)-C(1A)-B(5A)   | -10.3(9)  |
| C(2)-N(1)-C(1A)-B(4A)   | -100.8(7) |
| C(5)-N(1)-C(1A)-B(4A)   | 82.8(7)   |
| C(2)-N(1)-C(1A)-B(3A)   | -10.5(8)  |
| C(5)-N(1)-C(1A)-B(3A)   | 173.1(5)  |
| C(2)-N(1)-C(1A)-B(2A)   | 77.8(7)   |
| C(5)-N(1)-C(1A)-B(2A)   | -98.6(7)  |
| N(1)-C(1A)-B(2A)-B(6A)  | 147.4(5)  |
| B(5A)-C(1A)-B(2A)-B(6A) | 27.6(5)   |
| B(4A)-C(1A)-B(2A)-B(6A) | -33.8(7)  |
| B(3A)-C(1A)-B(2A)-B(6A) | -93.2(6)  |
| N(1)-C(1A)-B(2A)-B(7A)  | -147.7(5) |
| B(5A)-C(1A)-B(2A)-B(7A) | 92.5(6)   |
| B(4A)-C(1A)-B(2A)-B(7A) | 31.1(7)   |

|                         |           |
|-------------------------|-----------|
| B(3A)-C(1A)-B(2A)-B(7A) | -28.3(5)  |
| N(1)-C(1A)-B(2A)-B(5A)  | 119.8(6)  |
| B(4A)-C(1A)-B(2A)-B(5A) | -61.4(5)  |
| B(3A)-C(1A)-B(2A)-B(5A) | -120.8(5) |
| N(1)-C(1A)-B(2A)-B(3A)  | -119.4(6) |
| B(5A)-C(1A)-B(2A)-B(3A) | 120.8(5)  |
| B(4A)-C(1A)-B(2A)-B(3A) | 59.4(5)   |
| N(1)-C(1A)-B(3A)-B(7A)  | 147.0(5)  |
| B(5A)-C(1A)-B(3A)-B(7A) | -30.0(7)  |
| B(4A)-C(1A)-B(3A)-B(7A) | -91.7(5)  |
| B(2A)-C(1A)-B(3A)-B(7A) | 27.8(5)   |
| N(1)-C(1A)-B(3A)-B(8A)  | -149.4(5) |
| B(5A)-C(1A)-B(3A)-B(8A) | 33.5(7)   |
| B(4A)-C(1A)-B(3A)-B(8A) | -28.2(5)  |
| B(2A)-C(1A)-B(3A)-B(8A) | 91.3(5)   |
| N(1)-C(1A)-B(3A)-B(2A)  | 119.3(6)  |
| B(5A)-C(1A)-B(3A)-B(2A) | -57.8(5)  |
| B(4A)-C(1A)-B(3A)-B(2A) | -119.5(5) |
| N(1)-C(1A)-B(3A)-B(4A)  | -121.3(6) |
| B(5A)-C(1A)-B(3A)-B(4A) | 61.7(5)   |
| B(2A)-C(1A)-B(3A)-B(4A) | 119.5(5)  |
| B(6A)-B(2A)-B(3A)-C(1A) | 103.8(6)  |
| B(7A)-B(2A)-B(3A)-C(1A) | 148.9(6)  |
| B(5A)-B(2A)-B(3A)-C(1A) | 44.1(4)   |
| C(1A)-B(2A)-B(3A)-B(7A) | -148.9(6) |
| B(6A)-B(2A)-B(3A)-B(7A) | -45.0(5)  |
| B(5A)-B(2A)-B(3A)-B(7A) | -104.8(5) |
| C(1A)-B(2A)-B(3A)-B(8A) | -104.3(5) |
| B(6A)-B(2A)-B(3A)-B(8A) | -0.5(6)   |
| B(7A)-B(2A)-B(3A)-B(8A) | 44.5(5)   |
| B(5A)-B(2A)-B(3A)-B(8A) | -60.3(5)  |
| C(1A)-B(2A)-B(3A)-B(4A) | -45.1(4)  |
| B(6A)-B(2A)-B(3A)-B(4A) | 58.8(5)   |
| B(7A)-B(2A)-B(3A)-B(4A) | 103.8(5)  |
| B(5A)-B(2A)-B(3A)-B(4A) | -1.0(4)   |
| N(1)-C(1A)-B(4A)-B(8A)  | 148.1(5)  |

|                         |           |
|-------------------------|-----------|
| B(5A)-C(1A)-B(4A)-B(8A) | -90.4(6)  |
| B(3A)-C(1A)-B(4A)-B(8A) | 28.2(5)   |
| B(2A)-C(1A)-B(4A)-B(8A) | -30.7(7)  |
| N(1)-C(1A)-B(4A)-B(9A)  | -148.3(5) |
| B(5A)-C(1A)-B(4A)-B(9A) | -26.7(5)  |
| B(3A)-C(1A)-B(4A)-B(9A) | 91.8(5)   |
| B(2A)-C(1A)-B(4A)-B(9A) | 32.9(6)   |
| N(1)-C(1A)-B(4A)-B(3A)  | 120.0(6)  |
| B(5A)-C(1A)-B(4A)-B(3A) | -118.5(5) |
| B(2A)-C(1A)-B(4A)-B(3A) | -58.9(5)  |
| N(1)-C(1A)-B(4A)-B(5A)  | -121.5(7) |
| B(3A)-C(1A)-B(4A)-B(5A) | 118.5(5)  |
| B(2A)-C(1A)-B(4A)-B(5A) | 59.7(5)   |
| B(7A)-B(3A)-B(4A)-C(1A) | 104.1(5)  |
| B(8A)-B(3A)-B(4A)-C(1A) | 148.8(6)  |
| B(2A)-B(3A)-B(4A)-C(1A) | 45.9(4)   |
| C(1A)-B(3A)-B(4A)-B(8A) | -148.8(6) |
| B(7A)-B(3A)-B(4A)-B(8A) | -44.7(4)  |
| B(2A)-B(3A)-B(4A)-B(8A) | -102.8(5) |
| C(1A)-B(3A)-B(4A)-B(9A) | -103.7(5) |
| B(7A)-B(3A)-B(4A)-B(9A) | 0.3(6)    |
| B(8A)-B(3A)-B(4A)-B(9A) | 45.0(5)   |
| B(2A)-B(3A)-B(4A)-B(9A) | -57.8(5)  |
| C(1A)-B(3A)-B(4A)-B(5A) | -44.9(4)  |
| B(7A)-B(3A)-B(4A)-B(5A) | 59.1(5)   |
| B(8A)-B(3A)-B(4A)-B(5A) | 103.8(5)  |
| B(2A)-B(3A)-B(4A)-B(5A) | 1.0(4)    |
| N(1)-C(1A)-B(5A)-B(6A)  | -146.4(6) |
| B(4A)-C(1A)-B(5A)-B(6A) | 91.2(6)   |
| B(3A)-C(1A)-B(5A)-B(6A) | 30.6(7)   |
| B(2A)-C(1A)-B(5A)-B(6A) | -27.3(5)  |
| N(1)-C(1A)-B(5A)-B(2A)  | -119.2(6) |
| B(4A)-C(1A)-B(5A)-B(2A) | 118.5(5)  |
| B(3A)-C(1A)-B(5A)-B(2A) | 57.9(5)   |
| N(1)-C(1A)-B(5A)-B(9A)  | 149.3(6)  |
| B(4A)-C(1A)-B(5A)-B(9A) | 27.0(5)   |



|                          |           |
|--------------------------|-----------|
| B(3A)-C(1A)-B(5A)-B(9A)  | -33.7(7)  |
| B(2A)-C(1A)-B(5A)-B(9A)  | -91.6(6)  |
| N(1)-C(1A)-B(5A)-B(4A)   | 122.3(6)  |
| B(3A)-C(1A)-B(5A)-B(4A)  | -60.6(5)  |
| B(2A)-C(1A)-B(5A)-B(4A)  | -118.5(5) |
| B(6A)-B(2A)-B(5A)-C(1A)  | -149.7(6) |
| B(7A)-B(2A)-B(5A)-C(1A)  | -104.3(5) |
| B(3A)-B(2A)-B(5A)-C(1A)  | -44.9(4)  |
| C(1A)-B(2A)-B(5A)-B(6A)  | 149.7(6)  |
| B(7A)-B(2A)-B(5A)-B(6A)  | 45.4(5)   |
| B(3A)-B(2A)-B(5A)-B(6A)  | 104.8(5)  |
| C(1A)-B(2A)-B(5A)-B(9A)  | 105.2(6)  |
| B(6A)-B(2A)-B(5A)-B(9A)  | -44.6(5)  |
| B(7A)-B(2A)-B(5A)-B(9A)  | 0.9(6)    |
| B(3A)-B(2A)-B(5A)-B(9A)  | 60.3(5)   |
| C(1A)-B(2A)-B(5A)-B(4A)  | 45.9(4)   |
| B(6A)-B(2A)-B(5A)-B(4A)  | -103.8(5) |
| B(7A)-B(2A)-B(5A)-B(4A)  | -58.4(5)  |
| B(3A)-B(2A)-B(5A)-B(4A)  | 1.0(4)    |
| B(8A)-B(4A)-B(5A)-C(1A)  | 105.0(5)  |
| B(9A)-B(4A)-B(5A)-C(1A)  | 150.2(6)  |
| B(3A)-B(4A)-B(5A)-C(1A)  | 46.4(4)   |
| C(1A)-B(4A)-B(5A)-B(6A)  | -105.7(6) |
| B(8A)-B(4A)-B(5A)-B(6A)  | -0.6(6)   |
| B(9A)-B(4A)-B(5A)-B(6A)  | 44.6(5)   |
| B(3A)-B(4A)-B(5A)-B(6A)  | -59.2(5)  |
| C(1A)-B(4A)-B(5A)-B(2A)  | -47.4(4)  |
| B(8A)-B(4A)-B(5A)-B(2A)  | 57.6(5)   |
| B(9A)-B(4A)-B(5A)-B(2A)  | 102.8(5)  |
| B(3A)-B(4A)-B(5A)-B(2A)  | -1.0(4)   |
| C(1A)-B(4A)-B(5A)-B(9A)  | -150.2(6) |
| B(8A)-B(4A)-B(5A)-B(9A)  | -45.2(5)  |
| B(3A)-B(4A)-B(5A)-B(9A)  | -103.8(5) |
| C(1A)-B(2A)-B(6A)-B(10A) | 78.4(7)   |
| B(7A)-B(2A)-B(6A)-B(10A) | -23.6(6)  |
| B(5A)-B(2A)-B(6A)-B(10A) | 103.9(7)  |

|                          |           |
|--------------------------|-----------|
| B(3A)-B(2A)-B(6A)-B(10A) | 21.0(8)   |
| C(1A)-B(2A)-B(6A)-B(5A)  | -25.5(5)  |
| B(7A)-B(2A)-B(6A)-B(5A)  | -127.4(6) |
| B(3A)-B(2A)-B(6A)-B(5A)  | -82.9(5)  |
| C(1A)-B(2A)-B(6A)-B(7A)  | 101.9(6)  |
| B(5A)-B(2A)-B(6A)-B(7A)  | 127.4(6)  |
| B(3A)-B(2A)-B(6A)-B(7A)  | 44.5(5)   |
| C(1A)-B(2A)-B(6A)-B(9A)  | 19.6(7)   |
| B(7A)-B(2A)-B(6A)-B(9A)  | -82.3(5)  |
| B(5A)-B(2A)-B(6A)-B(9A)  | 45.1(5)   |
| B(3A)-B(2A)-B(6A)-B(9A)  | -37.8(6)  |
| C(1A)-B(5A)-B(6A)-B(10A) | -77.1(8)  |
| B(2A)-B(5A)-B(6A)-B(10A) | -103.8(7) |
| B(9A)-B(5A)-B(6A)-B(10A) | 23.8(6)   |
| B(4A)-B(5A)-B(6A)-B(10A) | -20.5(8)  |
| C(1A)-B(5A)-B(6A)-B(2A)  | 26.7(5)   |
| B(9A)-B(5A)-B(6A)-B(2A)  | 127.6(6)  |
| B(4A)-B(5A)-B(6A)-B(2A)  | 83.3(5)   |
| C(1A)-B(5A)-B(6A)-B(7A)  | -18.2(7)  |
| B(2A)-B(5A)-B(6A)-B(7A)  | -44.8(5)  |
| B(9A)-B(5A)-B(6A)-B(7A)  | 82.8(6)   |
| B(4A)-B(5A)-B(6A)-B(7A)  | 38.5(7)   |
| C(1A)-B(5A)-B(6A)-B(9A)  | -101.0(6) |
| B(2A)-B(5A)-B(6A)-B(9A)  | -127.6(6) |
| B(4A)-B(5A)-B(6A)-B(9A)  | -44.3(5)  |
| C(1A)-B(2A)-B(7A)-B(10A) | -77.3(7)  |
| B(6A)-B(2A)-B(7A)-B(10A) | 24.0(6)   |
| B(5A)-B(2A)-B(7A)-B(10A) | -21.2(8)  |
| B(3A)-B(2A)-B(7A)-B(10A) | -104.0(7) |
| C(1A)-B(2A)-B(7A)-B(6A)  | -101.3(6) |
| B(5A)-B(2A)-B(7A)-B(6A)  | -45.2(5)  |
| B(3A)-B(2A)-B(7A)-B(6A)  | -128.0(6) |
| C(1A)-B(2A)-B(7A)-B(3A)  | 26.7(5)   |
| B(6A)-B(2A)-B(7A)-B(3A)  | 128.0(6)  |
| B(5A)-B(2A)-B(7A)-B(3A)  | 82.9(5)   |
| C(1A)-B(2A)-B(7A)-B(8A)  | -18.1(7)  |

|                          |           |
|--------------------------|-----------|
| B(6A)-B(2A)-B(7A)-B(8A)  | 83.2(6)   |
| B(5A)-B(2A)-B(7A)-B(8A)  | 38.0(6)   |
| B(3A)-B(2A)-B(7A)-B(8A)  | -44.8(5)  |
| B(2A)-B(6A)-B(7A)-B(10A) | -153.8(7) |
| B(5A)-B(6A)-B(7A)-B(10A) | -108.7(7) |
| B(9A)-B(6A)-B(7A)-B(10A) | -48.8(5)  |
| B(10A)-B(6A)-B(7A)-B(2A) | 153.8(7)  |
| B(5A)-B(6A)-B(7A)-B(2A)  | 45.1(5)   |
| B(9A)-B(6A)-B(7A)-B(2A)  | 105.0(5)  |
| B(10A)-B(6A)-B(7A)-B(3A) | 109.0(6)  |
| B(2A)-B(6A)-B(7A)-B(3A)  | -44.8(5)  |
| B(5A)-B(6A)-B(7A)-B(3A)  | 0.3(7)    |
| B(9A)-B(6A)-B(7A)-B(3A)  | 60.2(5)   |
| B(10A)-B(6A)-B(7A)-B(8A) | 49.5(5)   |
| B(2A)-B(6A)-B(7A)-B(8A)  | -104.2(5) |
| B(5A)-B(6A)-B(7A)-B(8A)  | -59.2(6)  |
| B(9A)-B(6A)-B(7A)-B(8A)  | 0.7(4)    |
| C(1A)-B(3A)-B(7A)-B(10A) | 77.3(7)   |
| B(8A)-B(3A)-B(7A)-B(10A) | -23.4(5)  |
| B(2A)-B(3A)-B(7A)-B(10A) | 104.0(7)  |
| B(4A)-B(3A)-B(7A)-B(10A) | 21.2(7)   |
| C(1A)-B(3A)-B(7A)-B(2A)  | -26.7(5)  |
| B(8A)-B(3A)-B(7A)-B(2A)  | -127.4(5) |
| B(4A)-B(3A)-B(7A)-B(2A)  | -82.8(5)  |
| C(1A)-B(3A)-B(7A)-B(6A)  | 16.9(6)   |
| B(8A)-B(3A)-B(7A)-B(6A)  | -83.8(5)  |
| B(2A)-B(3A)-B(7A)-B(6A)  | 43.6(5)   |
| B(4A)-B(3A)-B(7A)-B(6A)  | -39.2(6)  |
| C(1A)-B(3A)-B(7A)-B(8A)  | 100.7(5)  |
| B(2A)-B(3A)-B(7A)-B(8A)  | 127.4(5)  |
| B(4A)-B(3A)-B(7A)-B(8A)  | 44.6(4)   |
| C(1A)-B(3A)-B(8A)-B(10A) | -77.6(6)  |
| B(7A)-B(3A)-B(8A)-B(10A) | 23.4(5)   |
| B(2A)-B(3A)-B(8A)-B(10A) | -20.4(6)  |
| B(4A)-B(3A)-B(8A)-B(10A) | -103.9(6) |
| C(1A)-B(3A)-B(8A)-B(7A)  | -101.1(6) |

|                          |           |
|--------------------------|-----------|
| B(2A)-B(3A)-B(8A)-B(7A)  | -43.9(5)  |
| B(4A)-B(3A)-B(8A)-B(7A)  | -127.4(5) |
| C(1A)-B(3A)-B(8A)-B(4A)  | 26.3(5)   |
| B(7A)-B(3A)-B(8A)-B(4A)  | 127.4(5)  |
| B(2A)-B(3A)-B(8A)-B(4A)  | 83.5(5)   |
| C(1A)-B(3A)-B(8A)-B(9A)  | -18.9(6)  |
| B(7A)-B(3A)-B(8A)-B(9A)  | 82.2(5)   |
| B(2A)-B(3A)-B(8A)-B(9A)  | 38.3(6)   |
| B(4A)-B(3A)-B(8A)-B(9A)  | -45.2(5)  |
| B(2A)-B(7A)-B(8A)-B(10A) | -108.7(6) |
| B(6A)-B(7A)-B(8A)-B(10A) | -50.4(5)  |
| B(3A)-B(7A)-B(8A)-B(10A) | -154.0(6) |
| B(10A)-B(7A)-B(8A)-B(3A) | 154.0(6)  |
| B(2A)-B(7A)-B(8A)-B(3A)  | 45.3(5)   |
| B(6A)-B(7A)-B(8A)-B(3A)  | 103.6(5)  |
| B(10A)-B(7A)-B(8A)-B(4A) | 108.9(6)  |
| B(2A)-B(7A)-B(8A)-B(4A)  | 0.3(6)    |
| B(6A)-B(7A)-B(8A)-B(4A)  | 58.5(5)   |
| B(3A)-B(7A)-B(8A)-B(4A)  | -45.1(5)  |
| B(10A)-B(7A)-B(8A)-B(9A) | 49.7(5)   |
| B(2A)-B(7A)-B(8A)-B(9A)  | -59.0(5)  |
| B(6A)-B(7A)-B(8A)-B(9A)  | -0.7(4)   |
| B(3A)-B(7A)-B(8A)-B(9A)  | -104.3(5) |
| C(1A)-B(4A)-B(8A)-B(10A) | 77.0(7)   |
| B(9A)-B(4A)-B(8A)-B(10A) | -23.0(6)  |
| B(3A)-B(4A)-B(8A)-B(10A) | 103.9(6)  |
| B(5A)-B(4A)-B(8A)-B(10A) | 22.0(7)   |
| C(1A)-B(4A)-B(8A)-B(3A)  | -26.8(5)  |
| B(9A)-B(4A)-B(8A)-B(3A)  | -126.8(5) |
| B(5A)-B(4A)-B(8A)-B(3A)  | -81.9(5)  |
| C(1A)-B(4A)-B(8A)-B(7A)  | 17.9(7)   |
| B(9A)-B(4A)-B(8A)-B(7A)  | -82.1(5)  |
| B(3A)-B(4A)-B(8A)-B(7A)  | 44.7(5)   |
| B(5A)-B(4A)-B(8A)-B(7A)  | -37.2(6)  |
| C(1A)-B(4A)-B(8A)-B(9A)  | 100.0(6)  |
| B(3A)-B(4A)-B(8A)-B(9A)  | 126.8(5)  |

|                          |           |
|--------------------------|-----------|
| B(5A)-B(4A)-B(8A)-B(9A)  | 45.0(5)   |
| B(2A)-B(6A)-B(9A)-B(10A) | 108.3(6)  |
| B(5A)-B(6A)-B(9A)-B(10A) | 153.4(7)  |
| B(7A)-B(6A)-B(9A)-B(10A) | 49.1(5)   |
| B(10A)-B(6A)-B(9A)-B(5A) | -153.4(7) |
| B(2A)-B(6A)-B(9A)-B(5A)  | -45.1(5)  |
| B(7A)-B(6A)-B(9A)-B(5A)  | -104.3(5) |
| B(10A)-B(6A)-B(9A)-B(8A) | -49.8(5)  |
| B(2A)-B(6A)-B(9A)-B(8A)  | 58.5(5)   |
| B(5A)-B(6A)-B(9A)-B(8A)  | 103.6(5)  |
| B(7A)-B(6A)-B(9A)-B(8A)  | -0.7(4)   |
| B(10A)-B(6A)-B(9A)-B(4A) | -108.7(6) |
| B(2A)-B(6A)-B(9A)-B(4A)  | -0.4(6)   |
| B(5A)-B(6A)-B(9A)-B(4A)  | 44.6(5)   |
| B(7A)-B(6A)-B(9A)-B(4A)  | -59.7(5)  |
| C(1A)-B(5A)-B(9A)-B(10A) | 78.3(8)   |
| B(6A)-B(5A)-B(9A)-B(10A) | -24.2(6)  |
| B(2A)-B(5A)-B(9A)-B(10A) | 19.6(8)   |
| B(4A)-B(5A)-B(9A)-B(10A) | 103.6(7)  |
| C(1A)-B(5A)-B(9A)-B(6A)  | 102.5(7)  |
| B(2A)-B(5A)-B(9A)-B(6A)  | 43.8(5)   |
| B(4A)-B(5A)-B(9A)-B(6A)  | 127.8(6)  |
| C(1A)-B(5A)-B(9A)-B(8A)  | 19.6(7)   |
| B(6A)-B(5A)-B(9A)-B(8A)  | -82.8(6)  |
| B(2A)-B(5A)-B(9A)-B(8A)  | -39.1(6)  |
| B(4A)-B(5A)-B(9A)-B(8A)  | 45.0(5)   |
| C(1A)-B(5A)-B(9A)-B(4A)  | -25.4(5)  |
| B(6A)-B(5A)-B(9A)-B(4A)  | -127.8(6) |
| B(2A)-B(5A)-B(9A)-B(4A)  | -84.1(5)  |
| B(3A)-B(8A)-B(9A)-B(10A) | -109.0(6) |
| B(7A)-B(8A)-B(9A)-B(10A) | -49.9(5)  |
| B(4A)-B(8A)-B(9A)-B(10A) | -154.4(6) |
| B(10A)-B(8A)-B(9A)-B(6A) | 50.7(5)   |
| B(3A)-B(8A)-B(9A)-B(6A)  | -58.3(5)  |
| B(7A)-B(8A)-B(9A)-B(6A)  | 0.7(4)    |
| B(4A)-B(8A)-B(9A)-B(6A)  | -103.8(5) |

|                          |           |
|--------------------------|-----------|
| B(10A)-B(8A)-B(9A)-B(5A) | 109.0(7)  |
| B(3A)-B(8A)-B(9A)-B(5A)  | 0.0(6)    |
| B(7A)-B(8A)-B(9A)-B(5A)  | 59.0(6)   |
| B(4A)-B(8A)-B(9A)-B(5A)  | -45.5(5)  |
| B(10A)-B(8A)-B(9A)-B(4A) | 154.4(6)  |
| B(3A)-B(8A)-B(9A)-B(4A)  | 45.4(5)   |
| B(7A)-B(8A)-B(9A)-B(4A)  | 104.5(5)  |
| C(1A)-B(4A)-B(9A)-B(10A) | -79.0(7)  |
| B(8A)-B(4A)-B(9A)-B(10A) | 22.9(5)   |
| B(3A)-B(4A)-B(9A)-B(10A) | -21.8(7)  |
| B(5A)-B(4A)-B(9A)-B(10A) | -103.7(7) |
| C(1A)-B(4A)-B(9A)-B(6A)  | -19.0(6)  |
| B(8A)-B(4A)-B(9A)-B(6A)  | 82.9(5)   |
| B(3A)-B(4A)-B(9A)-B(6A)  | 38.2(6)   |
| B(5A)-B(4A)-B(9A)-B(6A)  | -43.8(5)  |
| C(1A)-B(4A)-B(9A)-B(5A)  | 24.8(5)   |
| B(8A)-B(4A)-B(9A)-B(5A)  | 126.6(6)  |
| B(3A)-B(4A)-B(9A)-B(5A)  | 81.9(5)   |
| C(1A)-B(4A)-B(9A)-B(8A)  | -101.9(5) |
| B(3A)-B(4A)-B(9A)-B(8A)  | -44.7(4)  |
| B(5A)-B(4A)-B(9A)-B(8A)  | -126.6(6) |
| B(6A)-B(9A)-B(10A)-B(8A) | -114.1(6) |
| B(5A)-B(9A)-B(10A)-B(8A) | -89.6(6)  |
| B(4A)-B(9A)-B(10A)-B(8A) | -23.7(6)  |
| B(6A)-B(9A)-B(10A)-B(7A) | -56.2(6)  |
| B(5A)-B(9A)-B(10A)-B(7A) | -31.7(8)  |
| B(8A)-B(9A)-B(10A)-B(7A) | 57.9(5)   |
| B(4A)-B(9A)-B(10A)-B(7A) | 34.1(8)   |
| B(5A)-B(9A)-B(10A)-B(6A) | 24.5(6)   |
| B(8A)-B(9A)-B(10A)-B(6A) | 114.1(6)  |
| B(4A)-B(9A)-B(10A)-B(6A) | 90.4(6)   |
| B(3A)-B(8A)-B(10A)-B(9A) | 90.0(6)   |
| B(7A)-B(8A)-B(10A)-B(9A) | 114.2(5)  |
| B(4A)-B(8A)-B(10A)-B(9A) | 23.9(5)   |
| B(3A)-B(8A)-B(10A)-B(7A) | -24.2(5)  |
| B(4A)-B(8A)-B(10A)-B(7A) | -90.3(5)  |

|                          |           |
|--------------------------|-----------|
| B(9A)-B(8A)-B(10A)-B(7A) | -114.2(5) |
| B(3A)-B(8A)-B(10A)-B(6A) | 32.3(7)   |
| B(7A)-B(8A)-B(10A)-B(6A) | 56.6(6)   |
| B(4A)-B(8A)-B(10A)-B(6A) | -33.8(7)  |
| B(9A)-B(8A)-B(10A)-B(6A) | -57.6(5)  |
| B(2A)-B(7A)-B(10A)-B(9A) | 32.5(8)   |
| B(6A)-B(7A)-B(10A)-B(9A) | 56.7(6)   |
| B(3A)-B(7A)-B(10A)-B(9A) | -34.0(8)  |
| B(8A)-B(7A)-B(10A)-B(9A) | -58.3(5)  |
| B(2A)-B(7A)-B(10A)-B(8A) | 90.8(6)   |
| B(6A)-B(7A)-B(10A)-B(8A) | 114.9(6)  |
| B(3A)-B(7A)-B(10A)-B(8A) | 24.2(5)   |
| B(2A)-B(7A)-B(10A)-B(6A) | -24.2(6)  |
| B(3A)-B(7A)-B(10A)-B(6A) | -90.7(6)  |
| B(8A)-B(7A)-B(10A)-B(6A) | -114.9(6) |
| B(2A)-B(6A)-B(10A)-B(9A) | -91.1(7)  |
| B(5A)-B(6A)-B(10A)-B(9A) | -25.0(6)  |
| B(7A)-B(6A)-B(10A)-B(9A) | -115.5(6) |
| B(2A)-B(6A)-B(10A)-B(8A) | -32.8(8)  |
| B(5A)-B(6A)-B(10A)-B(8A) | 33.3(8)   |
| B(7A)-B(6A)-B(10A)-B(8A) | -57.2(5)  |
| B(9A)-B(6A)-B(10A)-B(8A) | 58.3(5)   |
| B(2A)-B(6A)-B(10A)-B(7A) | 24.5(6)   |
| B(5A)-B(6A)-B(10A)-B(7A) | 90.5(7)   |
| B(9A)-B(6A)-B(10A)-B(7A) | 115.5(6)  |
| C(2)-N(3)-C(1B)-B(5B)    | 33.4(8)   |
| C(4)-N(3)-C(1B)-B(5B)    | -147.6(6) |
| C(2)-N(3)-C(1B)-B(4B)    | 124.5(6)  |
| C(4)-N(3)-C(1B)-B(4B)    | -56.6(7)  |
| C(2)-N(3)-C(1B)-B(3B)    | -147.7(5) |
| C(4)-N(3)-C(1B)-B(3B)    | 31.3(7)   |
| C(2)-N(3)-C(1B)-B(2B)    | -58.6(7)  |
| C(4)-N(3)-C(1B)-B(2B)    | 120.3(6)  |
| N(3)-C(1B)-B(2B)-B(7B)   | -146.6(5) |
| B(5B)-C(1B)-B(2B)-B(7B)  | 91.0(5)   |
| B(4B)-C(1B)-B(2B)-B(7B)  | 30.7(6)   |

|                         |           |
|-------------------------|-----------|
| B(3B)-C(1B)-B(2B)-B(7B) | -27.9(5)  |
| N(3)-C(1B)-B(2B)-B(6B)  | 149.1(5)  |
| B(5B)-C(1B)-B(2B)-B(6B) | 26.7(5)   |
| B(4B)-C(1B)-B(2B)-B(6B) | -33.6(7)  |
| B(3B)-C(1B)-B(2B)-B(6B) | -92.2(6)  |
| N(3)-C(1B)-B(2B)-B(3B)  | -118.7(6) |
| B(5B)-C(1B)-B(2B)-B(3B) | 118.9(5)  |
| B(4B)-C(1B)-B(2B)-B(3B) | 58.7(5)   |
| N(3)-C(1B)-B(2B)-B(5B)  | 122.4(6)  |
| B(4B)-C(1B)-B(2B)-B(5B) | -60.3(5)  |
| B(3B)-C(1B)-B(2B)-B(5B) | -118.9(5) |
| N(3)-C(1B)-B(3B)-B(8B)  | -146.6(5) |
| B(5B)-C(1B)-B(3B)-B(8B) | 32.5(7)   |
| B(4B)-C(1B)-B(3B)-B(8B) | -27.7(5)  |
| B(2B)-C(1B)-B(3B)-B(8B) | 92.6(6)   |
| N(3)-C(1B)-B(3B)-B(7B)  | 149.0(5)  |
| B(5B)-C(1B)-B(3B)-B(7B) | -31.9(7)  |
| B(4B)-C(1B)-B(3B)-B(7B) | -92.1(5)  |
| B(2B)-C(1B)-B(3B)-B(7B) | 28.2(5)   |
| N(3)-C(1B)-B(3B)-B(4B)  | -118.9(6) |
| B(5B)-C(1B)-B(3B)-B(4B) | 60.1(5)   |
| B(2B)-C(1B)-B(3B)-B(4B) | 120.3(5)  |
| N(3)-C(1B)-B(3B)-B(2B)  | 120.8(6)  |
| B(5B)-C(1B)-B(3B)-B(2B) | -60.2(5)  |
| B(4B)-C(1B)-B(3B)-B(2B) | -120.3(5) |
| B(7B)-B(2B)-B(3B)-C(1B) | 148.6(6)  |
| B(6B)-B(2B)-B(3B)-C(1B) | 103.9(5)  |
| B(5B)-B(2B)-B(3B)-C(1B) | 45.1(4)   |
| C(1B)-B(2B)-B(3B)-B(8B) | -104.1(5) |
| B(7B)-B(2B)-B(3B)-B(8B) | 44.5(5)   |
| B(6B)-B(2B)-B(3B)-B(8B) | -0.2(6)   |
| B(5B)-B(2B)-B(3B)-B(8B) | -59.0(5)  |
| C(1B)-B(2B)-B(3B)-B(7B) | -148.6(6) |
| B(6B)-B(2B)-B(3B)-B(7B) | -44.8(5)  |
| B(5B)-B(2B)-B(3B)-B(7B) | -103.5(5) |
| C(1B)-B(2B)-B(3B)-B(4B) | -45.2(4)  |



|                         |           |
|-------------------------|-----------|
| B(7B)-B(2B)-B(3B)-B(4B) | 103.5(5)  |
| B(6B)-B(2B)-B(3B)-B(4B) | 58.7(5)   |
| B(5B)-B(2B)-B(3B)-B(4B) | 0.0(4)    |
| N(3)-C(1B)-B(4B)-B(8B)  | 146.1(5)  |
| B(5B)-C(1B)-B(4B)-B(8B) | -91.5(6)  |
| B(3B)-C(1B)-B(4B)-B(8B) | 27.5(5)   |
| B(2B)-C(1B)-B(4B)-B(8B) | -31.3(7)  |
| N(3)-C(1B)-B(4B)-B(9B)  | -149.2(5) |
| B(5B)-C(1B)-B(4B)-B(9B) | -26.8(5)  |
| B(3B)-C(1B)-B(4B)-B(9B) | 92.3(6)   |
| B(2B)-C(1B)-B(4B)-B(9B) | 33.5(7)   |
| N(3)-C(1B)-B(4B)-B(3B)  | 118.6(6)  |
| B(5B)-C(1B)-B(4B)-B(3B) | -119.0(5) |
| B(2B)-C(1B)-B(4B)-B(3B) | -58.8(5)  |
| N(3)-C(1B)-B(4B)-B(5B)  | -122.4(6) |
| B(3B)-C(1B)-B(4B)-B(5B) | 119.0(5)  |
| B(2B)-C(1B)-B(4B)-B(5B) | 60.2(5)   |
| B(8B)-B(3B)-B(4B)-C(1B) | 149.3(6)  |
| B(7B)-B(3B)-B(4B)-C(1B) | 104.2(5)  |
| B(2B)-B(3B)-B(4B)-C(1B) | 45.2(4)   |
| C(1B)-B(3B)-B(4B)-B(8B) | -149.3(6) |
| B(7B)-B(3B)-B(4B)-B(8B) | -45.1(5)  |
| B(2B)-B(3B)-B(4B)-B(8B) | -104.1(5) |
| C(1B)-B(3B)-B(4B)-B(9B) | -103.4(5) |
| B(8B)-B(3B)-B(4B)-B(9B) | 45.9(5)   |
| B(7B)-B(3B)-B(4B)-B(9B) | 0.7(6)    |
| B(2B)-B(3B)-B(4B)-B(9B) | -58.3(5)  |
| C(1B)-B(3B)-B(4B)-B(5B) | -45.2(4)  |
| B(8B)-B(3B)-B(4B)-B(5B) | 104.1(5)  |
| B(7B)-B(3B)-B(4B)-B(5B) | 59.0(5)   |
| B(2B)-B(3B)-B(4B)-B(5B) | 0.0(4)    |
| N(3)-C(1B)-B(5B)-B(9B)  | 146.7(6)  |
| B(4B)-C(1B)-B(5B)-B(9B) | 27.3(6)   |
| B(3B)-C(1B)-B(5B)-B(9B) | -32.3(7)  |
| B(2B)-C(1B)-B(5B)-B(9B) | -92.0(6)  |
| N(3)-C(1B)-B(5B)-B(6B)  | -148.0(6) |

|                         |           |
|-------------------------|-----------|
| B(4B)-C(1B)-B(5B)-B(6B) | 92.6(6)   |
| B(3B)-C(1B)-B(5B)-B(6B) | 33.0(7)   |
| B(2B)-C(1B)-B(5B)-B(6B) | -26.7(6)  |
| N(3)-C(1B)-B(5B)-B(4B)  | 119.5(6)  |
| B(3B)-C(1B)-B(5B)-B(4B) | -59.5(5)  |
| B(2B)-C(1B)-B(5B)-B(4B) | -119.3(5) |
| N(3)-C(1B)-B(5B)-B(2B)  | -121.3(6) |
| B(4B)-C(1B)-B(5B)-B(2B) | 119.3(5)  |
| B(3B)-C(1B)-B(5B)-B(2B) | 59.7(5)   |
| B(8B)-B(4B)-B(5B)-C(1B) | 104.2(5)  |
| B(9B)-B(4B)-B(5B)-C(1B) | 150.0(6)  |
| B(3B)-B(4B)-B(5B)-C(1B) | 46.0(4)   |
| C(1B)-B(4B)-B(5B)-B(9B) | -150.0(6) |
| B(8B)-B(4B)-B(5B)-B(9B) | -45.8(5)  |
| B(3B)-B(4B)-B(5B)-B(9B) | -104.0(5) |
| C(1B)-B(4B)-B(5B)-B(6B) | -104.5(5) |
| B(8B)-B(4B)-B(5B)-B(6B) | -0.3(6)   |
| B(9B)-B(4B)-B(5B)-B(6B) | 45.5(5)   |
| B(3B)-B(4B)-B(5B)-B(6B) | -58.5(5)  |
| C(1B)-B(4B)-B(5B)-B(2B) | -46.0(4)  |
| B(8B)-B(4B)-B(5B)-B(2B) | 58.2(5)   |
| B(9B)-B(4B)-B(5B)-B(2B) | 104.0(5)  |
| B(3B)-B(4B)-B(5B)-B(2B) | 0.0(4)    |
| B(7B)-B(2B)-B(5B)-C(1B) | -104.0(5) |
| B(6B)-B(2B)-B(5B)-C(1B) | -150.4(6) |
| B(3B)-B(2B)-B(5B)-C(1B) | -45.8(4)  |
| C(1B)-B(2B)-B(5B)-B(9B) | 105.0(6)  |
| B(7B)-B(2B)-B(5B)-B(9B) | 1.1(6)    |
| B(6B)-B(2B)-B(5B)-B(9B) | -45.3(5)  |
| B(3B)-B(2B)-B(5B)-B(9B) | 59.2(5)   |
| C(1B)-B(2B)-B(5B)-B(6B) | 150.4(6)  |
| B(7B)-B(2B)-B(5B)-B(6B) | 46.4(5)   |
| B(3B)-B(2B)-B(5B)-B(6B) | 104.5(5)  |
| C(1B)-B(2B)-B(5B)-B(4B) | 45.9(4)   |
| B(7B)-B(2B)-B(5B)-B(4B) | -58.1(5)  |
| B(6B)-B(2B)-B(5B)-B(4B) | -104.5(5) |

|                          |           |
|--------------------------|-----------|
| B(3B)-B(2B)-B(5B)-B(4B)  | 0.0(4)    |
| C(1B)-B(2B)-B(6B)-B(10B) | 77.1(7)   |
| B(7B)-B(2B)-B(6B)-B(10B) | -23.5(6)  |
| B(3B)-B(2B)-B(6B)-B(10B) | 20.2(7)   |
| B(5B)-B(2B)-B(6B)-B(10B) | 102.0(7)  |
| C(1B)-B(2B)-B(6B)-B(5B)  | -24.9(5)  |
| B(7B)-B(2B)-B(6B)-B(5B)  | -125.5(6) |
| B(3B)-B(2B)-B(6B)-B(5B)  | -81.8(5)  |
| C(1B)-B(2B)-B(6B)-B(7B)  | 100.6(6)  |
| B(3B)-B(2B)-B(6B)-B(7B)  | 43.7(5)   |
| B(5B)-B(2B)-B(6B)-B(7B)  | 125.5(6)  |
| C(1B)-B(2B)-B(6B)-B(9B)  | 19.1(7)   |
| B(7B)-B(2B)-B(6B)-B(9B)  | -81.5(6)  |
| B(3B)-B(2B)-B(6B)-B(9B)  | -37.8(6)  |
| B(5B)-B(2B)-B(6B)-B(9B)  | 44.0(5)   |
| C(1B)-B(5B)-B(6B)-B(10B) | -78.6(7)  |
| B(9B)-B(5B)-B(6B)-B(10B) | 23.5(6)   |
| B(4B)-B(5B)-B(6B)-B(10B) | -21.2(7)  |
| B(2B)-B(5B)-B(6B)-B(10B) | -104.1(7) |
| C(1B)-B(5B)-B(6B)-B(2B)  | 25.5(5)   |
| B(9B)-B(5B)-B(6B)-B(2B)  | 127.6(6)  |
| B(4B)-B(5B)-B(6B)-B(2B)  | 82.9(5)   |
| C(1B)-B(5B)-B(6B)-B(7B)  | -20.1(7)  |
| B(9B)-B(5B)-B(6B)-B(7B)  | 82.0(6)   |
| B(4B)-B(5B)-B(6B)-B(7B)  | 37.3(6)   |
| B(2B)-B(5B)-B(6B)-B(7B)  | -45.6(5)  |
| C(1B)-B(5B)-B(6B)-B(9B)  | -102.1(6) |
| B(4B)-B(5B)-B(6B)-B(9B)  | -44.7(5)  |
| B(2B)-B(5B)-B(6B)-B(9B)  | -127.6(6) |
| C(1B)-B(3B)-B(7B)-B(10B) | 77.8(7)   |
| B(8B)-B(3B)-B(7B)-B(10B) | -23.7(6)  |
| B(4B)-B(3B)-B(7B)-B(10B) | 20.7(7)   |
| B(2B)-B(3B)-B(7B)-B(10B) | 104.6(7)  |
| C(1B)-B(3B)-B(7B)-B(2B)  | -26.8(5)  |
| B(8B)-B(3B)-B(7B)-B(2B)  | -128.3(6) |
| B(4B)-B(3B)-B(7B)-B(2B)  | -83.8(5)  |

|                          |           |
|--------------------------|-----------|
| C(1B)-B(3B)-B(7B)-B(8B)  | 101.5(6)  |
| B(4B)-B(3B)-B(7B)-B(8B)  | 44.5(5)   |
| B(2B)-B(3B)-B(7B)-B(8B)  | 128.3(5)  |
| C(1B)-B(3B)-B(7B)-B(6B)  | 17.5(7)   |
| B(8B)-B(3B)-B(7B)-B(6B)  | -84.0(6)  |
| B(4B)-B(3B)-B(7B)-B(6B)  | -39.5(6)  |
| B(2B)-B(3B)-B(7B)-B(6B)  | 44.3(5)   |
| C(1B)-B(2B)-B(7B)-B(10B) | -77.3(7)  |
| B(6B)-B(2B)-B(7B)-B(10B) | 24.0(6)   |
| B(3B)-B(2B)-B(7B)-B(10B) | -104.0(7) |
| B(5B)-B(2B)-B(7B)-B(10B) | -21.7(7)  |
| C(1B)-B(2B)-B(7B)-B(3B)  | 26.6(5)   |
| B(6B)-B(2B)-B(7B)-B(3B)  | 128.0(6)  |
| B(5B)-B(2B)-B(7B)-B(3B)  | 82.2(5)   |
| C(1B)-B(2B)-B(7B)-B(8B)  | -17.4(7)  |
| B(6B)-B(2B)-B(7B)-B(8B)  | 83.9(6)   |
| B(3B)-B(2B)-B(7B)-B(8B)  | -44.0(5)  |
| B(5B)-B(2B)-B(7B)-B(8B)  | 38.2(6)   |
| C(1B)-B(2B)-B(7B)-B(6B)  | -101.4(6) |
| B(3B)-B(2B)-B(7B)-B(6B)  | -128.0(6) |
| B(5B)-B(2B)-B(7B)-B(6B)  | -45.7(5)  |
| B(2B)-B(6B)-B(7B)-B(10B) | -153.7(7) |
| B(5B)-B(6B)-B(7B)-B(10B) | -107.1(6) |
| B(9B)-B(6B)-B(7B)-B(10B) | -49.0(5)  |
| B(10B)-B(6B)-B(7B)-B(3B) | 108.4(6)  |
| B(2B)-B(6B)-B(7B)-B(3B)  | -45.3(5)  |
| B(5B)-B(6B)-B(7B)-B(3B)  | 1.2(7)    |
| B(9B)-B(6B)-B(7B)-B(3B)  | 59.4(6)   |
| B(10B)-B(6B)-B(7B)-B(2B) | 153.7(7)  |
| B(5B)-B(6B)-B(7B)-B(2B)  | 46.5(5)   |
| B(9B)-B(6B)-B(7B)-B(2B)  | 104.7(5)  |
| B(10B)-B(6B)-B(7B)-B(8B) | 49.3(5)   |
| B(2B)-B(6B)-B(7B)-B(8B)  | -104.4(5) |
| B(5B)-B(6B)-B(7B)-B(8B)  | -57.8(6)  |
| B(9B)-B(6B)-B(7B)-B(8B)  | 0.3(5)    |
| C(1B)-B(3B)-B(8B)-B(10B) | -77.3(7)  |

|                          |           |
|--------------------------|-----------|
| B(7B)-B(3B)-B(8B)-B(10B) | 23.8(6)   |
| B(4B)-B(3B)-B(8B)-B(10B) | -103.6(7) |
| B(2B)-B(3B)-B(8B)-B(10B) | -20.1(7)  |
| C(1B)-B(3B)-B(8B)-B(4B)  | 26.3(5)   |
| B(7B)-B(3B)-B(8B)-B(4B)  | 127.4(6)  |
| B(2B)-B(3B)-B(8B)-B(4B)  | 83.5(5)   |
| C(1B)-B(3B)-B(8B)-B(7B)  | -101.1(6) |
| B(4B)-B(3B)-B(8B)-B(7B)  | -127.4(6) |
| B(2B)-B(3B)-B(8B)-B(7B)  | -43.9(5)  |
| C(1B)-B(3B)-B(8B)-B(9B)  | -18.9(7)  |
| B(7B)-B(3B)-B(8B)-B(9B)  | 82.2(6)   |
| B(4B)-B(3B)-B(8B)-B(9B)  | -45.2(5)  |
| B(2B)-B(3B)-B(8B)-B(9B)  | 38.3(6)   |
| C(1B)-B(4B)-B(8B)-B(10B) | 78.2(7)   |
| B(9B)-B(4B)-B(8B)-B(10B) | -22.3(6)  |
| B(3B)-B(4B)-B(8B)-B(10B) | 104.4(7)  |
| B(5B)-B(4B)-B(8B)-B(10B) | 22.3(7)   |
| C(1B)-B(4B)-B(8B)-B(3B)  | -26.2(5)  |
| B(9B)-B(4B)-B(8B)-B(3B)  | -126.7(6) |
| B(5B)-B(4B)-B(8B)-B(3B)  | -82.2(5)  |
| C(1B)-B(4B)-B(8B)-B(7B)  | 18.5(7)   |
| B(9B)-B(4B)-B(8B)-B(7B)  | -82.0(6)  |
| B(3B)-B(4B)-B(8B)-B(7B)  | 44.7(5)   |
| B(5B)-B(4B)-B(8B)-B(7B)  | -37.5(6)  |
| C(1B)-B(4B)-B(8B)-B(9B)  | 100.5(6)  |
| B(3B)-B(4B)-B(8B)-B(9B)  | 126.7(6)  |
| B(5B)-B(4B)-B(8B)-B(9B)  | 44.6(5)   |
| B(3B)-B(7B)-B(8B)-B(10B) | -153.8(6) |
| B(2B)-B(7B)-B(8B)-B(10B) | -108.7(6) |
| B(6B)-B(7B)-B(8B)-B(10B) | -49.6(5)  |
| B(10B)-B(7B)-B(8B)-B(3B) | 153.8(6)  |
| B(2B)-B(7B)-B(8B)-B(3B)  | 45.1(5)   |
| B(6B)-B(7B)-B(8B)-B(3B)  | 104.2(5)  |
| B(10B)-B(7B)-B(8B)-B(4B) | 108.2(6)  |
| B(3B)-B(7B)-B(8B)-B(4B)  | -45.6(5)  |
| B(2B)-B(7B)-B(8B)-B(4B)  | -0.5(6)   |

|                          |           |
|--------------------------|-----------|
| B(6B)-B(7B)-B(8B)-B(4B)  | 58.6(6)   |
| B(10B)-B(7B)-B(8B)-B(9B) | 49.3(5)   |
| B(3B)-B(7B)-B(8B)-B(9B)  | -104.5(5) |
| B(2B)-B(7B)-B(8B)-B(9B)  | -59.4(6)  |
| B(6B)-B(7B)-B(8B)-B(9B)  | -0.3(5)   |
| C(1B)-B(5B)-B(9B)-B(10B) | 77.3(7)   |
| B(6B)-B(5B)-B(9B)-B(10B) | -24.3(6)  |
| B(4B)-B(5B)-B(9B)-B(10B) | 103.2(7)  |
| B(2B)-B(5B)-B(9B)-B(10B) | 19.8(7)   |
| C(1B)-B(5B)-B(9B)-B(4B)  | -25.8(5)  |
| B(6B)-B(5B)-B(9B)-B(4B)  | -127.5(6) |
| B(2B)-B(5B)-B(9B)-B(4B)  | -83.3(5)  |
| C(1B)-B(5B)-B(9B)-B(8B)  | 18.5(7)   |
| B(6B)-B(5B)-B(9B)-B(8B)  | -83.1(6)  |
| B(4B)-B(5B)-B(9B)-B(8B)  | 44.4(5)   |
| B(2B)-B(5B)-B(9B)-B(8B)  | -39.0(6)  |
| C(1B)-B(5B)-B(9B)-B(6B)  | 101.7(6)  |
| B(4B)-B(5B)-B(9B)-B(6B)  | 127.5(6)  |
| B(2B)-B(5B)-B(9B)-B(6B)  | 44.2(5)   |
| C(1B)-B(4B)-B(9B)-B(10B) | -79.2(7)  |
| B(8B)-B(4B)-B(9B)-B(10B) | 22.4(6)   |
| B(3B)-B(4B)-B(9B)-B(10B) | -22.2(7)  |
| B(5B)-B(4B)-B(9B)-B(10B) | -104.4(7) |
| C(1B)-B(4B)-B(9B)-B(5B)  | 25.2(5)   |
| B(8B)-B(4B)-B(9B)-B(5B)  | 126.8(6)  |
| B(3B)-B(4B)-B(9B)-B(5B)  | 82.2(5)   |
| C(1B)-B(4B)-B(9B)-B(8B)  | -101.7(6) |
| B(3B)-B(4B)-B(9B)-B(8B)  | -44.6(5)  |
| B(5B)-B(4B)-B(9B)-B(8B)  | -126.8(6) |
| C(1B)-B(4B)-B(9B)-B(6B)  | -19.3(7)  |
| B(8B)-B(4B)-B(9B)-B(6B)  | 82.3(6)   |
| B(3B)-B(4B)-B(9B)-B(6B)  | 37.7(6)   |
| B(5B)-B(4B)-B(9B)-B(6B)  | -44.5(5)  |
| B(3B)-B(8B)-B(9B)-B(10B) | -109.0(6) |
| B(4B)-B(8B)-B(9B)-B(10B) | -155.0(6) |
| B(7B)-B(8B)-B(9B)-B(10B) | -50.1(5)  |

|                          |           |
|--------------------------|-----------|
| B(10B)-B(8B)-B(9B)-B(5B) | 109.4(6)  |
| B(3B)-B(8B)-B(9B)-B(5B)  | 0.4(7)    |
| B(4B)-B(8B)-B(9B)-B(5B)  | -45.6(5)  |
| B(7B)-B(8B)-B(9B)-B(5B)  | 59.3(6)   |
| B(10B)-B(8B)-B(9B)-B(4B) | 155.0(6)  |
| B(3B)-B(8B)-B(9B)-B(4B)  | 46.0(5)   |
| B(7B)-B(8B)-B(9B)-B(4B)  | 104.9(5)  |
| B(10B)-B(8B)-B(9B)-B(6B) | 50.4(5)   |
| B(3B)-B(8B)-B(9B)-B(6B)  | -58.5(6)  |
| B(4B)-B(8B)-B(9B)-B(6B)  | -104.5(5) |
| B(7B)-B(8B)-B(9B)-B(6B)  | 0.3(5)    |
| B(2B)-B(6B)-B(9B)-B(10B) | 108.0(6)  |
| B(5B)-B(6B)-B(9B)-B(10B) | 153.2(6)  |
| B(7B)-B(6B)-B(9B)-B(10B) | 49.6(5)   |
| B(10B)-B(6B)-B(9B)-B(5B) | -153.2(6) |
| B(2B)-B(6B)-B(9B)-B(5B)  | -45.2(5)  |
| B(7B)-B(6B)-B(9B)-B(5B)  | -103.6(5) |
| B(10B)-B(6B)-B(9B)-B(4B) | -107.9(6) |
| B(2B)-B(6B)-B(9B)-B(4B)  | 0.1(7)    |
| B(5B)-B(6B)-B(9B)-B(4B)  | 45.3(5)   |
| B(7B)-B(6B)-B(9B)-B(4B)  | -58.3(6)  |
| B(10B)-B(6B)-B(9B)-B(8B) | -49.9(5)  |
| B(2B)-B(6B)-B(9B)-B(8B)  | 58.2(6)   |
| B(5B)-B(6B)-B(9B)-B(8B)  | 103.3(5)  |
| B(7B)-B(6B)-B(9B)-B(8B)  | -0.3(5)   |
| B(5B)-B(9B)-B(10B)-B(7B) | -32.3(8)  |
| B(4B)-B(9B)-B(10B)-B(7B) | 34.1(8)   |
| B(8B)-B(9B)-B(10B)-B(7B) | 57.0(5)   |
| B(6B)-B(9B)-B(10B)-B(7B) | -57.2(6)  |
| B(5B)-B(9B)-B(10B)-B(8B) | -89.3(6)  |
| B(4B)-B(9B)-B(10B)-B(8B) | -22.9(6)  |
| B(6B)-B(9B)-B(10B)-B(8B) | -114.2(6) |
| B(5B)-B(9B)-B(10B)-B(6B) | 24.9(6)   |
| B(4B)-B(9B)-B(10B)-B(6B) | 91.3(6)   |
| B(8B)-B(9B)-B(10B)-B(6B) | 114.2(6)  |
| B(3B)-B(7B)-B(10B)-B(9B) | -33.8(8)  |

|                          |           |
|--------------------------|-----------|
| B(2B)-B(7B)-B(10B)-B(9B) | 33.3(8)   |
| B(8B)-B(7B)-B(10B)-B(9B) | -58.2(6)  |
| B(6B)-B(7B)-B(10B)-B(9B) | 57.8(6)   |
| B(3B)-B(7B)-B(10B)-B(8B) | 24.3(6)   |
| B(2B)-B(7B)-B(10B)-B(8B) | 91.5(6)   |
| B(6B)-B(7B)-B(10B)-B(8B) | 116.0(6)  |
| B(3B)-B(7B)-B(10B)-B(6B) | -91.7(6)  |
| B(2B)-B(7B)-B(10B)-B(6B) | -24.5(6)  |
| B(8B)-B(7B)-B(10B)-B(6B) | -116.0(6) |
| B(3B)-B(8B)-B(10B)-B(9B) | 90.1(6)   |
| B(4B)-B(8B)-B(10B)-B(9B) | 23.2(6)   |
| B(7B)-B(8B)-B(10B)-B(9B) | 114.5(6)  |
| B(3B)-B(8B)-B(10B)-B(7B) | -24.4(6)  |
| B(4B)-B(8B)-B(10B)-B(7B) | -91.2(6)  |
| B(9B)-B(8B)-B(10B)-B(7B) | -114.5(6) |
| B(3B)-B(8B)-B(10B)-B(6B) | 31.9(8)   |
| B(4B)-B(8B)-B(10B)-B(6B) | -35.0(7)  |
| B(7B)-B(8B)-B(10B)-B(6B) | 56.3(5)   |
| B(9B)-B(8B)-B(10B)-B(6B) | -58.2(6)  |
| B(2B)-B(6B)-B(10B)-B(9B) | -90.3(6)  |
| B(5B)-B(6B)-B(10B)-B(9B) | -24.4(6)  |
| B(7B)-B(6B)-B(10B)-B(9B) | -114.5(6) |
| B(2B)-B(6B)-B(10B)-B(7B) | 24.3(6)   |
| B(5B)-B(6B)-B(10B)-B(7B) | 90.2(6)   |
| B(9B)-B(6B)-B(10B)-B(7B) | 114.5(6)  |
| B(2B)-B(6B)-B(10B)-B(8B) | -31.8(8)  |
| B(5B)-B(6B)-B(10B)-B(8B) | 34.1(7)   |
| B(7B)-B(6B)-B(10B)-B(8B) | -56.1(5)  |
| B(9B)-B(6B)-B(10B)-B(8B) | 58.5(5)   |
| O(2U)-Li(1)-O(1T)-C(1T)  | -57(3)    |
| O(2T)-Li(1)-O(1T)-C(1T)  | -53(3)    |
| O(1U)-Li(1)-O(1T)-C(1T)  | 36(5)     |
| C(2)-Li(1)-O(1T)-C(1T)   | 138(2)    |
| O(2U)-Li(1)-O(1T)-C(4T)  | 150.2(19) |
| O(2T)-Li(1)-O(1T)-C(4T)  | 154(2)    |
| O(1U)-Li(1)-O(1T)-C(4T)  | -118(7)   |



|                         |            |
|-------------------------|------------|
| C(2)-Li(1)-O(1T)-C(4T)  | -15(2)     |
| C(4T)-O(1T)-C(1T)-C(2T) | -1(3)      |
| Li(1)-O(1T)-C(1T)-C(2T) | -158.1(19) |
| O(1T)-C(1T)-C(2T)-C(3T) | -23(2)     |
| C(1T)-C(2T)-C(3T)-C(4T) | 36(2)      |
| C(1T)-O(1T)-C(4T)-C(3T) | 24(2)      |
| Li(1)-O(1T)-C(4T)-C(3T) | -180(2)    |
| C(2T)-C(3T)-C(4T)-O(1T) | -37(2)     |
| O(1T)-Li(1)-O(1U)-C(1U) | -80(6)     |
| O(2U)-Li(1)-O(1U)-C(1U) | 14(2)      |
| O(2T)-Li(1)-O(1U)-C(1U) | 16(2)      |
| C(2)-Li(1)-O(1U)-C(1U)  | -164.3(14) |
| O(1T)-Li(1)-O(1U)-C(4U) | 72(6)      |
| O(2U)-Li(1)-O(1U)-C(4U) | 166.1(12)  |
| O(2T)-Li(1)-O(1U)-C(4U) | 168.7(15)  |
| C(2)-Li(1)-O(1U)-C(4U)  | -11.9(13)  |
| C(4U)-O(1U)-C(1U)-C(2U) | -7.0(17)   |
| Li(1)-O(1U)-C(1U)-C(2U) | 146.4(13)  |
| O(1U)-C(1U)-C(2U)-C(3U) | -17.5(17)  |
| C(1U)-C(2U)-C(3U)-C(4U) | 33.6(15)   |
| C(1U)-O(1U)-C(4U)-C(3U) | 28.9(16)   |
| Li(1)-O(1U)-C(4U)-C(3U) | -130.1(14) |
| C(2U)-C(3U)-C(4U)-O(1U) | -38.5(15)  |
| O(1T)-Li(1)-O(2T)-C(5T) | -139(2)    |
| O(2U)-Li(1)-O(2T)-C(5T) | -6(20)     |
| O(1U)-Li(1)-O(2T)-C(5T) | -152.2(19) |
| C(2)-Li(1)-O(2T)-C(5T)  | 28(3)      |
| O(1T)-Li(1)-O(2T)-C(8T) | 69(4)      |
| O(1U)-Li(1)-O(2T)-C(8T) | 56(4)      |
| C(2)-Li(1)-O(2T)-C(8T)  | -123(3)    |
| C(8T)-O(2T)-C(5T)-C(6T) | 15(3)      |
| Li(1)-O(2T)-C(5T)-C(6T) | -149(3)    |
| O(2T)-C(5T)-C(6T)-C(7T) | 10(4)      |
| C(5T)-C(6T)-C(7T)-C(8T) | -29(3)     |
| C(5T)-O(2T)-C(8T)-C(7T) | -33(3)     |
| Li(1)-O(2T)-C(8T)-C(7T) | 118(3)     |

|                             |            |
|-----------------------------|------------|
| C(6T)-C(7T)-C(8T)-O(2T)     | 38(2)      |
| O(1T)-Li(1)-O(2U)-C(8U)     | 71.9(17)   |
| O(2T)-Li(1)-O(2U)-C(8U)     | 24(21)     |
| O(1U)-Li(1)-O(2U)-C(8U)     | 58.4(17)   |
| C(2)-Li(1)-O(2U)-C(8U)      | -123.6(13) |
| O(1T)-Li(1)-O(2U)-C(5U)     | -133.0(16) |
| O(2T)-Li(1)-O(2U)-C(5U)     | 179(100)   |
| O(1U)-Li(1)-O(2U)-C(5U)     | -146.5(14) |
| C(2)-Li(1)-O(2U)-C(5U)      | 31(2)      |
| C(8U)-O(2U)-C(5U)-C(6U)     | 22(2)      |
| Li(1)-O(2U)-C(5U)-C(6U)     | -136.3(17) |
| O(2U)-C(5U)-C(6U)-C(7U)     | -39.1(19)  |
| C(5U)-C(6U)-C(7U)-C(8U)     | 41(2)      |
| C(5U)-O(2U)-C(8U)-C(7U)     | 6(2)       |
| Li(1)-O(2U)-C(8U)-C(7U)     | 163.7(18)  |
| C(6U)-C(7U)-C(8U)-O(2U)     | -30(2)     |
| C(12T)-O(3T)-C(9T)-C(10T)   | -10.0(7)   |
| Li(2)-O(3T)-C(9T)-C(10T)    | 132.7(6)   |
| O(3T)-C(9T)-C(10T)-C(11T)   | -13.8(7)   |
| C(9T)-C(10T)-C(11T)-C(12T)  | 30.8(7)    |
| C(9T)-O(3T)-C(12T)-C(11T)   | 29.0(6)    |
| Li(2)-O(3T)-C(12T)-C(11T)   | -109.8(6)  |
| C(10T)-C(11T)-C(12T)-O(3T)  | -37.1(7)   |
| C(16T)-O(4T)-C(13T)-C(14T)  | 0.2(9)     |
| Li(4)-O(4T)-C(13T)-C(14T)   | 169.6(6)   |
| O(4T)-C(13T)-C(14T)-C(15U)  | 19.7(16)   |
| O(4T)-C(13T)-C(14T)-C(15T)  | -14.1(19)  |
| C(13T)-C(14T)-C(15T)-C(16T) | 22(3)      |
| C(15U)-C(14T)-C(15T)-C(16T) | -67.7(11)  |
| C(13T)-C(14T)-C(15U)-C(16T) | -32(2)     |
| C(15T)-C(14T)-C(15U)-C(16T) | 67.5(11)   |
| C(13T)-O(4T)-C(16T)-C(15T)  | 13.8(19)   |
| Li(4)-O(4T)-C(16T)-C(15T)   | -155.3(17) |
| C(13T)-O(4T)-C(16T)-C(15U)  | -19.8(14)  |
| Li(4)-O(4T)-C(16T)-C(15U)   | 171.1(13)  |
| C(14T)-C(15T)-C(16T)-O(4T)  | -22(3)     |

|                             |           |
|-----------------------------|-----------|
| C(14T)-C(15T)-C(16T)-C(15U) | 66.4(11)  |
| C(14T)-C(15U)-C(16T)-O(4T)  | 32(2)     |
| C(14T)-C(15U)-C(16T)-C(15T) | -68.5(11) |
| C(17U)-O(5T)-C(17T)-C(18T)  | -54.5(12) |
| C(20U)-O(5T)-C(17T)-C(18T)  | 72.1(13)  |
| C(20T)-O(5T)-C(17T)-C(18T)  | 24.4(13)  |
| Li(4)-O(5T)-C(17T)-C(18T)   | -172.4(9) |
| O(5T)-C(17T)-C(18T)-C(19T)  | -8.6(17)  |
| C(17T)-C(18T)-C(19T)-C(20T) | -9.7(18)  |
| C(17U)-O(5T)-C(20T)-C(19T)  | 37.5(13)  |
| C(17T)-O(5T)-C(20T)-C(19T)  | -30.1(13) |
| C(20U)-O(5T)-C(20T)-C(19T)  | -75.7(15) |
| Li(4)-O(5T)-C(20T)-C(19T)   | 166.4(9)  |
| C(18T)-C(19T)-C(20T)-O(5T)  | 24.1(16)  |
| C(17T)-O(5T)-C(17U)-C(18U)  | 59.4(17)  |
| C(20U)-O(5T)-C(17U)-C(18U)  | 11(3)     |
| C(20T)-O(5T)-C(17U)-C(18U)  | -50.6(18) |
| Li(4)-O(5T)-C(17U)-C(18U)   | 179.9(14) |
| O(5T)-C(17U)-C(18U)-C(19U)  | 14(3)     |
| C(17U)-C(18U)-C(19U)-C(20U) | -31(3)    |
| C(17U)-O(5T)-C(20U)-C(19U)  | -31(2)    |
| C(17T)-O(5T)-C(20U)-C(19U)  | -84.3(16) |
| C(20T)-O(5T)-C(20U)-C(19U)  | 44.5(16)  |
| Li(4)-O(5T)-C(20U)-C(19U)   | 160.4(12) |
| C(18U)-C(19U)-C(20U)-O(5T)  | 38(2)     |
| O(7T)-Li(4)-O(6T)-C(24T)    | 128(3)    |
| O(7U)-Li(4)-O(6T)-C(24T)    | 126(3)    |
| O(6U)-Li(4)-O(6T)-C(24T)    | -102(12)  |
| O(4T)-Li(4)-O(6T)-C(24T)    | 8(4)      |
| O(5T)-Li(4)-O(6T)-C(24T)    | -115(3)   |
| O(7T)-Li(4)-O(6T)-C(21T)    | -78(2)    |
| O(7U)-Li(4)-O(6T)-C(21T)    | -80(2)    |
| O(6U)-Li(4)-O(6T)-C(21T)    | 51(9)     |
| O(4T)-Li(4)-O(6T)-C(21T)    | 161.3(17) |
| O(5T)-Li(4)-O(6T)-C(21T)    | 39(2)     |
| C(24T)-O(6T)-C(21T)-C(22T)  | -17(3)    |

|                             |            |
|-----------------------------|------------|
| Li(4)-O(6T)-C(21T)-C(22T)   | -178(2)    |
| O(6T)-C(21T)-C(22T)-C(23T)  | 27(3)      |
| C(21T)-C(22T)-C(23T)-C(24T) | -28(3)     |
| C(21T)-O(6T)-C(24T)-C(23T)  | -2(3)      |
| Li(4)-O(6T)-C(24T)-C(23T)   | 152(3)     |
| C(22T)-C(23T)-C(24T)-O(6T)  | 19(3)      |
| O(6T)-Li(4)-O(6U)-C(24U)    | 68(10)     |
| O(7T)-Li(4)-O(6U)-C(24U)    | 120.1(19)  |
| O(7U)-Li(4)-O(6U)-C(24U)    | 117(2)     |
| O(4T)-Li(4)-O(6U)-C(24U)    | -4(2)      |
| O(5T)-Li(4)-O(6U)-C(24U)    | -124.1(18) |
| O(6T)-Li(4)-O(6U)-C(21U)    | -99(12)    |
| O(7T)-Li(4)-O(6U)-C(21U)    | -47(3)     |
| O(7U)-Li(4)-O(6U)-C(21U)    | -50(3)     |
| O(4T)-Li(4)-O(6U)-C(21U)    | -171(2)    |
| O(5T)-Li(4)-O(6U)-C(21U)    | 69(2)      |
| C(24U)-O(6U)-C(21U)-C(22U)  | 35.4(19)   |
| Li(4)-O(6U)-C(21U)-C(22U)   | -157(2)    |
| O(6U)-C(21U)-C(22U)-C(23U)  | -38.0(18)  |
| C(21U)-C(22U)-C(23U)-C(24U) | 26(2)      |
| C(21U)-O(6U)-C(24U)-C(23U)  | -19(2)     |
| Li(4)-O(6U)-C(24U)-C(23U)   | 170.5(18)  |
| C(22U)-C(23U)-C(24U)-O(6U)  | -6(3)      |
| O(6T)-Li(4)-O(7T)-C(25T)    | 99.8(15)   |
| O(7U)-Li(4)-O(7T)-C(25T)    | 117(9)     |
| O(6U)-Li(4)-O(7T)-C(25T)    | 94.4(15)   |
| O(4T)-Li(4)-O(7T)-C(25T)    | -143.1(12) |
| O(5T)-Li(4)-O(7T)-C(25T)    | -23.4(15)  |
| O(6T)-Li(4)-O(7T)-C(28T)    | -56.3(15)  |
| O(7U)-Li(4)-O(7T)-C(28T)    | -40(8)     |
| O(6U)-Li(4)-O(7T)-C(28T)    | -61.7(15)  |
| O(4T)-Li(4)-O(7T)-C(28T)    | 60.7(14)   |
| O(5T)-Li(4)-O(7T)-C(28T)    | -179.6(11) |
| C(28T)-O(7T)-C(25T)-C(26T)  | -5(2)      |
| Li(4)-O(7T)-C(25T)-C(26T)   | -163.1(13) |
| O(7T)-C(25T)-C(26T)-C(27T)  | 23(2)      |

|                             |           |
|-----------------------------|-----------|
| C(25T)-C(26T)-C(27T)-C(28T) | -30(2)    |
| C(25T)-O(7T)-C(28T)-C(27T)  | -14.2(18) |
| Li(4)-O(7T)-C(28T)-C(27T)   | 145.8(12) |
| C(26T)-C(27T)-C(28T)-O(7T)  | 27.8(19)  |
| O(6T)-Li(4)-O(7U)-C(25U)    | -162(2)   |
| O(7T)-Li(4)-O(7U)-C(25U)    | 35(7)     |
| O(6U)-Li(4)-O(7U)-C(25U)    | -167(2)   |
| O(4T)-Li(4)-O(7U)-C(25U)    | -48(3)    |
| O(5T)-Li(4)-O(7U)-C(25U)    | 76(3)     |
| O(6T)-Li(4)-O(7U)-C(28U)    | 22(2)     |
| O(7T)-Li(4)-O(7U)-C(28U)    | -142(10)  |
| O(6U)-Li(4)-O(7U)-C(28U)    | 17(2)     |
| O(4T)-Li(4)-O(7U)-C(28U)    | 135.5(18) |
| O(5T)-Li(4)-O(7U)-C(28U)    | -100(2)   |
| C(28U)-O(7U)-C(25U)-C(26U)  | -7(3)     |
| Li(4)-O(7U)-C(25U)-C(26U)   | 176.2(19) |
| O(7U)-C(25U)-C(26U)-C(27U)  | 30(2)     |
| C(25U)-C(26U)-C(27U)-C(28U) | -40.4(19) |
| C(25U)-O(7U)-C(28U)-C(27U)  | -20(3)    |
| Li(4)-O(7U)-C(28U)-C(27U)   | 157.2(18) |
| C(26U)-C(27U)-C(28U)-O(7U)  | 37(2)     |
| C(4S)-O(1S)-C(1S)-C(2S)     | 25(2)     |
| O(1S)-C(1S)-C(2S)-C(3S)     | -31(2)    |
| C(1S)-C(2S)-C(3S)-C(4S)     | 24(2)     |
| C(1S)-O(1S)-C(4S)-C(3S)     | -11(2)    |
| C(2S)-C(3S)-C(4S)-O(1S)     | -9(2)     |

---

Symmetry transformations used to generate equivalent atoms:

#1 -x+1,-y+1,-z

## References:

1. T. Jelinek, B. Plešek and S. Heřmánek, *J. Organomet. Chem.* 1986, **307**, **2**, C13-C15.
2. A. Franken, C. A. Kilner and J. D. Kennedy, *Chem. Commun.* 2004, **3**, 328-329.
3. B. Brellochs, J. Backovsky, B. Stibr, T. Jelinek, J. Holub, M. Bakardjiev, D. Hnyk, M. Hoffmann, I. Cisarova and B. Wrackmeyer, *Eur. J. Inor. Chem.* 2004, **18**, 3605-3611.
4. B. Ringstrand, A. Ballinski, A. Franken and P. Kaszynski, *Inorg. Chem.* 2005, **44**, **25**, 9561-9566.
5. K. S. B. Base, J. Dolansky and J. Duben, *Collect. Czech. Chem. Commun.* 1981, **46**, 2345-2353.
6. T. Jelinek, B. Stibr, J. Plešek, M. Thornton-Plett and J. D. Kennedy, *J. Chem. Soc., Dalton Trans.*, 1997, 4231-4236
